# Supplementary material for: Comparative transcriptome analysis reveals key long noncoding RNAs for cadmium tolerance in Tibetan hull-less barley
Source: Frontiers journal article supplement (doi:10.3389/fpls.2025.1572490), 2025-05-22
Supplement: Data_Sheet_1.zip [file Data_Sheet_1.zip]

## Sheet: X38_CK-vs-X38_Cd.tran.DEseq2
Table S7. Up-regulated and down-regulated lncRNAs and mRNAs in X38
GeneID	TranID	GorT	RNA_Type	Control	Case	Diff_Flag	Significant_Difference_Value	Corrected_Significant_Difference_Value	Fold_Change
HORVU.MOREX.r2.7HG0528860	TCONS_00074787	tran	lncRNA	X38_CK	X38_Cd	Dw	2.39377e-71	1.40387e-66	-3.34575
HORVU.MOREX.r2.7HG0606170	TCONS_00087038	tran	mRNA	X38_CK	X38_Cd	Up	1.03698e-48	3.0408e-44	3.97523
HORVU.MOREX.r2.2HG0132470	HORVU.MOREX.r2.2HG0132470.1	tran	mRNA	X38_CK	X38_Cd	Up	2.84979e-43	5.57106e-39	2.93658
XLOC_034726	TCONS_00049194	tran	lncRNA	X38_CK	X38_Cd	Up	2.5629e-42	3.75766e-38	7.60867
HORVU.MOREX.r2.7HG0610650	TCONS_00080549	tran	mRNA	X38_CK	X38_Cd	Up	2.4026e-39	2.81811e-35	8.00767
HORVU.MOREX.r2.7HG0583530	TCONS_00085445	tran	mRNA	X38_CK	X38_Cd	Up	2.1126e-38	2.06496e-34	2.58046
HORVU.MOREX.r2.7HG0548840	TCONS_00083073	tran	mRNA	X38_CK	X38_Cd	Up	2.16046e-36	1.81006e-32	2.68009
HORVU.MOREX.r2.UnG0631900	HORVU.MOREX.r2.UnG0631900.1	tran	mRNA	X38_CK	X38_Cd	Dw	6.31364e-36	4.62845e-32	-4.68901
HORVU.MOREX.r2.1HG0062440	HORVU.MOREX.r2.1HG0062440.1	tran	mRNA	X38_CK	X38_Cd	Up	3.08874e-32	2.01273e-28	4.44911
HORVU.MOREX.r2.7HG0620030	HORVU.MOREX.r2.7HG0620030.1	tran	mRNA	X38_CK	X38_Cd	Dw	1.0688e-31	6.26819e-28	-1.27878
HORVU.MOREX.r2.2HG0132760	TCONS_00015001	tran	mRNA	X38_CK	X38_Cd	Up	1.64236e-28	8.75629e-25	2.08615
HORVU.MOREX.r2.7HG0549590	TCONS_00076191	tran	mRNA	X38_CK	X38_Cd	Up	2.6925e-28	1.31589e-24	2.43826
HORVU.MOREX.r2.1HG0050390	HORVU.MOREX.r2.1HG0050390.1	tran	mRNA	X38_CK	X38_Cd	Up	4.05903e-27	1.83115e-23	2.74705
HORVU.MOREX.r2.5HG0396880	TCONS_00060078	tran	mRNA	X38_CK	X38_Cd	Up	8.99297e-27	3.76722e-23	2.74629
HORVU.MOREX.r2.6HG0505360	TCONS_00073144	tran	mRNA	X38_CK	X38_Cd	Up	6.57662e-26	2.57133e-22	4.67574
HORVU.MOREX.r2.7HG0551040	TCONS_00083221	tran	mRNA	X38_CK	X38_Cd	Up	1.02358e-25	3.75187e-22	4.12388
HORVU.MOREX.r2.3HG0263370	HORVU.MOREX.r2.3HG0263370.1	tran	mRNA	X38_CK	X38_Cd	Up	2.09486e-25	7.2269e-22	2.15643
HORVU.MOREX.r2.7HG0594910	TCONS_00086196	tran	mRNA	X38_CK	X38_Cd	Up	5.09837e-25	1.66114e-21	2.6343
HORVU.MOREX.r2.4HG0277890	HORVU.MOREX.r2.4HG0277890.1	tran	mRNA	X38_CK	X38_Cd	Up	3.07869e-24	9.50295e-21	4.76113
HORVU.MOREX.r2.7HG0606170	HORVU.MOREX.r2.7HG0606170.1	tran	mRNA	X38_CK	X38_Cd	Up	8.61991e-24	2.52766e-20	3.29697
HORVU.MOREX.r2.UnG0626650	TCONS_00089404	tran	mRNA	X38_CK	X38_Cd	Up	1.12622e-23	3.1452e-20	4.73264
HORVU.MOREX.r2.5HG0355100	TCONS_00056931	tran	mRNA	X38_CK	X38_Cd	Dw	2.02273e-23	5.39213e-20	-4.33547
HORVU.MOREX.r2.7HG0624070	TCONS_00088312	tran	mRNA	X38_CK	X38_Cd	Dw	4.13888e-23	1.05536e-19	-1.79389
HORVU.MOREX.r2.6HG0524500	HORVU.MOREX.r2.6HG0524500.1	tran	mRNA	X38_CK	X38_Cd	Up	1.9144e-22	4.67808e-19	2.90104
HORVU.MOREX.r2.5HG0355160	TCONS_00056966	tran	mRNA	X38_CK	X38_Cd	Dw	2.80913e-22	6.58989e-19	-4.66999
HORVU.MOREX.r2.3HG0265860	HORVU.MOREX.r2.3HG0265860.1	tran	mRNA	X38_CK	X38_Cd	Up	3.72004e-22	8.39112e-19	4.08072
HORVU.MOREX.r2.1HG0059310	HORVU.MOREX.r2.1HG0059310.1	tran	mRNA	X38_CK	X38_Cd	Up	4.65073e-22	1.01019e-18	2.33333
HORVU.MOREX.r2.3HG0246940	HORVU.MOREX.r2.3HG0246940.1	tran	mRNA	X38_CK	X38_Cd	Up	9.89149e-21	2.07181e-17	1.03752
XLOC_063971	TCONS_00090144	tran	lncRNA	X38_CK	X38_Cd	Up	2.96775e-20	6.00171e-17	5.645
HORVU.MOREX.r2.2HG0153350	TCONS_00023871	tran	mRNA	X38_CK	X38_Cd	Up	4.3307e-20	8.46609e-17	1.9703
HORVU.MOREX.r2.2HG0082310	HORVU.MOREX.r2.2HG0082310.1	tran	mRNA	X38_CK	X38_Cd	Up	2.58497e-19	4.89034e-16	5.81359
HORVU.MOREX.r2.4HG0344450	HORVU.MOREX.r2.4HG0344450.1	tran	mRNA	X38_CK	X38_Cd	Dw	5.15055e-19	9.43952e-16	-1.53002
HORVU.MOREX.r2.1HG0012500	TCONS_00000924	tran	mRNA	X38_CK	X38_Cd	Up	7.29301e-19	1.2961e-15	1.75616
HORVU.MOREX.r2.2HG0131980	TCONS_00014941	tran	mRNA	X38_CK	X38_Cd	Up	1.38836e-18	2.3948e-15	1.02205
HORVU.MOREX.r2.2HG0156670	HORVU.MOREX.r2.2HG0156670.1	tran	mRNA	X38_CK	X38_Cd	Dw	1.76675e-18	2.88766e-15	-1.90554
HORVU.MOREX.r2.6HG0505970	HORVU.MOREX.r2.6HG0505970.1	tran	mRNA	X38_CK	X38_Cd	Up	1.77257e-18	2.88766e-15	4.19757
HORVU.MOREX.r2.3HG0253970	HORVU.MOREX.r2.3HG0253970.1	tran	mRNA	X38_CK	X38_Cd	Up	5.19338e-18	8.23178e-15	2.16785
HORVU.MOREX.r2.6HG0466730	TCONS_00070478	tran	mRNA	X38_CK	X38_Cd	Dw	6.94057e-18	1.07117e-14	-1.50156
HORVU.MOREX.r2.6HG0521170	HORVU.MOREX.r2.6HG0521170.1	tran	mRNA	X38_CK	X38_Cd	Up	1.07552e-17	1.61733e-14	2.16478
HORVU.MOREX.r2.1HG0013750	HORVU.MOREX.r2.1HG0013750.1	tran	mRNA	X38_CK	X38_Cd	Up	2.00513e-17	2.91976e-14	2.38887
HORVU.MOREX.r2.4HG0322390	TCONS_00042510	tran	mRNA	X38_CK	X38_Cd	Up	2.0412e-17	2.91976e-14	1.88143
HORVU.MOREX.r2.1HG0044290	TCONS_00008773	tran	mRNA	X38_CK	X38_Cd	Up	2.76603e-17	3.86236e-14	2.12606
HORVU.MOREX.r2.5HG0391260	HORVU.MOREX.r2.5HG0391260.1	tran	mRNA	X38_CK	X38_Cd	Up	3.66351e-17	4.9966e-14	1.81868
HORVU.MOREX.r2.3HG0252650	HORVU.MOREX.r2.3HG0252650.1	tran	mRNA	X38_CK	X38_Cd	Up	4.5011e-17	5.99946e-14	3.21824
HORVU.MOREX.r2.4HG0331810	HORVU.MOREX.r2.4HG0331810.1	tran	mRNA	X38_CK	X38_Cd	Up	6.40386e-17	8.34594e-14	3.91789
HORVU.MOREX.r2.5HG0355150	TCONS_00056958	tran	lncRNA	X38_CK	X38_Cd	Dw	7.22842e-17	9.01968e-14	-5.06046
HORVU.MOREX.r2.7HG0610650	TCONS_00080550	tran	mRNA	X38_CK	X38_Cd	Up	7.17595e-17	9.01968e-14	12.2881
HORVU.MOREX.r2.5HG0355110	TCONS_00056939	tran	mRNA	X38_CK	X38_Cd	Dw	7.65247e-17	9.34988e-14	-4.13068
HORVU.MOREX.r2.5HG0423090	TCONS_00054802	tran	mRNA	X38_CK	X38_Cd	Up	1.02219e-16	1.22344e-13	4.77825
HORVU.MOREX.r2.2HG0114130	HORVU.MOREX.r2.2HG0114130.1	tran	mRNA	X38_CK	X38_Cd	Up	2.55074e-16	2.99186e-13	3.43768
HORVU.MOREX.r2.2HG0105580	TCONS_00020376	tran	lncRNA	X38_CK	X38_Cd	Up	2.67237e-16	3.07307e-13	1.53486
HORVU.MOREX.r2.2HG0092440	HORVU.MOREX.r2.2HG0092440.1	tran	mRNA	X38_CK	X38_Cd	Up	3.68775e-16	4.15915e-13	2.44141
HORVU.MOREX.r2.1HG0046860	HORVU.MOREX.r2.1HG0046860.1	tran	mRNA	X38_CK	X38_Cd	Dw	4.19797e-16	4.64525e-13	-1.68281
HORVU.MOREX.r2.4HG0328580	HORVU.MOREX.r2.4HG0328580.1	tran	mRNA	X38_CK	X38_Cd	Up	5.95254e-16	6.46479e-13	6.60416
HORVU.MOREX.r2.3HG0225090	TCONS_00035538	tran	mRNA	X38_CK	X38_Cd	Up	6.52818e-16	6.83675e-13	12.095
HORVU.MOREX.r2.3HG0234550	HORVU.MOREX.r2.3HG0234550.1	tran	mRNA	X38_CK	X38_Cd	Up	6.52188e-16	6.83675e-13	2.93983
HORVU.MOREX.r2.3HG0196660	HORVU.MOREX.r2.3HG0196660.1	tran	mRNA	X38_CK	X38_Cd	Dw	7.65358e-16	7.87473e-13	-2.18574
HORVU.MOREX.r2.5HG0355120	TCONS_00056943	tran	mRNA	X38_CK	X38_Cd	Dw	8.78354e-16	8.88153e-13	-3.58763
HORVU.MOREX.r2.7HG0593030	HORVU.MOREX.r2.7HG0593030.1	tran	mRNA	X38_CK	X38_Cd	Up	9.06374e-16	9.00951e-13	0.899243
HORVU.MOREX.r2.6HG0515330	HORVU.MOREX.r2.6HG0515330.1	tran	mRNA	X38_CK	X38_Cd	Up	1.03471e-15	1.01137e-12	3.81867
HORVU.MOREX.r2.1HG0052390	TCONS_00009318	tran	mRNA	X38_CK	X38_Cd	Dw	1.24441e-15	1.19641e-12	-10.2185
HORVU.MOREX.r2.7HG0554930	TCONS_00083480	tran	mRNA	X38_CK	X38_Cd	Up	1.68848e-15	1.59716e-12	1.19464
HORVU.MOREX.r2.1HG0044250	TCONS_00008766	tran	mRNA	X38_CK	X38_Cd	Up	2.06994e-15	1.92692e-12	11.6201
HORVU.MOREX.r2.2HG0142630	TCONS_00015718	tran	mRNA	X38_CK	X38_Cd	Dw	2.23772e-15	2.05056e-12	-3.08157
HORVU.MOREX.r2.6HG0522270	TCONS_00074306	tran	mRNA	X38_CK	X38_Cd	Dw	2.35573e-15	2.12549e-12	-1.04619
HORVU.MOREX.r2.4HG0323910	HORVU.MOREX.r2.4HG0323910.1	tran	mRNA	X38_CK	X38_Cd	Up	2.86122e-15	2.54246e-12	3.1696
HORVU.MOREX.r2.5HG0358820	TCONS_00057199	tran	mRNA	X38_CK	X38_Cd	Up	3.53446e-15	3.09382e-12	0.971075
HORVU.MOREX.r2.3HG0197340	HORVU.MOREX.r2.3HG0197340.1	tran	mRNA	X38_CK	X38_Cd	Up	3.89925e-15	3.36293e-12	5.95536
HORVU.MOREX.r2.5HG0445330	HORVU.MOREX.r2.5HG0445330.1	tran	mRNA	X38_CK	X38_Cd	Up	5.14694e-15	4.37467e-12	3.31255
HORVU.MOREX.r2.2HG0084160	HORVU.MOREX.r2.2HG0084160.1	tran	mRNA	X38_CK	X38_Cd	Dw	5.89129e-15	4.93581e-12	-2.79631
HORVU.MOREX.r2.1HG0055950	TCONS_00009579	tran	mRNA	X38_CK	X38_Cd	Up	6.1329e-15	5.06586e-12	1.55832
HORVU.MOREX.r2.3HG0265850	HORVU.MOREX.r2.3HG0265850.1	tran	mRNA	X38_CK	X38_Cd	Up	6.3167e-15	5.14522e-12	4.86253
HORVU.MOREX.r2.3HG0266030	HORVU.MOREX.r2.3HG0266030.1	tran	mRNA	X38_CK	X38_Cd	Up	7.41489e-15	5.957e-12	6.41326
HORVU.MOREX.r2.2HG0138840	HORVU.MOREX.r2.2HG0138840.1	tran	mRNA	X38_CK	X38_Cd	Up	8.64064e-15	6.84794e-12	1.36609
HORVU.MOREX.r2.1HG0049570	TCONS_00003553	tran	mRNA	X38_CK	X38_Cd	Up	1.31497e-14	1.02826e-11	0.964408
HORVU.MOREX.r2.2HG0093890	HORVU.MOREX.r2.2HG0093890.1	tran	mRNA	X38_CK	X38_Cd	Dw	1.4046e-14	1.08389e-11	-10.208
XLOC_047221	TCONS_00066781	tran	mRNA	X38_CK	X38_Cd	Dw	1.73514e-14	1.32157e-11	-1.60006
HORVU.MOREX.r2.2HG0120200	TCONS_00021457	tran	mRNA	X38_CK	X38_Cd	Dw	1.9472e-14	1.46407e-11	-1.83527
HORVU.MOREX.r2.4HG0342730	HORVU.MOREX.r2.4HG0342730.1	tran	mRNA	X38_CK	X38_Cd	Dw	2.1389e-14	1.58785e-11	-3.05252
HORVU.MOREX.r2.3HG0273580	HORVU.MOREX.r2.3HG0273580.1	tran	mRNA	X38_CK	X38_Cd	Up	2.4125e-14	1.76858e-11	2.44136
XLOC_036043	TCONS_00051009	tran	lncRNA	X38_CK	X38_Cd	Dw	2.52449e-14	1.82782e-11	-1.25788
HORVU.MOREX.r2.4HG0323970	HORVU.MOREX.r2.4HG0323970.1	tran	mRNA	X38_CK	X38_Cd	Up	2.97081e-14	2.12474e-11	2.58727
HORVU.MOREX.r2.2HG0132800	TCONS_00015008	tran	mRNA	X38_CK	X38_Cd	Up	3.8837e-14	2.74419e-11	11.2561
HORVU.MOREX.r2.1HG0000990	HORVU.MOREX.r2.1HG0000990.1	tran	mRNA	X38_CK	X38_Cd	Dw	7.42953e-14	5.18714e-11	-6.24593
XLOC_061439	TCONS_00086719	tran	lncRNA	X38_CK	X38_Cd	Dw	8.31472e-14	5.73686e-11	-1.0486
HORVU.MOREX.r2.5HG0444750	HORVU.MOREX.r2.5HG0444750.1	tran	mRNA	X38_CK	X38_Cd	Dw	9.10849e-14	6.21146e-11	-1.52021
XLOC_058707	TCONS_00082958	tran	lncRNA	X38_CK	X38_Cd	Dw	9.82115e-14	6.62047e-11	-3.24471
HORVU.MOREX.r2.3HG0233570	HORVU.MOREX.r2.3HG0233570.1	tran	mRNA	X38_CK	X38_Cd	Up	1.0013e-13	6.67307e-11	5.64993
HORVU.MOREX.r2.2HG0160110	TCONS_00016932	tran	mRNA	X38_CK	X38_Cd	Up	1.02722e-13	6.76894e-11	3.09733
HORVU.MOREX.r2.3HG0265810	TCONS_00031729	tran	mRNA	X38_CK	X38_Cd	Up	1.11443e-13	7.26202e-11	3.57146
HORVU.MOREX.r2.3HG0194210	TCONS_00033227	tran	mRNA	X38_CK	X38_Cd	Up	1.16349e-13	7.49836e-11	1.75417
HORVU.MOREX.r2.2HG0138520	TCONS_00022782	tran	mRNA	X38_CK	X38_Cd	Dw	1.5692e-13	1.00031e-10	-2.91792
HORVU.MOREX.r2.4HG0329540	TCONS_00043039	tran	mRNA	X38_CK	X38_Cd	Up	1.63966e-13	1.03399e-10	2.80859
HORVU.MOREX.r2.3HG0251980	HORVU.MOREX.r2.3HG0251980.1	tran	mRNA	X38_CK	X38_Cd	Up	1.93087e-13	1.20468e-10	1.92799
HORVU.MOREX.r2.5HG0424060	HORVU.MOREX.r2.5HG0424060.1	tran	mRNA	X38_CK	X38_Cd	Dw	2.1942e-13	1.34045e-10	-2.17418
HORVU.MOREX.r2.7HG0590510	HORVU.MOREX.r2.7HG0590510.1	tran	mRNA	X38_CK	X38_Cd	Up	2.18826e-13	1.34045e-10	1.24162
HORVU.MOREX.r2.4HG0345790	HORVU.MOREX.r2.4HG0345790.1	tran	mRNA	X38_CK	X38_Cd	Dw	2.35355e-13	1.42297e-10	-1.6459
HORVU.MOREX.r2.1HG0040660	HORVU.MOREX.r2.1HG0040660.1	tran	mRNA	X38_CK	X38_Cd	Up	2.64513e-13	1.58295e-10	2.79446
HORVU.MOREX.r2.5HG0381170	HORVU.MOREX.r2.5HG0381170.1	tran	mRNA	X38_CK	X38_Cd	Up	2.74169e-13	1.62416e-10	2.39056
HORVU.MOREX.r2.7HG0612270	HORVU.MOREX.r2.7HG0612270.1	tran	mRNA	X38_CK	X38_Cd	Dw	3.03269e-13	1.77858e-10	-10.5805
HORVU.MOREX.r2.1HG0040550	HORVU.MOREX.r2.1HG0040550.1	tran	mRNA	X38_CK	X38_Cd	Up	3.12412e-13	1.81406e-10	3.90284
HORVU.MOREX.r2.4HG0286260	TCONS_00045163	tran	mRNA	X38_CK	X38_Cd	Up	3.55895e-13	2.04629e-10	1.0074
HORVU.MOREX.r2.2HG0133200	HORVU.MOREX.r2.2HG0133200.1	tran	mRNA	X38_CK	X38_Cd	Dw	4.75556e-13	2.70776e-10	-1.88971
HORVU.MOREX.r2.3HG0187700	HORVU.MOREX.r2.3HG0187700.1	tran	mRNA	X38_CK	X38_Cd	Up	4.84609e-13	2.73278e-10	5.19693
HORVU.MOREX.r2.4HG0345780	HORVU.MOREX.r2.4HG0345780.1	tran	mRNA	X38_CK	X38_Cd	Dw	6.8466e-13	3.82412e-10	-1.3335
HORVU.MOREX.r2.2HG0096570	HORVU.MOREX.r2.2HG0096570.1	tran	mRNA	X38_CK	X38_Cd	Up	7.79509e-13	4.31282e-10	1.79183
XLOC_054731	TCONS_00077405	tran	lncRNA	X38_CK	X38_Cd	Up	9.8687e-13	5.40906e-10	1.77947
XLOC_048992	TCONS_00069163	tran	lncRNA	X38_CK	X38_Cd	Dw	1.05291e-12	5.71761e-10	-9.62418
XLOC_001200	TCONS_00001652	tran	lncRNA	X38_CK	X38_Cd	Dw	1.11465e-12	5.9973e-10	-1.81057
HORVU.MOREX.r2.6HG0506010	HORVU.MOREX.r2.6HG0506010.1	tran	mRNA	X38_CK	X38_Cd	Dw	1.15531e-12	6.15961e-10	-2.09705
HORVU.MOREX.r2.5HG0407460	TCONS_00053732	tran	mRNA	X38_CK	X38_Cd	Up	1.26933e-12	6.70651e-10	1.06964
HORVU.MOREX.r2.4HG0326300	HORVU.MOREX.r2.4HG0326300.1	tran	mRNA	X38_CK	X38_Cd	Up	1.33827e-12	7.00764e-10	5.46158
HORVU.MOREX.r2.1HG0026120	TCONS_00007575	tran	mRNA	X38_CK	X38_Cd	Dw	1.57147e-12	8.15594e-10	-9.84729
HORVU.MOREX.r2.5HG0401690	HORVU.MOREX.r2.5HG0401690.1	tran	mRNA	X38_CK	X38_Cd	Up	2.21072e-12	1.1373e-09	2.9343
HORVU.MOREX.r2.5HG0370710	TCONS_00051270	tran	mRNA	X38_CK	X38_Cd	Up	2.53047e-12	1.29048e-09	1.37407
HORVU.MOREX.r2.6HG0449380	TCONS_00063612	tran	mRNA	X38_CK	X38_Cd	Dw	3.13294e-12	1.58395e-09	-1.54085
HORVU.MOREX.r2.5HG0381160	TCONS_00051976	tran	mRNA	X38_CK	X38_Cd	Up	3.30343e-12	1.65586e-09	1.06345
HORVU.MOREX.r2.7HG0600140	TCONS_00086600	tran	mRNA	X38_CK	X38_Cd	Up	3.37516e-12	1.67749e-09	1.26248
HORVU.MOREX.r2.5HG0419010	HORVU.MOREX.r2.5HG0419010.1	tran	mRNA	X38_CK	X38_Cd	Dw	4.7675e-12	2.34958e-09	-2.30784
HORVU.MOREX.r2.1HG0033830	TCONS_00002446	tran	mRNA	X38_CK	X38_Cd	Up	6.88346e-12	3.36412e-09	0.877739
HORVU.MOREX.r2.5HG0396620	HORVU.MOREX.r2.5HG0396620.1	tran	mRNA	X38_CK	X38_Cd	Dw	7.06316e-12	3.42341e-09	-1.45428
HORVU.MOREX.r2.3HG0197320	HORVU.MOREX.r2.3HG0197320.1	tran	mRNA	X38_CK	X38_Cd	Up	8.37616e-12	4.02653e-09	6.07306
HORVU.MOREX.r2.1HG0067430	HORVU.MOREX.r2.1HG0067430.1	tran	mRNA	X38_CK	X38_Cd	Up	8.51557e-12	4.06027e-09	1.38147
HORVU.MOREX.r2.7HG0611240	TCONS_00087395	tran	mRNA	X38_CK	X38_Cd	Up	8.68525e-12	4.10777e-09	0.96056
HORVU.MOREX.r2.4HG0314730	TCONS_00047300	tran	mRNA	X38_CK	X38_Cd	Dw	1.01509e-11	4.76256e-09	-9.31503
HORVU.MOREX.r2.5HG0355150	TCONS_00056968	tran	lncRNA	X38_CK	X38_Cd	Dw	1.04216e-11	4.85076e-09	-4.51182
HORVU.MOREX.r2.3HG0239390	HORVU.MOREX.r2.3HG0239390.1	tran	mRNA	X38_CK	X38_Cd	Up	1.73032e-11	7.9904e-09	2.36307
HORVU.MOREX.r2.1HG0052390	TCONS_00009316	tran	mRNA	X38_CK	X38_Cd	Up	1.76517e-11	8.02498e-09	9.9735
HORVU.MOREX.r2.7HG0594910	TCONS_00086197	tran	mRNA	X38_CK	X38_Cd	Up	1.75871e-11	8.02498e-09	1.62397
HORVU.MOREX.r2.1HG0062530	TCONS_00004452	tran	mRNA	X38_CK	X38_Cd	Dw	2.13806e-11	9.64545e-09	-2.08653
HORVU.MOREX.r2.4HG0287080	TCONS_00039993	tran	mRNA	X38_CK	X38_Cd	Up	2.20631e-11	9.8695e-09	1.31214
HORVU.MOREX.r2.7HG0562980	TCONS_00077160	tran	mRNA	X38_CK	X38_Cd	Dw	2.22138e-11	9.8695e-09	-1.33084
HORVU.MOREX.r2.1HG0068220	HORVU.MOREX.r2.1HG0068220.1	tran	mRNA	X38_CK	X38_Cd	Up	2.37284e-11	1.04631e-08	4.52947
HORVU.MOREX.r2.7HG0622880	HORVU.MOREX.r2.7HG0622880.1	tran	mRNA	X38_CK	X38_Cd	Up	2.69599e-11	1.17994e-08	0.949189
HORVU.MOREX.r2.3HG0206730	TCONS_00027532	tran	mRNA	X38_CK	X38_Cd	Dw	2.72519e-11	1.18388e-08	-9.35269
HORVU.MOREX.r2.1HG0076230	TCONS_00010955	tran	mRNA	X38_CK	X38_Cd	Up	2.78233e-11	1.19982e-08	1.7345
HORVU.MOREX.r2.6HG0466630	TCONS_00070465	tran	mRNA	X38_CK	X38_Cd	Dw	3.04333e-11	1.30279e-08	-1.11784
HORVU.MOREX.r2.7HG0604160	TCONS_00080140	tran	mRNA	X38_CK	X38_Cd	Dw	3.07131e-11	1.30524e-08	-1.59488
HORVU.MOREX.r2.1HG0040060	TCONS_00002883	tran	mRNA	X38_CK	X38_Cd	Up	3.69747e-11	1.56004e-08	10.1186
HORVU.MOREX.r2.2HG0167170	HORVU.MOREX.r2.2HG0167170.1	tran	mRNA	X38_CK	X38_Cd	Dw	4.04309e-11	1.69368e-08	-1.71444
HORVU.MOREX.r2.2HG0093020	HORVU.MOREX.r2.2HG0093020.1	tran	mRNA	X38_CK	X38_Cd	Dw	4.6584e-11	1.9376e-08	-2.92209
HORVU.MOREX.r2.1HG0022710	TCONS_00007272	tran	lncRNA	X38_CK	X38_Cd	Dw	4.69405e-11	1.93868e-08	-9.10416
HORVU.MOREX.r2.1HG0053790	HORVU.MOREX.r2.1HG0053790.1	tran	mRNA	X38_CK	X38_Cd	Up	4.84032e-11	1.98511e-08	1.01985
HORVU.MOREX.r2.7HG0600140	HORVU.MOREX.r2.7HG0600140.1	tran	mRNA	X38_CK	X38_Cd	Up	6.26742e-11	2.55254e-08	1.38266
HORVU.MOREX.r2.3HG0275720	HORVU.MOREX.r2.3HG0275720.1	tran	mRNA	X38_CK	X38_Cd	Up	6.7895e-11	2.7461e-08	0.896639
HORVU.MOREX.r2.6HG0511640	HORVU.MOREX.r2.6HG0511640.1	tran	mRNA	X38_CK	X38_Cd	Up	6.93144e-11	2.7843e-08	3.31747
HORVU.MOREX.r2.2HG0143830	TCONS_00023151	tran	mRNA	X38_CK	X38_Cd	Up	7.03416e-11	2.80634e-08	9.8869
HORVU.MOREX.r2.3HG0201110	HORVU.MOREX.r2.3HG0201110.1	tran	mRNA	X38_CK	X38_Cd	Dw	7.68194e-11	3.04407e-08	-9.19462
HORVU.MOREX.r2.5HG0416230	HORVU.MOREX.r2.5HG0416230.1	tran	mRNA	X38_CK	X38_Cd	Up	9.03202e-11	3.55504e-08	2.58744
HORVU.MOREX.r2.1HG0022060	HORVU.MOREX.r2.1HG0022060.1	tran	mRNA	X38_CK	X38_Cd	Up	9.92345e-11	3.87987e-08	2.4937
HORVU.MOREX.r2.2HG0147240	TCONS_00023412	tran	mRNA	X38_CK	X38_Cd	Up	1.07448e-10	4.1732e-08	1.43065
HORVU.MOREX.r2.4HG0317050	TCONS_00042113	tran	mRNA	X38_CK	X38_Cd	Dw	1.13008e-10	4.36026e-08	-9.76295
HORVU.MOREX.r2.3HG0197310	HORVU.MOREX.r2.3HG0197310.1	tran	mRNA	X38_CK	X38_Cd	Up	1.18502e-10	4.54236e-08	5.09775
HORVU.MOREX.r2.7HG0608430	HORVU.MOREX.r2.7HG0608430.1	tran	mRNA	X38_CK	X38_Cd	Dw	1.27611e-10	4.85974e-08	-1.75495
HORVU.MOREX.r2.6HG0488210	TCONS_00066475	tran	mRNA	X38_CK	X38_Cd	Up	1.3882e-10	5.25249e-08	1.77317
HORVU.MOREX.r2.1HG0014650	HORVU.MOREX.r2.1HG0014650.1	tran	mRNA	X38_CK	X38_Cd	Dw	1.40782e-10	5.29257e-08	-1.61392
HORVU.MOREX.r2.2HG0096000	HORVU.MOREX.r2.2HG0096000.1	tran	mRNA	X38_CK	X38_Cd	Up	1.48123e-10	5.5331e-08	1.2211
HORVU.MOREX.r2.7HG0593100	TCONS_00079320	tran	mRNA	X38_CK	X38_Cd	Up	1.64858e-10	6.11927e-08	1.05475
XLOC_058915	TCONS_00083233	tran	lncRNA	X38_CK	X38_Cd	Up	1.77529e-10	6.54814e-08	2.52019
HORVU.MOREX.r2.7HG0606560	TCONS_00087067	tran	mRNA	X38_CK	X38_Cd	Dw	1.85605e-10	6.80325e-08	-3.44175
HORVU.MOREX.r2.7HG0624050	HORVU.MOREX.r2.7HG0624050.1	tran	mRNA	X38_CK	X38_Cd	Dw	1.90625e-10	6.94384e-08	-2.85324
HORVU.MOREX.r2.2HG0132760	HORVU.MOREX.r2.2HG0132760.1	tran	mRNA	X38_CK	X38_Cd	Up	2.23068e-10	8.07548e-08	4.6257
HORVU.MOREX.r2.4HG0283320	HORVU.MOREX.r2.4HG0283320.1	tran	mRNA	X38_CK	X38_Cd	Dw	2.36318e-10	8.50265e-08	-1.17409
HORVU.MOREX.r2.5HG0380690	HORVU.MOREX.r2.5HG0380690.1	tran	mRNA	X38_CK	X38_Cd	Up	2.51584e-10	8.99673e-08	2.99289
HORVU.MOREX.r2.6HG0508080	HORVU.MOREX.r2.6HG0508080.1	tran	mRNA	X38_CK	X38_Cd	Up	3.45241e-10	1.22711e-07	3.0092
HORVU.MOREX.r2.UnG0634240	TCONS_00089046	tran	mRNA	X38_CK	X38_Cd	Dw	3.62513e-10	1.28074e-07	-6.64979
HORVU.MOREX.r2.6HG0506500	TCONS_00067747	tran	mRNA	X38_CK	X38_Cd	Up	3.73893e-10	1.31304e-07	0.620191
HORVU.MOREX.r2.4HG0333660	HORVU.MOREX.r2.4HG0333660.1	tran	mRNA	X38_CK	X38_Cd	Up	4.01742e-10	1.40244e-07	2.44714
HORVU.MOREX.r2.7HG0549060	HORVU.MOREX.r2.7HG0549060.1	tran	mRNA	X38_CK	X38_Cd	Up	4.15124e-10	1.44058e-07	2.63765
HORVU.MOREX.r2.5HG0370710	HORVU.MOREX.r2.5HG0370710.1	tran	mRNA	X38_CK	X38_Cd	Up	4.2387e-10	1.46228e-07	1.23612
HORVU.MOREX.r2.4HG0332580	HORVU.MOREX.r2.4HG0332580.1	tran	mRNA	X38_CK	X38_Cd	Up	4.28564e-10	1.46983e-07	2.03008
HORVU.MOREX.r2.7HG0614610	TCONS_00080783	tran	lncRNA	X38_CK	X38_Cd	Up	4.31732e-10	1.47208e-07	0.947676
HORVU.MOREX.r2.7HG0563280	HORVU.MOREX.r2.7HG0563280.1	tran	mRNA	X38_CK	X38_Cd	Up	4.95764e-10	1.68064e-07	1.43367
HORVU.MOREX.r2.UnG0625040	TCONS_00088391	tran	mRNA	X38_CK	X38_Cd	Dw	4.9872e-10	1.68094e-07	-3.1293
HORVU.MOREX.r2.7HG0539360	TCONS_00082380	tran	mRNA	X38_CK	X38_Cd	Up	5.02044e-10	1.68248e-07	2.41192
HORVU.MOREX.r2.4HG0297880	TCONS_00046019	tran	mRNA	X38_CK	X38_Cd	Dw	5.06538e-10	1.6879e-07	-8.79242
HORVU.MOREX.r2.6HG0469530	HORVU.MOREX.r2.6HG0469530.1	tran	mRNA	X38_CK	X38_Cd	Up	5.15123e-10	1.7068e-07	2.82771
HORVU.MOREX.r2.3HG0238960	TCONS_00029864	tran	mRNA	X38_CK	X38_Cd	Up	5.98908e-10	1.97327e-07	2.0279
HORVU.MOREX.r2.4HG0286260	HORVU.MOREX.r2.4HG0286260.1	tran	mRNA	X38_CK	X38_Cd	Up	6.45315e-10	2.10466e-07	1.3021
XLOC_028479	TCONS_00040227	tran	lncRNA	X38_CK	X38_Cd	Dw	6.45964e-10	2.10466e-07	-1.27086
HORVU.MOREX.r2.3HG0239940	HORVU.MOREX.r2.3HG0239940.1	tran	mRNA	X38_CK	X38_Cd	Dw	6.74664e-10	2.18602e-07	-0.985199
HORVU.MOREX.r2.7HG0623210	TCONS_00088241	tran	mRNA	X38_CK	X38_Cd	Dw	7.16091e-10	2.30751e-07	-26.6716
HORVU.MOREX.r2.7HG0587540	HORVU.MOREX.r2.7HG0587540.1	tran	mRNA	X38_CK	X38_Cd	Up	7.2531e-10	2.32444e-07	1.1298
HORVU.MOREX.r2.5HG0439630	HORVU.MOREX.r2.5HG0439630.1	tran	mRNA	X38_CK	X38_Cd	Up	7.60191e-10	2.42298e-07	2.73599
HORVU.MOREX.r2.2HG0176040	HORVU.MOREX.r2.2HG0176040.1	tran	mRNA	X38_CK	X38_Cd	Up	7.8315e-10	2.48146e-07	1.40736
HORVU.MOREX.r2.7HG0551070	HORVU.MOREX.r2.7HG0551070.1	tran	mRNA	X38_CK	X38_Cd	Up	7.86998e-10	2.48146e-07	7.8653
HORVU.MOREX.r2.1HG0011640	TCONS_00006383	tran	mRNA	X38_CK	X38_Cd	Dw	7.94441e-10	2.49153e-07	-2.25668
HORVU.MOREX.r2.2HG0165150	HORVU.MOREX.r2.2HG0165150.1	tran	mRNA	X38_CK	X38_Cd	Dw	8.20241e-10	2.55876e-07	-2.92182
HORVU.MOREX.r2.6HG0455690	TCONS_00069666	tran	mRNA	X38_CK	X38_Cd	Dw	8.79564e-10	2.7293e-07	-9.09961
HORVU.MOREX.r2.6HG0507700	TCONS_00073318	tran	lncRNA	X38_CK	X38_Cd	Dw	8.844e-10	2.72986e-07	-1.22669
XLOC_013644	TCONS_00019184	tran	lncRNA	X38_CK	X38_Cd	Dw	8.94168e-10	2.74556e-07	-9.70043
HORVU.MOREX.r2.5HG0431600	HORVU.MOREX.r2.5HG0431600.1	tran	mRNA	X38_CK	X38_Cd	Up	9.3368e-10	2.85195e-07	5.43152
HORVU.MOREX.r2.3HG0272180	HORVU.MOREX.r2.3HG0272180.1	tran	mRNA	X38_CK	X38_Cd	Up	9.89459e-10	3.00253e-07	4.44881
HORVU.MOREX.r2.5HG0352810	HORVU.MOREX.r2.5HG0352810.1	tran	mRNA	X38_CK	X38_Cd	Dw	9.93214e-10	3.00253e-07	-1.60551
HORVU.MOREX.r2.2HG0138540	TCONS_00022788	tran	mRNA	X38_CK	X38_Cd	Dw	1.06595e-09	3.20589e-07	-1.19282
HORVU.MOREX.r2.4HG0340350	HORVU.MOREX.r2.4HG0340350.1	tran	mRNA	X38_CK	X38_Cd	Up	1.10291e-09	3.30011e-07	1.35339
HORVU.MOREX.r2.5HG0428800	HORVU.MOREX.r2.5HG0428800.1	tran	mRNA	X38_CK	X38_Cd	Dw	1.13903e-09	3.39089e-07	-1.94851
HORVU.MOREX.r2.2HG0101280	TCONS_00012720	tran	mRNA	X38_CK	X38_Cd	Dw	1.18833e-09	3.51981e-07	-5.13359
HORVU.MOREX.r2.1HG0001060	TCONS_00005625	tran	lncRNA	X38_CK	X38_Cd	Dw	1.26528e-09	3.72888e-07	-1.8755
HORVU.MOREX.r2.7HG0557160	HORVU.MOREX.r2.7HG0557160.1	tran	mRNA	X38_CK	X38_Cd	Up	1.34119e-09	3.93283e-07	2.23956
HORVU.MOREX.r2.5HG0360530	TCONS_00057340	tran	mRNA	X38_CK	X38_Cd	Up	1.37108e-09	3.98235e-07	9.83999
HORVU.MOREX.r2.7HG0579870	TCONS_00085169	tran	mRNA	X38_CK	X38_Cd	Dw	1.37166e-09	3.98235e-07	-9.01939
HORVU.MOREX.r2.1HG0050720	TCONS_00009190	tran	mRNA	X38_CK	X38_Cd	Up	1.40086e-09	4.04709e-07	1.19477
HORVU.MOREX.r2.2HG0146170	TCONS_00015946	tran	mRNA	X38_CK	X38_Cd	Up	1.43737e-09	4.13222e-07	0.976494
HORVU.MOREX.r2.2HG0172630	TCONS_00025089	tran	mRNA	X38_CK	X38_Cd	Up	1.44845e-09	4.14376e-07	0.884711
HORVU.MOREX.r2.2HG0166360	HORVU.MOREX.r2.2HG0166360.1	tran	mRNA	X38_CK	X38_Cd	Dw	1.46698e-09	4.17639e-07	-1.14823
HORVU.MOREX.r2.3HG0188950	TCONS_00026242	tran	mRNA	X38_CK	X38_Cd	Up	1.55626e-09	4.40918e-07	1.59321
HORVU.MOREX.r2.3HG0237390	HORVU.MOREX.r2.3HG0237390.1	tran	mRNA	X38_CK	X38_Cd	Dw	1.80775e-09	5.09706e-07	-1.42267
HORVU.MOREX.r2.5HG0398540	HORVU.MOREX.r2.5HG0398540.1	tran	mRNA	X38_CK	X38_Cd	Dw	1.9192e-09	5.38543e-07	-1.14972
HORVU.MOREX.r2.2HG0155090	HORVU.MOREX.r2.2HG0155090.1	tran	mRNA	X38_CK	X38_Cd	Dw	2.12534e-09	5.93546e-07	-2.99243
HORVU.MOREX.r2.6HG0507050	TCONS_00073269	tran	mRNA	X38_CK	X38_Cd	Up	2.24729e-09	6.24629e-07	0.776972
HORVU.MOREX.r2.1HG0040620	HORVU.MOREX.r2.1HG0040620.1	tran	mRNA	X38_CK	X38_Cd	Up	2.42645e-09	6.71245e-07	1.24402
HORVU.MOREX.r2.5HG0402280	HORVU.MOREX.r2.5HG0402280.1	tran	mRNA	X38_CK	X38_Cd	Up	2.61031e-09	7.18717e-07	0.948906
HORVU.MOREX.r2.2HG0163510	HORVU.MOREX.r2.2HG0163510.1	tran	mRNA	X38_CK	X38_Cd	Up	2.78857e-09	7.64211e-07	2.457
HORVU.MOREX.r2.2HG0180280	TCONS_00025623	tran	mRNA	X38_CK	X38_Cd	Dw	3.01876e-09	8.23447e-07	-2.13004
HORVU.MOREX.r2.4HG0337890	TCONS_00043685	tran	mRNA	X38_CK	X38_Cd	Dw	3.27658e-09	8.89638e-07	-2.39624
HORVU.MOREX.r2.5HG0353360	HORVU.MOREX.r2.5HG0353360.1	tran	mRNA	X38_CK	X38_Cd	Dw	3.59907e-09	9.72694e-07	-9.39415
HORVU.MOREX.r2.1HG0051280	HORVU.MOREX.r2.1HG0051280.1	tran	mRNA	X38_CK	X38_Cd	Up	3.83723e-09	1.0323e-06	0.811749
HORVU.MOREX.r2.3HG0197330	HORVU.MOREX.r2.3HG0197330.1	tran	mRNA	X38_CK	X38_Cd	Up	4.10403e-09	1.09904e-06	8.6586
HORVU.MOREX.r2.5HG0370570	TCONS_00058096	tran	mRNA	X38_CK	X38_Cd	Up	4.14231e-09	1.10425e-06	9.48778
HORVU.MOREX.r2.5HG0384540	HORVU.MOREX.r2.5HG0384540.1	tran	mRNA	X38_CK	X38_Cd	Up	4.20105e-09	1.11484e-06	1.84241
HORVU.MOREX.r2.3HG0259900	TCONS_00031309	tran	lncRNA	X38_CK	X38_Cd	Dw	4.37702e-09	1.1563e-06	-1.80559
HORVU.MOREX.r2.4HG0345840	HORVU.MOREX.r2.4HG0345840.1	tran	mRNA	X38_CK	X38_Cd	Dw	4.66905e-09	1.22792e-06	-0.924064
HORVU.MOREX.r2.5HG0367370	HORVU.MOREX.r2.5HG0367370.1	tran	mRNA	X38_CK	X38_Cd	Up	4.7632e-09	1.24709e-06	0.729815
HORVU.MOREX.r2.5HG0440960	TCONS_00063033	tran	mRNA	X38_CK	X38_Cd	Dw	4.80514e-09	1.25248e-06	-1.43169
HORVU.MOREX.r2.1HG0034250	TCONS_00002488	tran	mRNA	X38_CK	X38_Cd	Up	5.14557e-09	1.33527e-06	9.44703
HORVU.MOREX.r2.4HG0289350	HORVU.MOREX.r2.4HG0289350.1	tran	mRNA	X38_CK	X38_Cd	Up	5.1837e-09	1.33924e-06	0.851591
HORVU.MOREX.r2.7HG0624040	TCONS_00088301	tran	mRNA	X38_CK	X38_Cd	Dw	5.33259e-09	1.37167e-06	-1.19867
HORVU.MOREX.r2.5HG0351900	HORVU.MOREX.r2.5HG0351900.1	tran	mRNA	X38_CK	X38_Cd	Up	5.47766e-09	1.40283e-06	1.47397
HORVU.MOREX.r2.5HG0393070	HORVU.MOREX.r2.5HG0393070.1	tran	mRNA	X38_CK	X38_Cd	Dw	5.52499e-09	1.4088e-06	-25.2359
HORVU.MOREX.r2.4HG0293910	HORVU.MOREX.r2.4HG0293910.1	tran	mRNA	X38_CK	X38_Cd	Dw	5.75594e-09	1.46134e-06	-0.953476
HORVU.MOREX.r2.2HG0161910	TCONS_00017055	tran	mRNA	X38_CK	X38_Cd	Up	6.28875e-09	1.58973e-06	0.868462
HORVU.MOREX.r2.7HG0544160	TCONS_00082732	tran	lncRNA	X38_CK	X38_Cd	Up	6.66897e-09	1.67861e-06	1.9066
HORVU.MOREX.r2.2HG0158440	HORVU.MOREX.r2.2HG0158440.1	tran	mRNA	X38_CK	X38_Cd	Up	6.70931e-09	1.68154e-06	2.7229
HORVU.MOREX.r2.2HG0151170	HORVU.MOREX.r2.2HG0151170.1	tran	mRNA	X38_CK	X38_Cd	Up	6.92561e-09	1.72837e-06	2.44556
HORVU.MOREX.r2.3HG0224000	HORVU.MOREX.r2.3HG0224000.1	tran	mRNA	X38_CK	X38_Cd	Up	7.52213e-09	1.86928e-06	1.77849
HORVU.MOREX.r2.2HG0105380	HORVU.MOREX.r2.2HG0105380.1	tran	mRNA	X38_CK	X38_Cd	Up	7.61757e-09	1.88455e-06	1.22078
HORVU.MOREX.r2.2HG0129410	TCONS_00014747	tran	mRNA	X38_CK	X38_Cd	Dw	7.64785e-09	1.88455e-06	-25.0003
HORVU.MOREX.r2.2HG0143550	HORVU.MOREX.r2.2HG0143550.1	tran	mRNA	X38_CK	X38_Cd	Up	8.06292e-09	1.97027e-06	1.06843
HORVU.MOREX.r2.5HG0425520	TCONS_00054980	tran	mRNA	X38_CK	X38_Cd	Up	8.04316e-09	1.97027e-06	1.33367
HORVU.MOREX.r2.4HG0278150	HORVU.MOREX.r2.4HG0278150.1	tran	mRNA	X38_CK	X38_Cd	Dw	8.17078e-09	1.98835e-06	-1.81844
HORVU.MOREX.r2.2HG0088490	TCONS_00011912	tran	mRNA	X38_CK	X38_Cd	Dw	8.49433e-09	2.05758e-06	-8.53972
HORVU.MOREX.r2.6HG0504770	HORVU.MOREX.r2.6HG0504770.1	tran	mRNA	X38_CK	X38_Cd	Up	8.52543e-09	2.05758e-06	0.988713
HORVU.MOREX.r2.7HG0623220	TCONS_00081381	tran	mRNA	X38_CK	X38_Cd	Dw	8.63907e-09	2.07646e-06	-1.05262
HORVU.MOREX.r2.7HG0528520	TCONS_00081589	tran	mRNA	X38_CK	X38_Cd	Dw	9.08448e-09	2.1746e-06	-24.8747
HORVU.MOREX.r2.3HG0195950	TCONS_00026764	tran	mRNA	X38_CK	X38_Cd	Dw	9.42495e-09	2.24693e-06	-8.60608
HORVU.MOREX.r2.4HG0322450	HORVU.MOREX.r2.4HG0322450.1	tran	mRNA	X38_CK	X38_Cd	Up	9.5937e-09	2.2779e-06	3.9063
HORVU.MOREX.r2.7HG0586110	HORVU.MOREX.r2.7HG0586110.1	tran	mRNA	X38_CK	X38_Cd	Dw	9.86522e-09	2.33293e-06	-1.78731
HORVU.MOREX.r2.7HG0621170	HORVU.MOREX.r2.7HG0621170.1	tran	mRNA	X38_CK	X38_Cd	Up	1.16311e-08	2.73948e-06	1.15108
HORVU.MOREX.r2.5HG0390010	TCONS_00059587	tran	mRNA	X38_CK	X38_Cd	Up	1.20648e-08	2.83026e-06	9.27532
HORVU.MOREX.r2.5HG0361390	HORVU.MOREX.r2.5HG0361390.1	tran	mRNA	X38_CK	X38_Cd	Up	1.22086e-08	2.84376e-06	0.923793
HORVU.MOREX.r2.6HG0524320	TCONS_00074459	tran	mRNA	X38_CK	X38_Cd	Dw	1.22193e-08	2.84376e-06	-8.76693
HORVU.MOREX.r2.1HG0069140	TCONS_00004913	tran	mRNA	X38_CK	X38_Cd	Dw	1.2579e-08	2.90441e-06	-1.45807
HORVU.MOREX.r2.3HG0249170	HORVU.MOREX.r2.3HG0249170.1	tran	mRNA	X38_CK	X38_Cd	Dw	1.25499e-08	2.90441e-06	-2.42802
HORVU.MOREX.r2.2HG0100750	HORVU.MOREX.r2.2HG0100750.1	tran	mRNA	X38_CK	X38_Cd	Dw	1.35522e-08	3.11684e-06	-1.4522
HORVU.MOREX.r2.7HG0562470	TCONS_00083984	tran	mRNA	X38_CK	X38_Cd	Up	1.36632e-08	3.13009e-06	9.19364
HORVU.MOREX.r2.5HG0355150	TCONS_00056965	tran	lncRNA	X38_CK	X38_Cd	Dw	1.40857e-08	3.21433e-06	-6.17013
HORVU.MOREX.r2.6HG0465280	HORVU.MOREX.r2.6HG0465280.1	tran	mRNA	X38_CK	X38_Cd	Dw	1.48129e-08	3.36717e-06	-1.90932
HORVU.MOREX.r2.2HG0152820	HORVU.MOREX.r2.2HG0152820.1	tran	mRNA	X38_CK	X38_Cd	Up	1.48749e-08	3.36822e-06	1.70355
HORVU.MOREX.r2.7HG0624090	TCONS_00088318	tran	lncRNA	X38_CK	X38_Cd	Dw	1.49628e-08	3.37508e-06	-1.54912
HORVU.MOREX.r2.3HG0233680	TCONS_00036163	tran	mRNA	X38_CK	X38_Cd	Up	1.55085e-08	3.48479e-06	2.04976
HORVU.MOREX.r2.2HG0119490	TCONS_00021391	tran	lncRNA	X38_CK	X38_Cd	Dw	1.56969e-08	3.51364e-06	-8.72088
HORVU.MOREX.r2.7HG0612980	HORVU.MOREX.r2.7HG0612980.1	tran	mRNA	X38_CK	X38_Cd	Dw	1.66344e-08	3.70935e-06	-8.75943
HORVU.MOREX.r2.2HG0091570	HORVU.MOREX.r2.2HG0091570.1	tran	mRNA	X38_CK	X38_Cd	Up	1.73594e-08	3.85634e-06	0.578719
HORVU.MOREX.r2.4HG0319420	TCONS_00047635	tran	lncRNA	X38_CK	X38_Cd	Dw	1.7552e-08	3.88442e-06	-2.3777
HORVU.MOREX.r2.1HG0011320	TCONS_00006362	tran	mRNA	X38_CK	X38_Cd	Up	1.77785e-08	3.91422e-06	24.8244
HORVU.MOREX.r2.3HG0233680	HORVU.MOREX.r2.3HG0233680.1	tran	mRNA	X38_CK	X38_Cd	Up	1.78201e-08	3.91422e-06	1.60635
HORVU.MOREX.r2.6HG0475410	TCONS_00065497	tran	lncRNA	X38_CK	X38_Cd	Dw	1.81889e-08	3.98031e-06	-8.36863
HORVU.MOREX.r2.3HG0244950	HORVU.MOREX.r2.3HG0244950.1	tran	mRNA	X38_CK	X38_Cd	Dw	1.83116e-08	3.99228e-06	-2.06665
HORVU.MOREX.r2.5HG0369990	TCONS_00051233	tran	mRNA	X38_CK	X38_Cd	Dw	1.83974e-08	3.99612e-06	-8.36323
HORVU.MOREX.r2.2HG0153890	HORVU.MOREX.r2.2HG0153890.1	tran	mRNA	X38_CK	X38_Cd	Up	1.86192e-08	4.02938e-06	3.31871
HORVU.MOREX.r2.5HG0439070	TCONS_00055928	tran	mRNA	X38_CK	X38_Cd	Up	1.89027e-08	4.07568e-06	2.02808
HORVU.MOREX.r2.5HG0443030	TCONS_00056209	tran	mRNA	X38_CK	X38_Cd	Dw	1.91919e-08	4.12289e-06	-24.3222
HORVU.MOREX.r2.7HG0533640	TCONS_00081965	tran	mRNA	X38_CK	X38_Cd	Up	2.04345e-08	4.37379e-06	8.72447
HORVU.MOREX.r2.2HG0114530	HORVU.MOREX.r2.2HG0114530.1	tran	mRNA	X38_CK	X38_Cd	Up	2.05858e-08	4.38085e-06	2.4952
HORVU.MOREX.r2.4HG0330640	TCONS_00043107	tran	mRNA	X38_CK	X38_Cd	Up	2.06915e-08	4.38085e-06	0.804981
HORVU.MOREX.r2.6HG0463510	HORVU.MOREX.r2.6HG0463510.1	tran	mRNA	X38_CK	X38_Cd	Dw	2.06873e-08	4.38085e-06	-0.871508
HORVU.MOREX.r2.UnG0626010	TCONS_00088450	tran	mRNA	X38_CK	X38_Cd	Dw	2.281e-08	4.81201e-06	-4.76866
HORVU.MOREX.r2.6HG0508890	TCONS_00073398	tran	mRNA	X38_CK	X38_Cd	Dw	2.319e-08	4.87465e-06	-24.1805
HORVU.MOREX.r2.4HG0299040	TCONS_00040816	tran	lncRNA	X38_CK	X38_Cd	Dw	2.47417e-08	5.18223e-06	-0.962095
HORVU.MOREX.r2.3HG0247070	HORVU.MOREX.r2.3HG0247070.1	tran	mRNA	X38_CK	X38_Cd	Up	2.55507e-08	5.33265e-06	2.89343
HORVU.MOREX.r2.2HG0148940	TCONS_00023563	tran	mRNA	X38_CK	X38_Cd	Dw	2.57584e-08	5.35692e-06	-8.66337
HORVU.MOREX.r2.1HG0044300	TCONS_00008777	tran	mRNA	X38_CK	X38_Cd	Up	2.65043e-08	5.47323e-06	1.85355
HORVU.MOREX.r2.6HG0511800	HORVU.MOREX.r2.6HG0511800.1	tran	mRNA	X38_CK	X38_Cd	Up	2.65041e-08	5.47323e-06	3.31798
HORVU.MOREX.r2.2HG0140850	TCONS_00022948	tran	mRNA	X38_CK	X38_Cd	Up	2.66287e-08	5.47962e-06	9.01203
HORVU.MOREX.r2.2HG0179140	HORVU.MOREX.r2.2HG0179140.1	tran	mRNA	X38_CK	X38_Cd	Dw	2.71208e-08	5.5512e-06	-1.72004
HORVU.MOREX.r2.3HG0271660	TCONS_00038770	tran	mRNA	X38_CK	X38_Cd	Dw	2.71658e-08	5.5512e-06	-4.1956
HORVU.MOREX.r2.1HG0057890	HORVU.MOREX.r2.1HG0057890.1	tran	mRNA	X38_CK	X38_Cd	Up	2.78684e-08	5.67499e-06	2.50726
HORVU.MOREX.r2.2HG0116450	HORVU.MOREX.r2.2HG0116450.1	tran	mRNA	X38_CK	X38_Cd	Dw	2.82531e-08	5.73342e-06	-24.0319
HORVU.MOREX.r2.7HG0612510	TCONS_00087497	tran	mRNA	X38_CK	X38_Cd	Dw	2.87415e-08	5.79246e-06	-24.019
HORVU.MOREX.r2.7HG0612510	TCONS_00087498	tran	mRNA	X38_CK	X38_Cd	Dw	2.87415e-08	5.79246e-06	-24.019
HORVU.MOREX.r2.5HG0420200	TCONS_00054582	tran	mRNA	X38_CK	X38_Cd	Up	2.88674e-08	5.7979e-06	2.278
HORVU.MOREX.r2.3HG0265820	HORVU.MOREX.r2.3HG0265820.1	tran	mRNA	X38_CK	X38_Cd	Up	2.94697e-08	5.89866e-06	2.53643
XLOC_046048	TCONS_00065095	tran	lncRNA	X38_CK	X38_Cd	Up	2.96764e-08	5.91983e-06	2.58095
XLOC_022013	TCONS_00031100	tran	lncRNA	X38_CK	X38_Cd	Dw	3.16801e-08	6.29811e-06	-3.72778
HORVU.MOREX.r2.5HG0363530	HORVU.MOREX.r2.5HG0363530.1	tran	mRNA	X38_CK	X38_Cd	Dw	3.21976e-08	6.37937e-06	-8.55089
XLOC_013137	TCONS_00018466	tran	lncRNA	X38_CK	X38_Cd	Dw	3.23785e-08	6.39361e-06	-1.46556
HORVU.MOREX.r2.5HG0355170	TCONS_00056976	tran	mRNA	X38_CK	X38_Cd	Dw	3.27227e-08	6.43988e-06	-4.41113
HORVU.MOREX.r2.1HG0050820	HORVU.MOREX.r2.1HG0050820.1	tran	mRNA	X38_CK	X38_Cd	Dw	3.33479e-08	6.54097e-06	-1.98147
HORVU.MOREX.r2.7HG0588540	TCONS_00078994	tran	mRNA	X38_CK	X38_Cd	Up	3.35254e-08	6.55389e-06	1.879
HORVU.MOREX.r2.7HG0603990	TCONS_00086875	tran	mRNA	X38_CK	X38_Cd	Up	3.39594e-08	6.61356e-06	0.655659
HORVU.MOREX.r2.7HG0621090	HORVU.MOREX.r2.7HG0621090.1	tran	mRNA	X38_CK	X38_Cd	Dw	3.40562e-08	6.61356e-06	-3.61985
HORVU.MOREX.r2.6HG0508460	HORVU.MOREX.r2.6HG0508460.1	tran	mRNA	X38_CK	X38_Cd	Up	3.56387e-08	6.89803e-06	0.71607
HORVU.MOREX.r2.7HG0594910	HORVU.MOREX.r2.7HG0594910.1	tran	mRNA	X38_CK	X38_Cd	Up	3.87904e-08	7.48335e-06	2.62038
HORVU.MOREX.r2.1HG0057900	TCONS_00009687	tran	mRNA	X38_CK	X38_Cd	Up	3.99919e-08	7.68315e-06	1.63852
HORVU.MOREX.r2.6HG0448090	TCONS_00069159	tran	mRNA	X38_CK	X38_Cd	Dw	4.0088e-08	7.68315e-06	-8.32583
HORVU.MOREX.r2.4HG0286250	HORVU.MOREX.r2.4HG0286250.1	tran	mRNA	X38_CK	X38_Cd	Dw	4.03229e-08	7.70299e-06	-8.32525
HORVU.MOREX.r2.3HG0253220	HORVU.MOREX.r2.3HG0253220.1	tran	mRNA	X38_CK	X38_Cd	Up	4.09521e-08	7.73247e-06	0.753156
HORVU.MOREX.r2.4HG0321810	TCONS_00047776	tran	mRNA	X38_CK	X38_Cd	Up	4.10046e-08	7.73247e-06	1.14648
HORVU.MOREX.r2.UnG0631280	HORVU.MOREX.r2.UnG0631280.1	tran	mRNA	X38_CK	X38_Cd	Up	4.10026e-08	7.73247e-06	2.57079
HORVU.MOREX.r2.UnG0632100	HORVU.MOREX.r2.UnG0632100.1	tran	mRNA	X38_CK	X38_Cd	Up	4.10026e-08	7.73247e-06	2.57079
HORVU.MOREX.r2.5HG0355130	TCONS_00056946	tran	mRNA	X38_CK	X38_Cd	Dw	4.20427e-08	7.90281e-06	-4.15367
HORVU.MOREX.r2.5HG0373660	TCONS_00058341	tran	mRNA	X38_CK	X38_Cd	Dw	4.29558e-08	8.04865e-06	-0.885226
HORVU.MOREX.r2.5HG0360700	TCONS_00057351	tran	mRNA	X38_CK	X38_Cd	Dw	4.54809e-08	8.49465e-06	-9.20543
HORVU.MOREX.r2.3HG0200760	HORVU.MOREX.r2.3HG0200760.1	tran	mRNA	X38_CK	X38_Cd	Up	4.58922e-08	8.54425e-06	6.8498
HORVU.MOREX.r2.4HG0286320	TCONS_00045172	tran	mRNA	X38_CK	X38_Cd	Up	4.63262e-08	8.59776e-06	1.82983
HORVU.MOREX.r2.1HG0012470	TCONS_00006441	tran	mRNA	X38_CK	X38_Cd	Up	4.71566e-08	8.72427e-06	0.575085
HORVU.MOREX.r2.2HG0133200	TCONS_00022408	tran	mRNA	X38_CK	X38_Cd	Dw	4.74636e-08	8.75346e-06	-1.55699
HORVU.MOREX.r2.6HG0457060	TCONS_00064169	tran	mRNA	X38_CK	X38_Cd	Dw	4.86013e-08	8.93518e-06	-1.17275
HORVU.MOREX.r2.3HG0262410	TCONS_00038207	tran	lncRNA	X38_CK	X38_Cd	Dw	4.9127e-08	9.00359e-06	-2.95736
HORVU.MOREX.r2.2HG0098550	HORVU.MOREX.r2.2HG0098550.1	tran	mRNA	X38_CK	X38_Cd	Dw	4.97322e-08	9.08612e-06	-1.70373
HORVU.MOREX.r2.2HG0095300	HORVU.MOREX.r2.2HG0095300.1	tran	mRNA	X38_CK	X38_Cd	Up	5.01874e-08	9.14082e-06	1.33881
HORVU.MOREX.r2.3HG0231460	HORVU.MOREX.r2.3HG0231460.1	tran	mRNA	X38_CK	X38_Cd	Dw	5.04294e-08	9.15645e-06	-0.859016
HORVU.MOREX.r2.2HG0108310	HORVU.MOREX.r2.2HG0108310.1	tran	mRNA	X38_CK	X38_Cd	Up	5.06846e-08	9.17438e-06	0.777296
HORVU.MOREX.r2.5HG0355160	TCONS_00056969	tran	mRNA	X38_CK	X38_Cd	Dw	5.38274e-08	9.71327e-06	-4.81849
HORVU.MOREX.r2.2HG0116980	HORVU.MOREX.r2.2HG0116980.1	tran	mRNA	X38_CK	X38_Cd	Up	5.56059e-08	1.00034e-05	1.46293
HORVU.MOREX.r2.3HG0238520	HORVU.MOREX.r2.3HG0238520.1	tran	mRNA	X38_CK	X38_Cd	Up	5.58211e-08	1.00114e-05	0.775981
HORVU.MOREX.r2.6HG0520850	TCONS_00068699	tran	mRNA	X38_CK	X38_Cd	Up	5.69278e-08	1.01788e-05	1.41356
HORVU.MOREX.r2.3HG0187700	TCONS_00026165	tran	mRNA	X38_CK	X38_Cd	Up	5.7963e-08	1.03324e-05	3.62619
XLOC_050918	TCONS_00072029	tran	lncRNA	X38_CK	X38_Cd	Dw	5.93058e-08	1.05397e-05	-8.30352
HORVU.MOREX.r2.1HG0056380	HORVU.MOREX.r2.1HG0056380.1	tran	mRNA	X38_CK	X38_Cd	Up	6.1572e-08	1.08768e-05	0.907865
HORVU.MOREX.r2.5HG0404270	HORVU.MOREX.r2.5HG0404270.1	tran	mRNA	X38_CK	X38_Cd	Dw	6.15732e-08	1.08768e-05	-1.60353
HORVU.MOREX.r2.2HG0162300	TCONS_00024428	tran	mRNA	X38_CK	X38_Cd	Up	6.19659e-08	1.09133e-05	0.886146
HORVU.MOREX.r2.2HG0088830	TCONS_00019091	tran	mRNA	X38_CK	X38_Cd	Up	6.24464e-08	1.09649e-05	0.779603
HORVU.MOREX.r2.1HG0013370	HORVU.MOREX.r2.1HG0013370.1	tran	mRNA	X38_CK	X38_Cd	Up	6.28455e-08	1.10021e-05	1.69135
HORVU.MOREX.r2.2HG0121790	TCONS_00021593	tran	mRNA	X38_CK	X38_Cd	Dw	6.33563e-08	1.10257e-05	-0.738331
HORVU.MOREX.r2.5HG0398610	HORVU.MOREX.r2.5HG0398610.1	tran	mRNA	X38_CK	X38_Cd	Dw	6.33266e-08	1.10257e-05	-1.20593
HORVU.MOREX.r2.7HG0565250	HORVU.MOREX.r2.7HG0565250.1	tran	mRNA	X38_CK	X38_Cd	Dw	6.41715e-08	1.11345e-05	-1.8944
HORVU.MOREX.r2.5HG0429310	TCONS_00055237	tran	mRNA	X38_CK	X38_Cd	Up	6.61576e-08	1.14453e-05	4.59334
HORVU.MOREX.r2.5HG0410360	TCONS_00061016	tran	mRNA	X38_CK	X38_Cd	Dw	6.71218e-08	1.15779e-05	-1.32057
HORVU.MOREX.r2.2HG0105290	HORVU.MOREX.r2.2HG0105290.1	tran	mRNA	X38_CK	X38_Cd	Up	6.83389e-08	1.17533e-05	1.10421
HORVU.MOREX.r2.3HG0208240	TCONS_00034216	tran	mRNA	X38_CK	X38_Cd	Up	6.89936e-08	1.18312e-05	9.55986
HORVU.MOREX.r2.3HG0263830	HORVU.MOREX.r2.3HG0263830.1	tran	mRNA	X38_CK	X38_Cd	Dw	7.16874e-08	1.22573e-05	-1.53372
HORVU.MOREX.r2.5HG0392190	TCONS_00059775	tran	mRNA	X38_CK	X38_Cd	Up	7.27618e-08	1.24048e-05	0.916135
HORVU.MOREX.r2.5HG0350290	HORVU.MOREX.r2.5HG0350290.1	tran	mRNA	X38_CK	X38_Cd	Dw	7.60843e-08	1.28963e-05	-5.90077
HORVU.MOREX.r2.7HG0600240	HORVU.MOREX.r2.7HG0600240.1	tran	mRNA	X38_CK	X38_Cd	Up	7.604e-08	1.28963e-05	5.07426
HORVU.MOREX.r2.7HG0544790	TCONS_00082791	tran	mRNA	X38_CK	X38_Cd	Dw	7.86261e-08	1.32887e-05	-8.69238
HORVU.MOREX.r2.6HG0488210	TCONS_00066476	tran	mRNA	X38_CK	X38_Cd	Up	8.82423e-08	1.48711e-05	1.05614
HORVU.MOREX.r2.7HG0542850	TCONS_00082641	tran	mRNA	X38_CK	X38_Cd	Up	9.02171e-08	1.51604e-05	0.918839
HORVU.MOREX.r2.6HG0498460	HORVU.MOREX.r2.6HG0498460.1	tran	mRNA	X38_CK	X38_Cd	Dw	9.38082e-08	1.57188e-05	-1.68901
HORVU.MOREX.r2.3HG0255840	HORVU.MOREX.r2.3HG0255840.1	tran	mRNA	X38_CK	X38_Cd	Dw	9.61832e-08	1.60708e-05	-1.74466
HORVU.MOREX.r2.3HG0246920	TCONS_00030380	tran	mRNA	X38_CK	X38_Cd	Dw	1.0424e-07	1.73612e-05	-1.5894
HORVU.MOREX.r2.5HG0402390	HORVU.MOREX.r2.5HG0402390.1	tran	mRNA	X38_CK	X38_Cd	Up	1.04498e-07	1.73612e-05	4.1431
HORVU.MOREX.r2.3HG0272550	HORVU.MOREX.r2.3HG0272550.1	tran	mRNA	X38_CK	X38_Cd	Up	1.06522e-07	1.76475e-05	3.69215
HORVU.MOREX.r2.2HG0095640	HORVU.MOREX.r2.2HG0095640.1	tran	mRNA	X38_CK	X38_Cd	Up	1.07094e-07	1.76923e-05	0.853273
HORVU.MOREX.r2.2HG0095710	TCONS_00012354	tran	mRNA	X38_CK	X38_Cd	Up	1.09569e-07	1.80503e-05	1.04004
HORVU.MOREX.r2.3HG0264030	HORVU.MOREX.r2.3HG0264030.1	tran	mRNA	X38_CK	X38_Cd	Dw	1.10391e-07	1.80841e-05	-1.17118
HORVU.MOREX.r2.5HG0352030	HORVU.MOREX.r2.5HG0352030.1	tran	mRNA	X38_CK	X38_Cd	Up	1.10165e-07	1.80841e-05	3.20442
HORVU.MOREX.r2.3HG0263440	HORVU.MOREX.r2.3HG0263440.1	tran	mRNA	X38_CK	X38_Cd	Dw	1.10885e-07	1.81145e-05	-1.16239
HORVU.MOREX.r2.UnG0624710	HORVU.MOREX.r2.UnG0624710.1	tran	mRNA	X38_CK	X38_Cd	Up	1.1395e-07	1.85633e-05	1.30227
HORVU.MOREX.r2.2HG0155830	TCONS_00024015	tran	mRNA	X38_CK	X38_Cd	Up	1.14852e-07	1.86585e-05	2.06511
HORVU.MOREX.r2.1HG0041350	TCONS_00008574	tran	lncRNA	X38_CK	X38_Cd	Dw	1.15806e-07	1.87615e-05	-1.1154
HORVU.MOREX.r2.6HG0511810	HORVU.MOREX.r2.6HG0511810.1	tran	mRNA	X38_CK	X38_Cd	Up	1.17151e-07	1.89272e-05	2.82163
HORVU.MOREX.r2.2HG0141020	TCONS_00022961	tran	lncRNA	X38_CK	X38_Cd	Up	1.19406e-07	1.92384e-05	1.04564
HORVU.MOREX.r2.6HG0473430	HORVU.MOREX.r2.6HG0473430.1	tran	mRNA	X38_CK	X38_Cd	Up	1.22525e-07	1.96869e-05	1.74739
HORVU.MOREX.r2.5HG0389660	TCONS_00052524	tran	lncRNA	X38_CK	X38_Cd	Dw	1.23824e-07	1.98412e-05	-8.1341
HORVU.MOREX.r2.5HG0444620	HORVU.MOREX.r2.5HG0444620.1	tran	mRNA	X38_CK	X38_Cd	Up	1.26315e-07	2.01853e-05	0.750493
HORVU.MOREX.r2.1HG0038710	TCONS_00002807	tran	mRNA	X38_CK	X38_Cd	Up	1.2881e-07	2.05281e-05	0.546733
HORVU.MOREX.r2.4HG0280910	HORVU.MOREX.r2.4HG0280910.1	tran	mRNA	X38_CK	X38_Cd	Up	1.37413e-07	2.17806e-05	1.3693
HORVU.MOREX.r2.7HG0545680	HORVU.MOREX.r2.7HG0545680.1	tran	mRNA	X38_CK	X38_Cd	Up	1.37222e-07	2.17806e-05	1.79152
XLOC_022513	TCONS_00031801	tran	lncRNA	X38_CK	X38_Cd	Dw	1.54391e-07	2.44059e-05	-1.33742
HORVU.MOREX.r2.5HG0419800	TCONS_00054555	tran	mRNA	X38_CK	X38_Cd	Up	1.57954e-07	2.48353e-05	20.5393
HORVU.MOREX.r2.5HG0419800	TCONS_00054556	tran	mRNA	X38_CK	X38_Cd	Up	1.57954e-07	2.48353e-05	20.5393
HORVU.MOREX.r2.2HG0145130	TCONS_00023256	tran	mRNA	X38_CK	X38_Cd	Up	1.62479e-07	2.54784e-05	3.63135
HORVU.MOREX.r2.3HG0197300	HORVU.MOREX.r2.3HG0197300.1	tran	mRNA	X38_CK	X38_Cd	Up	1.63601e-07	2.55859e-05	2.3965
HORVU.MOREX.r2.3HG0242030	TCONS_00036769	tran	mRNA	X38_CK	X38_Cd	Up	1.66244e-07	2.59301e-05	20.5341
HORVU.MOREX.r2.2HG0111330	TCONS_00020760	tran	mRNA	X38_CK	X38_Cd	Up	1.69539e-07	2.63739e-05	1.49033
HORVU.MOREX.r2.5HG0440060	TCONS_00062980	tran	mRNA	X38_CK	X38_Cd	Up	1.71207e-07	2.65629e-05	1.24477
HORVU.MOREX.r2.5HG0425700	TCONS_00062034	tran	mRNA	X38_CK	X38_Cd	Dw	1.738e-07	2.68941e-05	-1.54576
HORVU.MOREX.r2.1HG0071270	TCONS_00005060	tran	mRNA	X38_CK	X38_Cd	Up	1.75128e-07	2.70283e-05	0.605752
HORVU.MOREX.r2.3HG0253050	HORVU.MOREX.r2.3HG0253050.1	tran	mRNA	X38_CK	X38_Cd	Up	1.77515e-07	2.73248e-05	0.976867
HORVU.MOREX.r2.4HG0326440	TCONS_00048051	tran	mRNA	X38_CK	X38_Cd	Dw	1.90049e-07	2.91775e-05	-1.75017
HORVU.MOREX.r2.5HG0417650	HORVU.MOREX.r2.5HG0417650.1	tran	mRNA	X38_CK	X38_Cd	Dw	1.92502e-07	2.94769e-05	-1.70775
HORVU.MOREX.r2.3HG0196100	TCONS_00033368	tran	mRNA	X38_CK	X38_Cd	Up	1.9301e-07	2.94778e-05	1.24643
HORVU.MOREX.r2.4HG0348750	TCONS_00049628	tran	mRNA	X38_CK	X38_Cd	Up	1.96548e-07	2.98777e-05	1.61902
XLOC_054839	TCONS_00077544	tran	lncRNA	X38_CK	X38_Cd	Dw	1.96648e-07	2.98777e-05	-1.89833
HORVU.MOREX.r2.5HG0411900	TCONS_00061103	tran	mRNA	X38_CK	X38_Cd	Up	1.97253e-07	2.98922e-05	0.856288
HORVU.MOREX.r2.6HG0465340	TCONS_00064773	tran	mRNA	X38_CK	X38_Cd	Up	1.98604e-07	3.00194e-05	1.69232
HORVU.MOREX.r2.1HG0017390	HORVU.MOREX.r2.1HG0017390.1	tran	mRNA	X38_CK	X38_Cd	Up	2.01116e-07	3.03209e-05	1.75633
HORVU.MOREX.r2.4HG0342250	TCONS_00049207	tran	mRNA	X38_CK	X38_Cd	Up	2.03123e-07	3.05451e-05	0.821876
HORVU.MOREX.r2.7HG0528460	TCONS_00074763	tran	mRNA	X38_CK	X38_Cd	Dw	2.1217e-07	3.18239e-05	-3.87877
HORVU.MOREX.r2.7HG0549680	TCONS_00076198	tran	mRNA	X38_CK	X38_Cd	Up	2.14351e-07	3.19874e-05	0.979295
XLOC_011834	TCONS_00016711	tran	lncRNA	X38_CK	X38_Cd	Dw	2.14072e-07	3.19874e-05	-1.05251
HORVU.MOREX.r2.4HG0333640	TCONS_00048603	tran	mRNA	X38_CK	X38_Cd	Up	2.17923e-07	3.23558e-05	1.90212
HORVU.MOREX.r2.5HG0361360	TCONS_00057470	tran	mRNA	X38_CK	X38_Cd	Up	2.17799e-07	3.23558e-05	1.22977
HORVU.MOREX.r2.3HG0273210	TCONS_00032231	tran	mRNA	X38_CK	X38_Cd	Up	2.25179e-07	3.33487e-05	20.4457
HORVU.MOREX.r2.5HG0356200	TCONS_00057053	tran	lncRNA	X38_CK	X38_Cd	Up	2.26404e-07	3.34456e-05	2.07527
HORVU.MOREX.r2.3HG0250850	TCONS_00037394	tran	mRNA	X38_CK	X38_Cd	Dw	2.2997e-07	3.38022e-05	-1.12066
XLOC_053637	TCONS_00075849	tran	lncRNA	X38_CK	X38_Cd	Dw	2.29746e-07	3.38022e-05	-1.20064
HORVU.MOREX.r2.3HG0265830	HORVU.MOREX.r2.3HG0265830.1	tran	mRNA	X38_CK	X38_Cd	Up	2.35694e-07	3.44706e-05	1.98653
HORVU.MOREX.r2.6HG0481200	TCONS_00071448	tran	mRNA	X38_CK	X38_Cd	Up	2.35289e-07	3.44706e-05	1.87518
HORVU.MOREX.r2.2HG0178990	HORVU.MOREX.r2.2HG0178990.1	tran	mRNA	X38_CK	X38_Cd	Dw	2.37871e-07	3.47026e-05	-2.34916
HORVU.MOREX.r2.2HG0137760	TCONS_00015372	tran	mRNA	X38_CK	X38_Cd	Up	2.40554e-07	3.50069e-05	20.4309
HORVU.MOREX.r2.7HG0560290	TCONS_00076953	tran	mRNA	X38_CK	X38_Cd	Up	2.41843e-07	3.51073e-05	8.05032
XLOC_023024	TCONS_00032540	tran	lncRNA	X38_CK	X38_Cd	Dw	2.43669e-07	3.52851e-05	-1.10326
HORVU.MOREX.r2.7HG0594260	HORVU.MOREX.r2.7HG0594260.1	tran	mRNA	X38_CK	X38_Cd	Up	2.62531e-07	3.79228e-05	1.72759
HORVU.MOREX.r2.3HG0221420	TCONS_00035290	tran	mRNA	X38_CK	X38_Cd	Up	2.71172e-07	3.90747e-05	22.667
HORVU.MOREX.r2.3HG0275320	HORVU.MOREX.r2.3HG0275320.1	tran	mRNA	X38_CK	X38_Cd	Up	2.79632e-07	4.00967e-05	2.20842
HORVU.MOREX.r2.7HG0620250	TCONS_00088034	tran	lncRNA	X38_CK	X38_Cd	Dw	2.79008e-07	4.00967e-05	-1.09977
HORVU.MOREX.r2.4HG0332780	HORVU.MOREX.r2.4HG0332780.1	tran	mRNA	X38_CK	X38_Cd	Up	2.82796e-07	4.04515e-05	2.00491
HORVU.MOREX.r2.2HG0083720	HORVU.MOREX.r2.2HG0083720.1	tran	mRNA	X38_CK	X38_Cd	Up	3.04251e-07	4.32043e-05	20.3624
HORVU.MOREX.r2.7HG0570130	TCONS_00084436	tran	mRNA	X38_CK	X38_Cd	Up	3.04251e-07	4.32043e-05	20.3624
HORVU.MOREX.r2.7HG0570130	TCONS_00084437	tran	mRNA	X38_CK	X38_Cd	Up	3.04251e-07	4.32043e-05	20.3624
HORVU.MOREX.r2.4HG0329890	TCONS_00043067	tran	mRNA	X38_CK	X38_Cd	Up	3.22228e-07	4.56466e-05	1.23869
HORVU.MOREX.r2.6HG0476990	HORVU.MOREX.r2.6HG0476990.1	tran	mRNA	X38_CK	X38_Cd	Up	3.35428e-07	4.7402e-05	3.2572
HORVU.MOREX.r2.1HG0074990	TCONS_00010866	tran	mRNA	X38_CK	X38_Cd	Up	3.38566e-07	4.77305e-05	1.7938
HORVU.MOREX.r2.2HG0174500	TCONS_00017943	tran	mRNA	X38_CK	X38_Cd	Up	3.43368e-07	4.82046e-05	0.6721
HORVU.MOREX.r2.4HG0297270	HORVU.MOREX.r2.4HG0297270.1	tran	mRNA	X38_CK	X38_Cd	Dw	3.43573e-07	4.82046e-05	-1.20585
HORVU.MOREX.r2.4HG0334640	TCONS_00048661	tran	mRNA	X38_CK	X38_Cd	Up	3.48186e-07	4.87352e-05	20.3072
HORVU.MOREX.r2.1HG0027480	HORVU.MOREX.r2.1HG0027480.1	tran	mRNA	X38_CK	X38_Cd	Up	3.54313e-07	4.94708e-05	0.919729
HORVU.MOREX.r2.4HG0322370	TCONS_00047803	tran	mRNA	X38_CK	X38_Cd	Up	3.55129e-07	4.94708e-05	0.894897
HORVU.MOREX.r2.2HG0150600	HORVU.MOREX.r2.2HG0150600.1	tran	mRNA	X38_CK	X38_Cd	Up	3.60558e-07	4.98718e-05	1.54367
HORVU.MOREX.r2.2HG0150610	HORVU.MOREX.r2.2HG0150610.1	tran	mRNA	X38_CK	X38_Cd	Up	3.60558e-07	4.98718e-05	1.54367
HORVU.MOREX.r2.UnG0631560	HORVU.MOREX.r2.UnG0631560.1	tran	mRNA	X38_CK	X38_Cd	Up	3.60558e-07	4.98718e-05	1.54367
HORVU.MOREX.r2.5HG0398560	HORVU.MOREX.r2.5HG0398560.1	tran	mRNA	X38_CK	X38_Cd	Dw	3.62462e-07	5.00173e-05	-1.33476
HORVU.MOREX.r2.5HG0441970	HORVU.MOREX.r2.5HG0441970.1	tran	mRNA	X38_CK	X38_Cd	Dw	3.78067e-07	5.20481e-05	-1.44191
HORVU.MOREX.r2.2HG0124350	TCONS_00014366	tran	lncRNA	X38_CK	X38_Cd	Dw	3.8218e-07	5.23684e-05	-2.18473
XLOC_050923	TCONS_00072042	tran	lncRNA	X38_CK	X38_Cd	Dw	3.81711e-07	5.23684e-05	-1.6946
HORVU.MOREX.r2.1HG0004640	TCONS_00000343	tran	mRNA	X38_CK	X38_Cd	Up	3.83994e-07	5.24943e-05	1.7265
HORVU.MOREX.r2.5HG0380660	HORVU.MOREX.r2.5HG0380660.1	tran	mRNA	X38_CK	X38_Cd	Up	3.8978e-07	5.31614e-05	0.999535
HORVU.MOREX.r2.2HG0126560	TCONS_00014528	tran	mRNA	X38_CK	X38_Cd	Dw	3.92824e-07	5.34524e-05	-6.53843
HORVU.MOREX.r2.4HG0321340	HORVU.MOREX.r2.4HG0321340.1	tran	mRNA	X38_CK	X38_Cd	Up	3.97175e-07	5.39193e-05	1.61276
HORVU.MOREX.r2.4HG0319870	HORVU.MOREX.r2.4HG0319870.1	tran	mRNA	X38_CK	X38_Cd	Up	3.98814e-07	5.40168e-05	1.8202
HORVU.MOREX.r2.5HG0398860	TCONS_00060218	tran	mRNA	X38_CK	X38_Cd	Up	4.1283e-07	5.57863e-05	0.957359
HORVU.MOREX.r2.3HG0239960	TCONS_00036593	tran	mRNA	X38_CK	X38_Cd	Dw	4.1768e-07	5.63119e-05	-1.27868
HORVU.MOREX.r2.5HG0362320	HORVU.MOREX.r2.5HG0362320.1	tran	mRNA	X38_CK	X38_Cd	Up	4.2399e-07	5.70315e-05	20.2493
HORVU.MOREX.r2.2HG0104270	HORVU.MOREX.r2.2HG0104270.1	tran	mRNA	X38_CK	X38_Cd	Up	4.26371e-07	5.72206e-05	1.12433
HORVU.MOREX.r2.3HG0211480	TCONS_00027875	tran	lncRNA	X38_CK	X38_Cd	Up	4.32127e-07	5.77737e-05	22.2789
HORVU.MOREX.r2.7HG0600330	HORVU.MOREX.r2.7HG0600330.1	tran	lncRNA	X38_CK	X38_Cd	Up	4.32463e-07	5.77737e-05	20.2154
HORVU.MOREX.r2.1HG0060940	HORVU.MOREX.r2.1HG0060940.1	tran	mRNA	X38_CK	X38_Cd	Up	4.40884e-07	5.87648e-05	1.5046
HORVU.MOREX.r2.1HG0051720	TCONS_00003719	tran	mRNA	X38_CK	X38_Cd	Up	4.55396e-07	6.04244e-05	20.2434
HORVU.MOREX.r2.5HG0429830	HORVU.MOREX.r2.5HG0429830.1	tran	mRNA	X38_CK	X38_Cd	Up	4.55203e-07	6.04244e-05	3.50499
HORVU.MOREX.r2.6HG0501820	HORVU.MOREX.r2.6HG0501820.1	tran	mRNA	X38_CK	X38_Cd	Up	4.60776e-07	6.10003e-05	0.997843
HORVU.MOREX.r2.2HG0078830	TCONS_00018364	tran	mRNA	X38_CK	X38_Cd	Up	4.64279e-07	6.13256e-05	20.2329
HORVU.MOREX.r2.4HG0321540	HORVU.MOREX.r2.4HG0321540.1	tran	mRNA	X38_CK	X38_Cd	Up	4.66182e-07	6.14386e-05	0.561177
HORVU.MOREX.r2.1HG0044470	HORVU.MOREX.r2.1HG0044470.1	tran	mRNA	X38_CK	X38_Cd	Up	4.77685e-07	6.28135e-05	1.85442
HORVU.MOREX.r2.3HG0231430	TCONS_00035998	tran	mRNA	X38_CK	X38_Cd	Up	5.09578e-07	6.68574e-05	0.784281
HORVU.MOREX.r2.2HG0168930	HORVU.MOREX.r2.2HG0168930.1	tran	mRNA	X38_CK	X38_Cd	Up	5.18835e-07	6.79199e-05	1.68505
HORVU.MOREX.r2.2HG0159340	TCONS_00016866	tran	mRNA	X38_CK	X38_Cd	Up	5.39788e-07	7.05054e-05	1.4786
HORVU.MOREX.r2.3HG0255110	TCONS_00037704	tran	mRNA	X38_CK	X38_Cd	Up	5.41575e-07	7.05817e-05	20.1894
HORVU.MOREX.r2.UnG0624270	TCONS_00088332	tran	lncRNA	X38_CK	X38_Cd	Dw	5.45743e-07	7.09672e-05	-3.62571
HORVU.MOREX.r2.4HG0304130	TCONS_00041170	tran	mRNA	X38_CK	X38_Cd	Dw	5.51612e-07	7.15717e-05	-1.90884
HORVU.MOREX.r2.3HG0258820	HORVU.MOREX.r2.3HG0258820.1	tran	mRNA	X38_CK	X38_Cd	Dw	5.61746e-07	7.27257e-05	-0.835839
HORVU.MOREX.r2.2HG0177900	HORVU.MOREX.r2.2HG0177900.1	tran	mRNA	X38_CK	X38_Cd	Up	5.64465e-07	7.29167e-05	1.89369
HORVU.MOREX.r2.5HG0430680	HORVU.MOREX.r2.5HG0430680.1	tran	mRNA	X38_CK	X38_Cd	Dw	5.73249e-07	7.38886e-05	-1.11828
HORVU.MOREX.r2.6HG0463280	TCONS_00070202	tran	mRNA	X38_CK	X38_Cd	Up	5.7859e-07	7.44135e-05	1.00723
HORVU.MOREX.r2.3HG0196590	HORVU.MOREX.r2.3HG0196590.1	tran	mRNA	X38_CK	X38_Cd	Up	5.83019e-07	7.48191e-05	1.61487
HORVU.MOREX.r2.2HG0104330	TCONS_00012899	tran	mRNA	X38_CK	X38_Cd	Up	5.92883e-07	7.59188e-05	1.37002
HORVU.MOREX.r2.1HG0010850	TCONS_00000807	tran	mRNA	X38_CK	X38_Cd	Up	5.99177e-07	7.65576e-05	0.866804
HORVU.MOREX.r2.4HG0283630	HORVU.MOREX.r2.4HG0283630.1	tran	mRNA	X38_CK	X38_Cd	Up	6.08352e-07	7.73927e-05	0.836682
XLOC_013315	TCONS_00018731	tran	lncRNA	X38_CK	X38_Cd	Up	6.07317e-07	7.73927e-05	8.03791
HORVU.MOREX.r2.5HG0434670	HORVU.MOREX.r2.5HG0434670.1	tran	mRNA	X38_CK	X38_Cd	Up	6.20132e-07	7.87205e-05	3.22665
HORVU.MOREX.r2.2HG0120200	TCONS_00021458	tran	mRNA	X38_CK	X38_Cd	Dw	6.42885e-07	8.14325e-05	-1.32439
HORVU.MOREX.r2.1HG0068070	TCONS_00010380	tran	mRNA	X38_CK	X38_Cd	Dw	6.46278e-07	8.16859e-05	-6.78082
HORVU.MOREX.r2.1HG0059820	HORVU.MOREX.r2.1HG0059820.1	tran	mRNA	X38_CK	X38_Cd	Dw	6.56023e-07	8.27393e-05	-1.35809
HORVU.MOREX.r2.2HG0111610	TCONS_00020777	tran	lncRNA	X38_CK	X38_Cd	Dw	6.7349e-07	8.476e-05	-1.44075
HORVU.MOREX.r2.7HG0589120	TCONS_00079044	tran	mRNA	X38_CK	X38_Cd	Up	6.86967e-07	8.6271e-05	1.14343
HORVU.MOREX.r2.6HG0523010	TCONS_00074345	tran	mRNA	X38_CK	X38_Cd	Up	6.95321e-07	8.71335e-05	8.04513
HORVU.MOREX.r2.6HG0457690	HORVU.MOREX.r2.6HG0457690.1	tran	mRNA	X38_CK	X38_Cd	Up	7.15252e-07	8.94401e-05	0.546908
HORVU.MOREX.r2.7HG0565730	TCONS_00077373	tran	mRNA	X38_CK	X38_Cd	Up	7.41428e-07	9.25161e-05	8.24007
HORVU.MOREX.r2.3HG0196880	HORVU.MOREX.r2.3HG0196880.1	tran	mRNA	X38_CK	X38_Cd	Up	7.4993e-07	9.31803e-05	3.99551
HORVU.MOREX.r2.6HG0471860	TCONS_00070865	tran	mRNA	X38_CK	X38_Cd	Dw	7.48984e-07	9.31803e-05	-0.855347
HORVU.MOREX.r2.3HG0250250	HORVU.MOREX.r2.3HG0250250.1	tran	mRNA	X38_CK	X38_Cd	Up	7.58012e-07	9.39855e-05	21.8025
HORVU.MOREX.r2.5HG0351760	TCONS_00049862	tran	mRNA	X38_CK	X38_Cd	Dw	7.74383e-07	9.58127e-05	-7.92299
HORVU.MOREX.r2.2HG0107530	TCONS_00013114	tran	mRNA	X38_CK	X38_Cd	Up	7.79201e-07	9.62059e-05	1.08817
HORVU.MOREX.r2.4HG0334640	TCONS_00048662	tran	mRNA	X38_CK	X38_Cd	Up	7.86426e-07	9.68939e-05	20.0714
HORVU.MOREX.r2.7HG0617570	TCONS_00080986	tran	mRNA	X38_CK	X38_Cd	Dw	8.02223e-07	9.86331e-05	-8.01726
HORVU.MOREX.r2.1HG0024240	HORVU.MOREX.r2.1HG0024240.1	tran	mRNA	X38_CK	X38_Cd	Up	8.09235e-07	9.9287e-05	1.59838
HORVU.MOREX.r2.2HG0162950	TCONS_00024481	tran	mRNA	X38_CK	X38_Cd	Up	8.23697e-07	0.00010085	1.08956
HORVU.MOREX.r2.6HG0500000	HORVU.MOREX.r2.6HG0500000.1	tran	mRNA	X38_CK	X38_Cd	Dw	8.42059e-07	0.000102884	-0.627885
HORVU.MOREX.r2.1HG0061800	HORVU.MOREX.r2.1HG0061800.1	tran	mRNA	X38_CK	X38_Cd	Up	8.80732e-07	0.000107385	0.812458
HORVU.MOREX.r2.6HG0468070	TCONS_00064949	tran	mRNA	X38_CK	X38_Cd	Up	8.83103e-07	0.000107451	21.6714
HORVU.MOREX.r2.3HG0194210	HORVU.MOREX.r2.3HG0194210.1	tran	mRNA	X38_CK	X38_Cd	Up	8.8821e-07	0.000107848	1.67925
HORVU.MOREX.r2.3HG0220590	TCONS_00035202	tran	lncRNA	X38_CK	X38_Cd	Up	8.926e-07	0.000108158	1.20178
HORVU.MOREX.r2.6HG0513490	HORVU.MOREX.r2.6HG0513490.1	tran	mRNA	X38_CK	X38_Cd	Up	9.07752e-07	0.000109541	0.739611
XLOC_019568	TCONS_00027611	tran	lncRNA	X38_CK	X38_Cd	Dw	9.06676e-07	0.000109541	-1.19062
HORVU.MOREX.r2.7HG0557110	TCONS_00083594	tran	mRNA	X38_CK	X38_Cd	Up	9.20319e-07	0.000110829	1.06019
HORVU.MOREX.r2.4HG0318250	TCONS_00042192	tran	mRNA	X38_CK	X38_Cd	Up	9.22516e-07	0.000110866	0.581245
HORVU.MOREX.r2.2HG0098020	TCONS_00019804	tran	mRNA	X38_CK	X38_Cd	Up	9.30329e-07	0.000111349	0.920997
HORVU.MOREX.r2.5HG0414110	TCONS_00061251	tran	mRNA	X38_CK	X38_Cd	Up	9.29655e-07	0.000111349	1.55667
HORVU.MOREX.r2.5HG0355150	TCONS_00056972	tran	lncRNA	X38_CK	X38_Cd	Dw	9.4883e-07	0.000113332	-3.40096
HORVU.MOREX.r2.7HG0624010	TCONS_00081439	tran	mRNA	X38_CK	X38_Cd	Dw	9.7595e-07	0.000116334	-2.83178
HORVU.MOREX.r2.5HG0396330	HORVU.MOREX.r2.5HG0396330.1	tran	mRNA	X38_CK	X38_Cd	Up	9.95308e-07	0.000118401	2.2206
HORVU.MOREX.r2.5HG0407660	TCONS_00053739	tran	mRNA	X38_CK	X38_Cd	Up	1.03068e-06	0.00012236	1.01306
HORVU.MOREX.r2.1HG0051770	TCONS_00009261	tran	mRNA	X38_CK	X38_Cd	Up	1.05612e-06	0.000125128	21.5159
HORVU.MOREX.r2.4HG0329890	HORVU.MOREX.r2.4HG0329890.1	tran	mRNA	X38_CK	X38_Cd	Up	1.05994e-06	0.000125327	1.03682
HORVU.MOREX.r2.7HG0537750	HORVU.MOREX.r2.7HG0537750.1	tran	mRNA	X38_CK	X38_Cd	Up	1.0759e-06	0.000126958	1.79369
HORVU.MOREX.r2.1HG0015920	HORVU.MOREX.r2.1HG0015920.1	tran	mRNA	X38_CK	X38_Cd	Up	1.08035e-06	0.000126972	21.4972
HORVU.MOREX.r2.4HG0332200	TCONS_00048478	tran	mRNA	X38_CK	X38_Cd	Up	1.07883e-06	0.000126972	7.94315
HORVU.MOREX.r2.UnG0628510	TCONS_00089600	tran	lncRNA	X38_CK	X38_Cd	Up	1.08371e-06	0.000127113	21.4945
HORVU.MOREX.r2.5HG0355100	TCONS_00056935	tran	mRNA	X38_CK	X38_Cd	Dw	1.09505e-06	0.000128187	-7.87559
HORVU.MOREX.r2.1HG0040630	HORVU.MOREX.r2.1HG0040630.1	tran	mRNA	X38_CK	X38_Cd	Up	1.10192e-06	0.000128733	4.12633
HORVU.MOREX.r2.4HG0342490	HORVU.MOREX.r2.4HG0342490.1	tran	mRNA	X38_CK	X38_Cd	Up	1.10924e-06	0.000129161	1.24431
HORVU.MOREX.r2.5HG0375670	TCONS_00058496	tran	lncRNA	X38_CK	X38_Cd	Up	1.10998e-06	0.000129161	4.2486
HORVU.MOREX.r2.2HG0176780	HORVU.MOREX.r2.2HG0176780.1	tran	mRNA	X38_CK	X38_Cd	Up	1.11955e-06	0.000130016	0.674598
HORVU.MOREX.r2.7HG0618380	HORVU.MOREX.r2.7HG0618380.1	tran	mRNA	X38_CK	X38_Cd	Dw	1.13688e-06	0.000131768	-2.4163
XLOC_024259	TCONS_00034284	tran	lncRNA	X38_CK	X38_Cd	Dw	1.15071e-06	0.000133108	-1.1141
HORVU.MOREX.r2.5HG0414770	HORVU.MOREX.r2.5HG0414770.1	tran	mRNA	X38_CK	X38_Cd	Up	1.15455e-06	0.000133289	1.93405
HORVU.MOREX.r2.2HG0105340	HORVU.MOREX.r2.2HG0105340.1	tran	mRNA	X38_CK	X38_Cd	Up	1.15792e-06	0.000133416	1.14092
HORVU.MOREX.r2.3HG0216740	TCONS_00034918	tran	mRNA	X38_CK	X38_Cd	Up	1.17215e-06	0.00013479	8.30115
HORVU.MOREX.r2.1HG0041330	TCONS_00008571	tran	mRNA	X38_CK	X38_Cd	Up	1.17826e-06	0.000135228	1.12917
HORVU.MOREX.r2.4HG0338430	HORVU.MOREX.r2.4HG0338430.1	tran	mRNA	X38_CK	X38_Cd	Up	1.19541e-06	0.000136928	1.96299
HORVU.MOREX.r2.2HG0095020	HORVU.MOREX.r2.2HG0095020.1	tran	mRNA	X38_CK	X38_Cd	Up	1.19901e-06	0.000137073	2.23512
HORVU.MOREX.r2.7HG0622310	HORVU.MOREX.r2.7HG0622310.1	tran	mRNA	X38_CK	X38_Cd	Dw	1.20643e-06	0.000137653	-1.6717
HORVU.MOREX.r2.1HG0057910	TCONS_00004129	tran	mRNA	X38_CK	X38_Cd	Up	1.21938e-06	0.00013886	1.29489
HORVU.MOREX.r2.1HG0052940	TCONS_00009353	tran	mRNA	X38_CK	X38_Cd	Up	1.23168e-06	0.00013999	0.465545
HORVU.MOREX.r2.7HG0557310	HORVU.MOREX.r2.7HG0557310.1	tran	mRNA	X38_CK	X38_Cd	Up	1.24569e-06	0.000141308	1.17264
HORVU.MOREX.r2.5HG0440960	TCONS_00063032	tran	mRNA	X38_CK	X38_Cd	Dw	1.25838e-06	0.000142471	-1.67859
HORVU.MOREX.r2.2HG0091450	TCONS_00019304	tran	mRNA	X38_CK	X38_Cd	Up	1.32969e-06	0.000150255	1.797
HORVU.MOREX.r2.3HG0248650	HORVU.MOREX.r2.3HG0248650.1	tran	mRNA	X38_CK	X38_Cd	Dw	1.41145e-06	0.000159187	-1.01958
HORVU.MOREX.r2.7HG0526920	HORVU.MOREX.r2.7HG0526920.1	tran	mRNA	X38_CK	X38_Cd	Up	1.44108e-06	0.000162217	1.19374
HORVU.MOREX.r2.3HG0246920	HORVU.MOREX.r2.3HG0246920.1	tran	mRNA	X38_CK	X38_Cd	Dw	1.45221e-06	0.000163157	-1.38744
HORVU.MOREX.r2.5HG0380730	TCONS_00058873	tran	mRNA	X38_CK	X38_Cd	Dw	1.46655e-06	0.000164452	-1.6445
HORVU.MOREX.r2.2HG0102730	TCONS_00020150	tran	mRNA	X38_CK	X38_Cd	Dw	1.48841e-06	0.000166585	-1.23092
XLOC_063971	TCONS_00090145	tran	lncRNA	X38_CK	X38_Cd	Up	1.49349e-06	0.000166836	4.75215
XLOC_059806	TCONS_00084416	tran	lncRNA	X38_CK	X38_Cd	Up	1.50443e-06	0.000167738	21.2079
HORVU.MOREX.r2.5HG0399830	HORVU.MOREX.r2.5HG0399830.1	tran	mRNA	X38_CK	X38_Cd	Up	1.51902e-06	0.000169044	2.44878
HORVU.MOREX.r2.6HG0463670	TCONS_00064625	tran	mRNA	X38_CK	X38_Cd	Up	1.53673e-06	0.000170575	1.32602
HORVU.MOREX.r2.7HG0593420	HORVU.MOREX.r2.7HG0593420.1	tran	mRNA	X38_CK	X38_Cd	Dw	1.5386e-06	0.000170575	-2.5314
XLOC_063992	TCONS_00090166	tran	lncRNA	X38_CK	X38_Cd	Dw	1.551e-06	0.000171626	-1.31162
HORVU.MOREX.r2.3HG0197190	TCONS_00026867	tran	mRNA	X38_CK	X38_Cd	Up	1.55431e-06	0.000171668	21.1798
HORVU.MOREX.r2.5HG0397590	HORVU.MOREX.r2.5HG0397590.1	tran	mRNA	X38_CK	X38_Cd	Dw	1.58534e-06	0.000174766	-1.42461
HORVU.MOREX.r2.1HG0066510	HORVU.MOREX.r2.1HG0066510.1	tran	mRNA	X38_CK	X38_Cd	Up	1.6027e-06	0.000176348	2.67136
HORVU.MOREX.r2.4HG0340630	HORVU.MOREX.r2.4HG0340630.1	tran	mRNA	X38_CK	X38_Cd	Up	1.61654e-06	0.000177538	1.5386
HORVU.MOREX.r2.3HG0266100	HORVU.MOREX.r2.3HG0266100.1	tran	mRNA	X38_CK	X38_Cd	Up	1.6594e-06	0.000181905	8.60319
XLOC_000089	TCONS_00000133	tran	lncRNA	X38_CK	X38_Cd	Dw	1.67092e-06	0.000182825	-2.07672
HORVU.MOREX.r2.5HG0409280	TCONS_00060934	tran	mRNA	X38_CK	X38_Cd	Up	1.6763e-06	0.000183072	0.855901
HORVU.MOREX.r2.4HG0279680	TCONS_00044700	tran	mRNA	X38_CK	X38_Cd	Up	1.68586e-06	0.000183774	8.32434
HORVU.MOREX.r2.5HG0420510	TCONS_00054604	tran	mRNA	X38_CK	X38_Cd	Up	1.68901e-06	0.000183777	0.897926
HORVU.MOREX.r2.1HG0016780	TCONS_00001181	tran	mRNA	X38_CK	X38_Cd	Up	1.74453e-06	0.000189466	0.830991
HORVU.MOREX.r2.2HG0125080	TCONS_00021858	tran	mRNA	X38_CK	X38_Cd	Up	1.75661e-06	0.000190425	21.0679
HORVU.MOREX.r2.7HG0559350	TCONS_00076878	tran	mRNA	X38_CK	X38_Cd	Up	1.77188e-06	0.000191726	21.0645
HORVU.MOREX.r2.7HG0592110	TCONS_00086004	tran	mRNA	X38_CK	X38_Cd	Up	1.79054e-06	0.000193388	0.895111
HORVU.MOREX.r2.4HG0283290	TCONS_00039706	tran	mRNA	X38_CK	X38_Cd	Dw	1.83146e-06	0.000197082	-7.95375
HORVU.MOREX.r2.5HG0420200	HORVU.MOREX.r2.5HG0420200.1	tran	mRNA	X38_CK	X38_Cd	Up	1.83146e-06	0.000197082	1.73684
HORVU.MOREX.r2.1HG0058340	TCONS_00009718	tran	lncRNA	X38_CK	X38_Cd	Up	1.84887e-06	0.000198591	0.731708
HORVU.MOREX.r2.7HG0552220	TCONS_00083316	tran	mRNA	X38_CK	X38_Cd	Up	1.86936e-06	0.000200425	0.573518
HORVU.MOREX.r2.5HG0357560	HORVU.MOREX.r2.5HG0357560.1	tran	mRNA	X38_CK	X38_Cd	Dw	1.88452e-06	0.000201681	-2.06798
HORVU.MOREX.r2.4HG0347310	HORVU.MOREX.r2.4HG0347310.1	tran	mRNA	X38_CK	X38_Cd	Up	1.89271e-06	0.000202189	1.79092
HORVU.MOREX.r2.5HG0367990	HORVU.MOREX.r2.5HG0367990.1	tran	mRNA	X38_CK	X38_Cd	Up	1.91847e-06	0.000203827	0.703796
HORVU.MOREX.r2.7HG0562850	HORVU.MOREX.r2.7HG0562850.1	tran	mRNA	X38_CK	X38_Cd	Up	1.91609e-06	0.000203827	8.36731
HORVU.MOREX.r2.7HG0565370	TCONS_00084141	tran	mRNA	X38_CK	X38_Cd	Up	1.91508e-06	0.000203827	20.9958
HORVU.MOREX.r2.4HG0295470	TCONS_00045824	tran	mRNA	X38_CK	X38_Cd	Up	1.94881e-06	0.000206676	1.08693
HORVU.MOREX.r2.5HG0392250	HORVU.MOREX.r2.5HG0392250.1	tran	mRNA	X38_CK	X38_Cd	Up	1.99811e-06	0.000211141	4.75279
HORVU.MOREX.r2.5HG0444030	TCONS_00063228	tran	mRNA	X38_CK	X38_Cd	Up	1.99685e-06	0.000211141	1.17767
HORVU.MOREX.r2.1HG0048940	TCONS_00009085	tran	lncRNA	X38_CK	X38_Cd	Dw	2.02704e-06	0.000213812	-1.61547
HORVU.MOREX.r2.7HG0619420	TCONS_00087979	tran	mRNA	X38_CK	X38_Cd	Up	2.09295e-06	0.000220368	0.939508
HORVU.MOREX.r2.4HG0288590	HORVU.MOREX.r2.4HG0288590.1	tran	mRNA	X38_CK	X38_Cd	Up	2.098e-06	0.000220504	2.00388
HORVU.MOREX.r2.1HG0074270	TCONS_00010801	tran	mRNA	X38_CK	X38_Cd	Dw	2.10783e-06	0.000221141	-8.00445
HORVU.MOREX.r2.3HG0225480	HORVU.MOREX.r2.3HG0225480.1	tran	mRNA	X38_CK	X38_Cd	Up	2.16615e-06	0.000226854	0.759091
XLOC_032897	TCONS_00046588	tran	lncRNA	X38_CK	X38_Cd	Dw	2.24195e-06	0.000234374	-7.53415
HORVU.MOREX.r2.5HG0439690	HORVU.MOREX.r2.5HG0439690.1	tran	mRNA	X38_CK	X38_Cd	Dw	2.24721e-06	0.000234505	-1.17755
HORVU.MOREX.r2.2HG0158400	TCONS_00024166	tran	mRNA	X38_CK	X38_Cd	Up	2.2636e-06	0.000235796	1.11858
HORVU.MOREX.r2.5HG0410360	TCONS_00061014	tran	mRNA	X38_CK	X38_Cd	Dw	2.27751e-06	0.000236825	-1.07957
HORVU.MOREX.r2.1HG0074210	TCONS_00010789	tran	mRNA	X38_CK	X38_Cd	Up	2.29429e-06	0.000238147	20.8353
HORVU.MOREX.r2.3HG0230250	TCONS_00035911	tran	mRNA	X38_CK	X38_Cd	Up	2.3136e-06	0.000239727	0.772626
HORVU.MOREX.r2.2HG0139240	HORVU.MOREX.r2.2HG0139240.1	tran	mRNA	X38_CK	X38_Cd	Up	2.3262e-06	0.000240577	0.723834
XLOC_024386	TCONS_00034465	tran	lncRNA	X38_CK	X38_Cd	Dw	2.33e-06	0.000240577	-1.26534
HORVU.MOREX.r2.1HG0020300	TCONS_00001410	tran	mRNA	X38_CK	X38_Cd	Up	2.37559e-06	0.000244547	1.09355
HORVU.MOREX.r2.4HG0335470	TCONS_00043460	tran	mRNA	X38_CK	X38_Cd	Dw	2.37679e-06	0.000244547	-1.31404
HORVU.MOREX.r2.3HG0242710	HORVU.MOREX.r2.3HG0242710.1	tran	mRNA	X38_CK	X38_Cd	Up	2.40409e-06	0.000246922	1.20525
HORVU.MOREX.r2.1HG0032340	HORVU.MOREX.r2.1HG0032340.1	tran	mRNA	X38_CK	X38_Cd	Up	2.41036e-06	0.000247133	0.985777
HORVU.MOREX.r2.4HG0283660	TCONS_00044963	tran	mRNA	X38_CK	X38_Cd	Up	2.41561e-06	0.00024724	0.93615
HORVU.MOREX.r2.3HG0184790	HORVU.MOREX.r2.3HG0184790.1	tran	mRNA	X38_CK	X38_Cd	Dw	2.42687e-06	0.00024796	-1.50818
HORVU.MOREX.r2.4HG0313720	TCONS_00041872	tran	mRNA	X38_CK	X38_Cd	Up	2.4339e-06	0.000248245	20.7805
HORVU.MOREX.r2.4HG0301050	TCONS_00046326	tran	mRNA	X38_CK	X38_Cd	Up	2.48329e-06	0.000252843	8.92924
XLOC_051168	TCONS_00072370	tran	lncRNA	X38_CK	X38_Cd	Dw	2.54704e-06	0.000258885	-1.2706
HORVU.MOREX.r2.5HG0418300	HORVU.MOREX.r2.5HG0418300.1	tran	mRNA	X38_CK	X38_Cd	Dw	2.57563e-06	0.000261337	-1.76263
HORVU.MOREX.r2.3HG0221410	HORVU.MOREX.r2.3HG0221410.1	tran	mRNA	X38_CK	X38_Cd	Up	2.60532e-06	0.000263893	20.7219
HORVU.MOREX.r2.6HG0477260	HORVU.MOREX.r2.6HG0477260.1	tran	mRNA	X38_CK	X38_Cd	Up	2.63352e-06	0.000266289	1.34856
HORVU.MOREX.r2.6HG0455690	TCONS_00069656	tran	mRNA	X38_CK	X38_Cd	Up	2.72097e-06	0.000274659	20.683
HORVU.MOREX.r2.7HG0621810	HORVU.MOREX.r2.7HG0621810.1	tran	mRNA	X38_CK	X38_Cd	Dw	2.74477e-06	0.000276585	-1.47131
HORVU.MOREX.r2.2HG0155630	TCONS_00016593	tran	mRNA	X38_CK	X38_Cd	Up	2.78262e-06	0.000279531	0.606935
HORVU.MOREX.r2.6HG0451680	TCONS_00063791	tran	mRNA	X38_CK	X38_Cd	Up	2.78831e-06	0.000279531	20.661
HORVU.MOREX.r2.7HG0535630	TCONS_00082112	tran	mRNA	X38_CK	X38_Cd	Dw	2.78456e-06	0.000279531	-7.75435
HORVU.MOREX.r2.5HG0396750	HORVU.MOREX.r2.5HG0396750.1	tran	mRNA	X38_CK	X38_Cd	Dw	2.80258e-06	0.000280483	-1.20966
HORVU.MOREX.r2.5HG0358490	TCONS_00050396	tran	mRNA	X38_CK	X38_Cd	Up	2.89296e-06	0.000288543	20.6279
HORVU.MOREX.r2.5HG0397300	HORVU.MOREX.r2.5HG0397300.1	tran	mRNA	X38_CK	X38_Cd	Dw	2.8907e-06	0.000288543	-1.22169
HORVU.MOREX.r2.3HG0223820	HORVU.MOREX.r2.3HG0223820.1	tran	mRNA	X38_CK	X38_Cd	Up	2.92491e-06	0.000290741	8.53788
HORVU.MOREX.r2.5HG0423830	HORVU.MOREX.r2.5HG0423830.1	tran	mRNA	X38_CK	X38_Cd	Dw	2.92454e-06	0.000290741	-1.53959
HORVU.MOREX.r2.7HG0597660	HORVU.MOREX.r2.7HG0597660.1	tran	mRNA	X38_CK	X38_Cd	Dw	2.93599e-06	0.000290856	-7.83105
HORVU.MOREX.r2.7HG0616260	HORVU.MOREX.r2.7HG0616260.1	tran	mRNA	X38_CK	X38_Cd	Up	2.9331e-06	0.000290856	2.61624
HORVU.MOREX.r2.5HG0436490	TCONS_00062727	tran	mRNA	X38_CK	X38_Cd	Up	2.9959e-06	0.000296291	8.01765
HORVU.MOREX.r2.1HG0067240	TCONS_00010337	tran	mRNA	X38_CK	X38_Cd	Up	3.06055e-06	0.00030098	7.52338
HORVU.MOREX.r2.5HG0352010	HORVU.MOREX.r2.5HG0352010.1	tran	mRNA	X38_CK	X38_Cd	Up	3.06013e-06	0.00030098	1.9312
HORVU.MOREX.r2.5HG0401200	HORVU.MOREX.r2.5HG0401200.1	tran	mRNA	X38_CK	X38_Cd	Dw	3.06385e-06	0.00030098	-1.73008
HORVU.MOREX.r2.6HG0469000	TCONS_00070641	tran	mRNA	X38_CK	X38_Cd	Up	3.05896e-06	0.00030098	1.1612
HORVU.MOREX.r2.1HG0012630	TCONS_00006459	tran	mRNA	X38_CK	X38_Cd	Dw	3.1305e-06	0.000307014	-0.976445
HORVU.MOREX.r2.4HG0283310	TCONS_00039712	tran	mRNA	X38_CK	X38_Cd	Up	3.13692e-06	0.000307131	7.86704
XLOC_036755	TCONS_00052031	tran	lncRNA	X38_CK	X38_Cd	Dw	3.19545e-06	0.000312339	-1.64315
HORVU.MOREX.r2.7HG0604280	HORVU.MOREX.r2.7HG0604280.1	tran	mRNA	X38_CK	X38_Cd	Up	3.22835e-06	0.00031503	1.46627
HORVU.MOREX.r2.1HG0068230	HORVU.MOREX.r2.1HG0068230.1	tran	mRNA	X38_CK	X38_Cd	Up	3.2775e-06	0.000319295	7.08612
HORVU.MOREX.r2.5HG0383770	TCONS_00059097	tran	mRNA	X38_CK	X38_Cd	Up	3.29272e-06	0.000320246	1.15311
HORVU.MOREX.r2.5HG0353210	TCONS_00056800	tran	mRNA	X38_CK	X38_Cd	Up	3.34005e-06	0.000324312	7.50465
HORVU.MOREX.r2.7HG0599740	TCONS_00086573	tran	mRNA	X38_CK	X38_Cd	Dw	3.40011e-06	0.000329597	-0.686421
HORVU.MOREX.r2.1HG0053570	TCONS_00003822	tran	mRNA	X38_CK	X38_Cd	Up	3.42491e-06	0.000331453	1.37676
HORVU.MOREX.r2.6HG0481080	TCONS_00071440	tran	mRNA	X38_CK	X38_Cd	Dw	3.53787e-06	0.000341822	-0.583734
HORVU.MOREX.r2.7HG0614540	HORVU.MOREX.r2.7HG0614540.1	tran	mRNA	X38_CK	X38_Cd	Dw	3.68868e-06	0.000355806	-4.37543
HORVU.MOREX.r2.5HG0384760	TCONS_00059185	tran	lncRNA	X38_CK	X38_Cd	Dw	3.73024e-06	0.000358782	-8.56983
HORVU.MOREX.r2.UnG0627410	TCONS_00089482	tran	lncRNA	X38_CK	X38_Cd	Dw	3.73177e-06	0.000358782	-1.30748
HORVU.MOREX.r2.2HG0102740	HORVU.MOREX.r2.2HG0102740.1	tran	mRNA	X38_CK	X38_Cd	Up	3.74735e-06	0.00035969	1.57434
HORVU.MOREX.r2.1HG0061720	HORVU.MOREX.r2.1HG0061720.1	tran	mRNA	X38_CK	X38_Cd	Up	3.82825e-06	0.000366583	1.18622
HORVU.MOREX.r2.7HG0567290	HORVU.MOREX.r2.7HG0567290.1	tran	mRNA	X38_CK	X38_Cd	Up	3.83166e-06	0.000366583	0.958366
XLOC_036935	TCONS_00052284	tran	lncRNA	X38_CK	X38_Cd	Dw	3.89711e-06	0.000372237	-1.70971
HORVU.MOREX.r2.3HG0248400	TCONS_00037205	tran	mRNA	X38_CK	X38_Cd	Up	3.92256e-06	0.000374059	1.43124
HORVU.MOREX.r2.3HG0266070	HORVU.MOREX.r2.3HG0266070.1	tran	mRNA	X38_CK	X38_Cd	Up	3.99164e-06	0.000380028	7.13286
HORVU.MOREX.r2.7HG0547140	TCONS_00076014	tran	mRNA	X38_CK	X38_Cd	Dw	4.00414e-06	0.000380601	-0.601221
HORVU.MOREX.r2.5HG0426110	HORVU.MOREX.r2.5HG0426110.1	tran	mRNA	X38_CK	X38_Cd	Dw	4.05044e-06	0.000384379	-0.924082
HORVU.MOREX.r2.2HG0141150	HORVU.MOREX.r2.2HG0141150.1	tran	mRNA	X38_CK	X38_Cd	Dw	4.14004e-06	0.000392247	-1.93738
HORVU.MOREX.r2.6HG0477060	HORVU.MOREX.r2.6HG0477060.1	tran	mRNA	X38_CK	X38_Cd	Dw	4.1719e-06	0.000394628	-1.41715
HORVU.MOREX.r2.7HG0619330	HORVU.MOREX.r2.7HG0619330.1	tran	mRNA	X38_CK	X38_Cd	Up	4.17991e-06	0.000394749	2.15505
HORVU.MOREX.r2.7HG0604310	HORVU.MOREX.r2.7HG0604310.1	tran	mRNA	X38_CK	X38_Cd	Up	4.31005e-06	0.000406385	2.62509
HORVU.MOREX.r2.4HG0289700	HORVU.MOREX.r2.4HG0289700.1	tran	mRNA	X38_CK	X38_Cd	Dw	4.37447e-06	0.000411797	-1.43311
HORVU.MOREX.r2.7HG0579200	TCONS_00078378	tran	lncRNA	X38_CK	X38_Cd	Dw	4.51141e-06	0.000424007	-1.25427
HORVU.MOREX.r2.4HG0326680	HORVU.MOREX.r2.4HG0326680.1	tran	mRNA	X38_CK	X38_Cd	Up	4.52473e-06	0.000424579	2.79508
XLOC_020347	TCONS_00028756	tran	lncRNA	X38_CK	X38_Cd	Dw	4.61065e-06	0.00043195	-6.90934
HORVU.MOREX.r2.2HG0111610	TCONS_00020776	tran	lncRNA	X38_CK	X38_Cd	Dw	4.63021e-06	0.000433091	-2.429
HORVU.MOREX.r2.4HG0326420	TCONS_00042804	tran	mRNA	X38_CK	X38_Cd	Up	4.63875e-06	0.000433199	1.91427
HORVU.MOREX.r2.5HG0390830	TCONS_00059650	tran	mRNA	X38_CK	X38_Cd	Up	4.71645e-06	0.000439754	3.44992
HORVU.MOREX.r2.7HG0549590	TCONS_00076187	tran	mRNA	X38_CK	X38_Cd	Up	4.78321e-06	0.000445271	2.9816
HORVU.MOREX.r2.2HG0161910	HORVU.MOREX.r2.2HG0161910.1	tran	mRNA	X38_CK	X38_Cd	Up	4.81569e-06	0.000447584	0.960948
XLOC_061013	TCONS_00086084	tran	lncRNA	X38_CK	X38_Cd	Up	4.86353e-06	0.000451315	2.92712
HORVU.MOREX.r2.1HG0062190	TCONS_00009987	tran	mRNA	X38_CK	X38_Cd	Up	4.95635e-06	0.000459202	20.1323
XLOC_041755	TCONS_00059107	tran	lncRNA	X38_CK	X38_Cd	Dw	5.02569e-06	0.000464892	-1.04228
HORVU.MOREX.r2.4HG0282540	HORVU.MOREX.r2.4HG0282540.1	tran	mRNA	X38_CK	X38_Cd	Up	5.10683e-06	0.000471654	1.06903
HORVU.MOREX.r2.5HG0355170	TCONS_00056975	tran	mRNA	X38_CK	X38_Cd	Dw	5.17352e-06	0.000477062	-6.21876
HORVU.MOREX.r2.2HG0095010	HORVU.MOREX.r2.2HG0095010.1	tran	mRNA	X38_CK	X38_Cd	Up	5.21699e-06	0.000480316	1.86353
HORVU.MOREX.r2.3HG0227720	HORVU.MOREX.r2.3HG0227720.1	tran	mRNA	X38_CK	X38_Cd	Dw	5.24877e-06	0.000482484	-8.29086
HORVU.MOREX.r2.6HG0481850	TCONS_00066004	tran	mRNA	X38_CK	X38_Cd	Up	5.30176e-06	0.000486592	20.0718
HORVU.MOREX.r2.3HG0200400	HORVU.MOREX.r2.3HG0200400.1	tran	mRNA	X38_CK	X38_Cd	Up	5.366e-06	0.000491719	1.4684
HORVU.MOREX.r2.2HG0084600	TCONS_00018822	tran	mRNA	X38_CK	X38_Cd	Up	5.40107e-06	0.00049416	1.60669
HORVU.MOREX.r2.1HG0042360	TCONS_00003051	tran	mRNA	X38_CK	X38_Cd	Up	5.42662e-06	0.000494185	2.19449
HORVU.MOREX.r2.1HG0059750	TCONS_00004257	tran	mRNA	X38_CK	X38_Cd	Up	5.42613e-06	0.000494185	0.813759
HORVU.MOREX.r2.2HG0129490	HORVU.MOREX.r2.2HG0129490.1	tran	mRNA	X38_CK	X38_Cd	Up	5.41789e-06	0.000494185	0.970575
HORVU.MOREX.r2.1HG0072040	HORVU.MOREX.r2.1HG0072040.1	tran	mRNA	X38_CK	X38_Cd	Up	5.46231e-06	0.000496664	1.11748
HORVU.MOREX.r2.1HG0058760	HORVU.MOREX.r2.1HG0058760.1	tran	mRNA	X38_CK	X38_Cd	Up	5.49608e-06	0.000498961	1.63529
HORVU.MOREX.r2.2HG0081690	HORVU.MOREX.r2.2HG0081690.1	tran	mRNA	X38_CK	X38_Cd	Up	5.52272e-06	0.000500604	0.766757
HORVU.MOREX.r2.4HG0283610	HORVU.MOREX.r2.4HG0283610.1	tran	mRNA	X38_CK	X38_Cd	Up	5.63426e-06	0.000509927	1.37571
HORVU.MOREX.r2.2HG0096540	HORVU.MOREX.r2.2HG0096540.1	tran	mRNA	X38_CK	X38_Cd	Up	5.71127e-06	0.0005161	2.05542
HORVU.MOREX.r2.6HG0463250	TCONS_00064600	tran	mRNA	X38_CK	X38_Cd	Dw	5.83372e-06	0.000526354	-1.13389
HORVU.MOREX.r2.4HG0279610	HORVU.MOREX.r2.4HG0279610.1	tran	mRNA	X38_CK	X38_Cd	Up	5.91125e-06	0.00053253	2.99562
HORVU.MOREX.r2.5HG0409430	TCONS_00060948	tran	mRNA	X38_CK	X38_Cd	Up	5.95352e-06	0.000535516	0.740892
HORVU.MOREX.r2.5HG0430540	HORVU.MOREX.r2.5HG0430540.1	tran	mRNA	X38_CK	X38_Cd	Up	6.0345e-06	0.000541968	2.01345
HORVU.MOREX.r2.3HG0243350	HORVU.MOREX.r2.3HG0243350.1	tran	mRNA	X38_CK	X38_Cd	Up	6.05747e-06	0.0005432	0.664036
HORVU.MOREX.r2.6HG0464420	HORVU.MOREX.r2.6HG0464420.1	tran	mRNA	X38_CK	X38_Cd	Up	6.09186e-06	0.000545449	1.55162
HORVU.MOREX.r2.4HG0330610	HORVU.MOREX.r2.4HG0330610.1	tran	mRNA	X38_CK	X38_Cd	Up	6.14011e-06	0.000548931	0.746839
HORVU.MOREX.r2.3HG0230250	HORVU.MOREX.r2.3HG0230250.1	tran	mRNA	X38_CK	X38_Cd	Up	6.23292e-06	0.000556381	0.898059
HORVU.MOREX.r2.2HG0168960	TCONS_00017530	tran	mRNA	X38_CK	X38_Cd	Up	6.25273e-06	0.0005573	1.14471
HORVU.MOREX.r2.4HG0291120	TCONS_00045493	tran	mRNA	X38_CK	X38_Cd	Dw	6.26234e-06	0.00055731	-6.28881
HORVU.MOREX.r2.3HG0195890	TCONS_00033356	tran	mRNA	X38_CK	X38_Cd	Up	6.35699e-06	0.000564195	1.43592
HORVU.MOREX.r2.5HG0358820	HORVU.MOREX.r2.5HG0358820.1	tran	mRNA	X38_CK	X38_Cd	Up	6.35894e-06	0.000564195	0.869586
HORVU.MOREX.r2.4HG0332500	HORVU.MOREX.r2.4HG0332500.1	tran	mRNA	X38_CK	X38_Cd	Up	6.41331e-06	0.000567302	1.83417
HORVU.MOREX.r2.6HG0500540	TCONS_00067324	tran	mRNA	X38_CK	X38_Cd	Dw	6.40373e-06	0.000567302	-1.61531
HORVU.MOREX.r2.4HG0326410	HORVU.MOREX.r2.4HG0326410.1	tran	mRNA	X38_CK	X38_Cd	Up	6.46895e-06	0.000571363	1.83463
HORVU.MOREX.r2.6HG0469030	TCONS_00070645	tran	mRNA	X38_CK	X38_Cd	Up	6.53968e-06	0.000576741	0.999225
HORVU.MOREX.r2.5HG0363360	TCONS_00057600	tran	mRNA	X38_CK	X38_Cd	Up	6.55514e-06	0.000577236	0.552144
XLOC_014285	TCONS_00020079	tran	lncRNA	X38_CK	X38_Cd	Up	6.56913e-06	0.000577601	2.38351
HORVU.MOREX.r2.1HG0053700	HORVU.MOREX.r2.1HG0053700.1	tran	mRNA	X38_CK	X38_Cd	Up	6.88918e-06	0.000604835	1.52063
HORVU.MOREX.r2.6HG0519290	TCONS_00068597	tran	mRNA	X38_CK	X38_Cd	Dw	6.91179e-06	0.000605913	-1.57668
HORVU.MOREX.r2.4HG0320560	HORVU.MOREX.r2.4HG0320560.1	tran	mRNA	X38_CK	X38_Cd	Up	6.99107e-06	0.000611949	1.42263
HORVU.MOREX.r2.5HG0411910	HORVU.MOREX.r2.5HG0411910.1	tran	mRNA	X38_CK	X38_Cd	Up	7.00798e-06	0.000612514	2.91816
HORVU.MOREX.r2.4HG0319060	HORVU.MOREX.r2.4HG0319060.1	tran	mRNA	X38_CK	X38_Cd	Up	7.04013e-06	0.000613769	1.54964
HORVU.MOREX.r2.5HG0406540	HORVU.MOREX.r2.5HG0406540.1	tran	mRNA	X38_CK	X38_Cd	Dw	7.04327e-06	0.000613769	-1.7174
HORVU.MOREX.r2.2HG0150360	HORVU.MOREX.r2.2HG0150360.1	tran	mRNA	X38_CK	X38_Cd	Up	7.15905e-06	0.000622933	3.96902
HORVU.MOREX.r2.5HG0388560	HORVU.MOREX.r2.5HG0388560.1	tran	mRNA	X38_CK	X38_Cd	Up	7.2914e-06	0.000633509	1.95946
HORVU.MOREX.r2.2HG0096900	HORVU.MOREX.r2.2HG0096900.1	tran	mRNA	X38_CK	X38_Cd	Dw	7.37809e-06	0.000640093	-1.64491
HORVU.MOREX.r2.5HG0357880	HORVU.MOREX.r2.5HG0357880.1	tran	mRNA	X38_CK	X38_Cd	Up	7.41314e-06	0.000642184	1.26196
HORVU.MOREX.r2.4HG0277590	TCONS_00039269	tran	mRNA	X38_CK	X38_Cd	Up	7.57292e-06	0.000655057	0.74235
HORVU.MOREX.r2.2HG0118170	TCONS_00021279	tran	mRNA	X38_CK	X38_Cd	Dw	7.72604e-06	0.000665359	-1.33485
HORVU.MOREX.r2.5HG0363280	HORVU.MOREX.r2.5HG0363280.1	tran	mRNA	X38_CK	X38_Cd	Dw	7.70805e-06	0.000665359	-0.634997
XLOC_017506	TCONS_00024720	tran	lncRNA	X38_CK	X38_Cd	Dw	7.71668e-06	0.000665359	-1.14964
HORVU.MOREX.r2.1HG0004030	TCONS_00005858	tran	mRNA	X38_CK	X38_Cd	Dw	7.76208e-06	0.000667482	-3.82753
XLOC_002044	TCONS_00002843	tran	lncRNA	X38_CK	X38_Cd	Up	7.80185e-06	0.00066992	1.00841
HORVU.MOREX.r2.5HG0387900	HORVU.MOREX.r2.5HG0387900.1	tran	mRNA	X38_CK	X38_Cd	Up	7.97104e-06	0.000683447	1.22654
HORVU.MOREX.r2.3HG0189220	TCONS_00032916	tran	mRNA	X38_CK	X38_Cd	Up	8.11169e-06	0.000694491	3.15986
HORVU.MOREX.r2.5HG0428670	TCONS_00062253	tran	mRNA	X38_CK	X38_Cd	Up	8.33476e-06	0.000712549	1.84237
HORVU.MOREX.r2.7HG0541620	TCONS_00082572	tran	mRNA	X38_CK	X38_Cd	Dw	8.42495e-06	0.000719211	-0.846611
HORVU.MOREX.r2.7HG0558780	HORVU.MOREX.r2.7HG0558780.1	tran	mRNA	X38_CK	X38_Cd	Dw	8.62309e-06	0.000735055	-2.34362
XLOC_012078	TCONS_00017042	tran	lncRNA	X38_CK	X38_Cd	Dw	8.74703e-06	0.000744539	-1.16381
HORVU.MOREX.r2.3HG0264040	TCONS_00031596	tran	mRNA	X38_CK	X38_Cd	Dw	8.94196e-06	0.000760028	-1.00692
HORVU.MOREX.r2.3HG0237100	TCONS_00029727	tran	mRNA	X38_CK	X38_Cd	Up	9.12084e-06	0.000773791	1.86499
HORVU.MOREX.r2.7HG0593060	TCONS_00086077	tran	mRNA	X38_CK	X38_Cd	Up	9.13027e-06	0.000773791	0.751256
HORVU.MOREX.r2.6HG0475730	TCONS_00065544	tran	mRNA	X38_CK	X38_Cd	Up	9.37036e-06	0.000792992	1.0104
HORVU.MOREX.r2.2HG0098350	TCONS_00012520	tran	mRNA	X38_CK	X38_Cd	Up	9.42393e-06	0.000795231	0.703676
HORVU.MOREX.r2.5HG0416430	TCONS_00054310	tran	mRNA	X38_CK	X38_Cd	Dw	9.41064e-06	0.000795231	-0.926758
HORVU.MOREX.r2.6HG0471060	TCONS_00065149	tran	mRNA	X38_CK	X38_Cd	Up	9.48678e-06	0.000798237	1.6913
HORVU.MOREX.r2.7HG0548990	HORVU.MOREX.r2.7HG0548990.1	tran	mRNA	X38_CK	X38_Cd	Up	9.48323e-06	0.000798237	1.08221
XLOC_057436	TCONS_00081115	tran	lncRNA	X38_CK	X38_Cd	Up	9.50401e-06	0.000798541	3.42996
HORVU.MOREX.r2.4HG0313770	HORVU.MOREX.r2.4HG0313770.1	tran	mRNA	X38_CK	X38_Cd	Up	9.94461e-06	0.000834365	0.532541
HORVU.MOREX.r2.4HG0333670	HORVU.MOREX.r2.4HG0333670.1	tran	mRNA	X38_CK	X38_Cd	Up	1.00492e-05	0.000841741	1.39106
XLOC_014115	TCONS_00019838	tran	lncRNA	X38_CK	X38_Cd	Dw	1.00612e-05	0.000841741	-2.56874
HORVU.MOREX.r2.2HG0155830	HORVU.MOREX.r2.2HG0155830.1	tran	mRNA	X38_CK	X38_Cd	Up	1.02282e-05	0.000854489	2.30036
HORVU.MOREX.r2.5HG0351950	TCONS_00056714	tran	mRNA	X38_CK	X38_Cd	Up	1.03459e-05	0.000863097	1.13591
HORVU.MOREX.r2.1HG0038650	HORVU.MOREX.r2.1HG0038650.1	tran	mRNA	X38_CK	X38_Cd	Up	1.04255e-05	0.000868502	1.31159
HORVU.MOREX.r2.7HG0620620	TCONS_00081198	tran	mRNA	X38_CK	X38_Cd	Dw	1.04634e-05	0.000870418	-2.08701
HORVU.MOREX.r2.2HG0150550	TCONS_00023678	tran	mRNA	X38_CK	X38_Cd	Up	1.05006e-05	0.000872281	1.0574
HORVU.MOREX.r2.7HG0585370	TCONS_00078791	tran	mRNA	X38_CK	X38_Cd	Dw	1.068e-05	0.000885925	-0.474259
HORVU.MOREX.r2.4HG0277980	TCONS_00039290	tran	mRNA	X38_CK	X38_Cd	Up	1.12295e-05	0.000928882	1.04961
HORVU.MOREX.r2.7HG0593070	TCONS_00079317	tran	mRNA	X38_CK	X38_Cd	Up	1.12272e-05	0.000928882	2.25468
HORVU.MOREX.r2.1HG0003970	HORVU.MOREX.r2.1HG0003970.1	tran	mRNA	X38_CK	X38_Cd	Dw	1.13073e-05	0.000932683	-2.08775
HORVU.MOREX.r2.1HG0039310	HORVU.MOREX.r2.1HG0039310.1	tran	mRNA	X38_CK	X38_Cd	Up	1.12928e-05	0.000932683	4.95207
HORVU.MOREX.r2.2HG0078850	HORVU.MOREX.r2.2HG0078850.1	tran	mRNA	X38_CK	X38_Cd	Dw	1.13435e-05	0.000932815	-7.56684
HORVU.MOREX.r2.7HG0547450	TCONS_00076034	tran	mRNA	X38_CK	X38_Cd	Up	1.13566e-05	0.000932815	2.22958
HORVU.MOREX.r2.7HG0559070	HORVU.MOREX.r2.7HG0559070.1	tran	mRNA	X38_CK	X38_Cd	Dw	1.13435e-05	0.000932815	-7.56684
HORVU.MOREX.r2.4HG0317050	TCONS_00042105	tran	mRNA	X38_CK	X38_Cd	Up	1.15562e-05	0.000947884	4.54197
HORVU.MOREX.r2.6HG0520780	TCONS_00074184	tran	mRNA	X38_CK	X38_Cd	Up	1.18527e-05	0.000970847	0.647257
HORVU.MOREX.r2.7HG0619420	HORVU.MOREX.r2.7HG0619420.1	tran	mRNA	X38_CK	X38_Cd	Up	1.20783e-05	0.000987948	0.790394
XLOC_061105	TCONS_00086210	tran	lncRNA	X38_CK	X38_Cd	Up	1.2153e-05	0.00099267	1.31764
HORVU.MOREX.r2.2HG0131160	HORVU.MOREX.r2.2HG0131160.1	tran	mRNA	X38_CK	X38_Cd	Up	1.21844e-05	0.0009938	1.50626
HORVU.MOREX.r2.4HG0322370	HORVU.MOREX.r2.4HG0322370.1	tran	mRNA	X38_CK	X38_Cd	Up	1.22007e-05	0.0009938	0.829726
XLOC_011947	TCONS_00016874	tran	lncRNA	X38_CK	X38_Cd	Dw	1.22527e-05	0.000996652	-1.12202
HORVU.MOREX.r2.1HG0075070	HORVU.MOREX.r2.1HG0075070.1	tran	mRNA	X38_CK	X38_Cd	Dw	1.23031e-05	0.00099936	-1.81371
HORVU.MOREX.r2.5HG0402970	HORVU.MOREX.r2.5HG0402970.1	tran	mRNA	X38_CK	X38_Cd	Up	1.2641e-05	0.00102539	4.56899
HORVU.MOREX.r2.1HG0003970	TCONS_00005855	tran	mRNA	X38_CK	X38_Cd	Dw	1.27521e-05	0.00103298	-1.67611
HORVU.MOREX.r2.6HG0514150	TCONS_00068269	tran	lncRNA	X38_CK	X38_Cd	Dw	1.28926e-05	0.00104291	-1.51139
HORVU.MOREX.r2.2HG0120200	TCONS_00021459	tran	mRNA	X38_CK	X38_Cd	Dw	1.30271e-05	0.00105234	-1.47032
HORVU.MOREX.r2.6HG0516450	HORVU.MOREX.r2.6HG0516450.1	tran	mRNA	X38_CK	X38_Cd	Up	1.31519e-05	0.00106096	0.982833
HORVU.MOREX.r2.6HG0461220	HORVU.MOREX.r2.6HG0461220.1	tran	mRNA	X38_CK	X38_Cd	Up	1.34076e-05	0.0010801	2.12506
HORVU.MOREX.r2.2HG0100030	HORVU.MOREX.r2.2HG0100030.1	tran	mRNA	X38_CK	X38_Cd	Up	1.35909e-05	0.00109337	1.49807
HORVU.MOREX.r2.UnG0635190	TCONS_00089113	tran	lncRNA	X38_CK	X38_Cd	Dw	1.38809e-05	0.00111517	-1.009
HORVU.MOREX.r2.2HG0083160	HORVU.MOREX.r2.2HG0083160.1	tran	mRNA	X38_CK	X38_Cd	Dw	1.3953e-05	0.00111943	-1.17208
XLOC_020753	TCONS_00029311	tran	lncRNA	X38_CK	X38_Cd	Dw	1.41641e-05	0.00113481	-1.21263
XLOC_022474	TCONS_00031744	tran	lncRNA	X38_CK	X38_Cd	Up	1.41972e-05	0.00113591	6.82452
HORVU.MOREX.r2.7HG0624070	TCONS_00088314	tran	mRNA	X38_CK	X38_Cd	Dw	1.43704e-05	0.0011482	-1.73029
HORVU.MOREX.r2.4HG0344840	TCONS_00044146	tran	mRNA	X38_CK	X38_Cd	Dw	1.44555e-05	0.00115343	-1.88632
HORVU.MOREX.r2.2HG0166780	HORVU.MOREX.r2.2HG0166780.1	tran	mRNA	X38_CK	X38_Cd	Dw	1.45912e-05	0.00116267	-1.55067
XLOC_029549	TCONS_00041705	tran	lncRNA	X38_CK	X38_Cd	Dw	1.49213e-05	0.00118736	-1.68753
HORVU.MOREX.r2.3HG0251350	HORVU.MOREX.r2.3HG0251350.1	tran	mRNA	X38_CK	X38_Cd	Up	1.50139e-05	0.00119311	2.02034
HORVU.MOREX.r2.5HG0408090	TCONS_00060841	tran	mRNA	X38_CK	X38_Cd	Up	1.52271e-05	0.00120842	1.92418
HORVU.MOREX.r2.3HG0188920	TCONS_00026237	tran	mRNA	X38_CK	X38_Cd	Up	1.5408e-05	0.00122113	2.46295
HORVU.MOREX.r2.2HG0177360	TCONS_00018108	tran	mRNA	X38_CK	X38_Cd	Up	1.54443e-05	0.00122235	4.51727
HORVU.MOREX.r2.1HG0046880	HORVU.MOREX.r2.1HG0046880.1	tran	mRNA	X38_CK	X38_Cd	Dw	1.551e-05	0.00122589	-2.22497
HORVU.MOREX.r2.3HG0226900	HORVU.MOREX.r2.3HG0226900.1	tran	mRNA	X38_CK	X38_Cd	Up	1.55423e-05	0.0012268	0.813094
HORVU.MOREX.r2.5HG0416240	HORVU.MOREX.r2.5HG0416240.1	tran	mRNA	X38_CK	X38_Cd	Up	1.57341e-05	0.00124026	1.33806
HORVU.MOREX.r2.6HG0448090	TCONS_00069160	tran	mRNA	X38_CK	X38_Cd	Dw	1.58691e-05	0.00124922	-3.97381
HORVU.MOREX.r2.3HG0200760	TCONS_00033676	tran	mRNA	X38_CK	X38_Cd	Up	1.61973e-05	0.00127336	0.902613
HORVU.MOREX.r2.4HG0337780	HORVU.MOREX.r2.4HG0337780.1	tran	mRNA	X38_CK	X38_Cd	Up	1.62211e-05	0.00127352	0.809361
HORVU.MOREX.r2.7HG0603690	HORVU.MOREX.r2.7HG0603690.1	tran	mRNA	X38_CK	X38_Cd	Up	1.63479e-05	0.00128176	1.94138
HORVU.MOREX.r2.3HG0249270	HORVU.MOREX.r2.3HG0249270.1	tran	mRNA	X38_CK	X38_Cd	Dw	1.66385e-05	0.0013028	-0.772129
HORVU.MOREX.r2.5HG0423450	HORVU.MOREX.r2.5HG0423450.1	tran	mRNA	X38_CK	X38_Cd	Up	1.69784e-05	0.00132765	1.38857
HORVU.MOREX.r2.6HG0503270	HORVU.MOREX.r2.6HG0503270.1	tran	mRNA	X38_CK	X38_Cd	Up	1.70932e-05	0.00133484	3.25057
XLOC_013628	TCONS_00019157	tran	lncRNA	X38_CK	X38_Cd	Dw	1.7156e-05	0.00133796	-0.920112
HORVU.MOREX.r2.4HG0318970	TCONS_00047606	tran	mRNA	X38_CK	X38_Cd	Up	1.72193e-05	0.00134111	0.810338
HORVU.MOREX.r2.6HG0521730	HORVU.MOREX.r2.6HG0521730.1	tran	mRNA	X38_CK	X38_Cd	Up	1.73654e-05	0.0013507	1.19693
HORVU.MOREX.r2.7HG0554130	HORVU.MOREX.r2.7HG0554130.1	tran	mRNA	X38_CK	X38_Cd	Up	1.74851e-05	0.00135821	1.11801
HORVU.MOREX.r2.4HG0323370	TCONS_00042581	tran	mRNA	X38_CK	X38_Cd	Dw	1.75734e-05	0.00136326	-1.30803
HORVU.MOREX.r2.5HG0447780	HORVU.MOREX.r2.5HG0447780.1	tran	mRNA	X38_CK	X38_Cd	Up	1.79067e-05	0.00138728	0.916568
HORVU.MOREX.r2.2HG0161570	TCONS_00024369	tran	mRNA	X38_CK	X38_Cd	Up	1.80472e-05	0.00139375	0.636853
HORVU.MOREX.r2.5HG0444090	TCONS_00056289	tran	mRNA	X38_CK	X38_Cd	Up	1.80581e-05	0.00139375	0.77538
HORVU.MOREX.r2.7HG0562850	TCONS_00077149	tran	mRNA	X38_CK	X38_Cd	Up	1.80614e-05	0.00139375	3.05922
HORVU.MOREX.r2.7HG0540380	TCONS_00082481	tran	mRNA	X38_CK	X38_Cd	Up	1.81909e-05	0.00140189	0.652476
HORVU.MOREX.r2.1HG0075450	HORVU.MOREX.r2.1HG0075450.1	tran	mRNA	X38_CK	X38_Cd	Up	1.85287e-05	0.00142605	6.61556
HORVU.MOREX.r2.3HG0262900	TCONS_00031519	tran	lncRNA	X38_CK	X38_Cd	Dw	1.85687e-05	0.00142726	-0.916794
XLOC_042767	TCONS_00060553	tran	lncRNA	X38_CK	X38_Cd	Dw	1.89508e-05	0.00145473	-7.4815
HORVU.MOREX.r2.7HG0559930	TCONS_00076925	tran	mRNA	X38_CK	X38_Cd	Dw	1.89874e-05	0.00145562	-0.814897
HORVU.MOREX.r2.4HG0332740	TCONS_00043280	tran	mRNA	X38_CK	X38_Cd	Up	1.93641e-05	0.00148256	1.0389
HORVU.MOREX.r2.7HG0540440	HORVU.MOREX.r2.7HG0540440.1	tran	mRNA	X38_CK	X38_Cd	Up	1.93962e-05	0.00148309	0.845392
HORVU.MOREX.r2.7HG0539330	TCONS_00082370	tran	mRNA	X38_CK	X38_Cd	Up	1.96256e-05	0.00149867	1.49752
HORVU.MOREX.r2.5HG0355760	HORVU.MOREX.r2.5HG0355760.1	tran	mRNA	X38_CK	X38_Cd	Dw	2.00103e-05	0.00152606	-1.26909
HORVU.MOREX.r2.6HG0459020	HORVU.MOREX.r2.6HG0459020.1	tran	mRNA	X38_CK	X38_Cd	Up	2.01277e-05	0.00153302	1.9006
HORVU.MOREX.r2.5HG0360170	TCONS_00057311	tran	mRNA	X38_CK	X38_Cd	Up	2.01661e-05	0.00153396	0.753842
HORVU.MOREX.r2.7HG0598610	HORVU.MOREX.r2.7HG0598610.1	tran	mRNA	X38_CK	X38_Cd	Dw	2.03859e-05	0.00154867	-2.45476
HORVU.MOREX.r2.1HG0077230	TCONS_00011032	tran	mRNA	X38_CK	X38_Cd	Up	2.08127e-05	0.00157904	0.702934
HORVU.MOREX.r2.7HG0551030	HORVU.MOREX.r2.7HG0551030.1	tran	mRNA	X38_CK	X38_Cd	Up	2.11e-05	0.00159878	6.93183
HORVU.MOREX.r2.4HG0323370	TCONS_00042582	tran	mRNA	X38_CK	X38_Cd	Dw	2.16051e-05	0.00163473	-1.72095
HORVU.MOREX.r2.4HG0339830	TCONS_00049017	tran	mRNA	X38_CK	X38_Cd	Up	2.1654e-05	0.00163473	0.737033
HORVU.MOREX.r2.5HG0404180	TCONS_00053499	tran	mRNA	X38_CK	X38_Cd	Up	2.16581e-05	0.00163473	0.757253
HORVU.MOREX.r2.7HG0531540	HORVU.MOREX.r2.7HG0531540.1	tran	mRNA	X38_CK	X38_Cd	Dw	2.18802e-05	0.00164936	-1.66796
HORVU.MOREX.r2.2HG0150700	TCONS_00016238	tran	mRNA	X38_CK	X38_Cd	Dw	2.20663e-05	0.00166126	-1.81211
HORVU.MOREX.r2.7HG0590350	HORVU.MOREX.r2.7HG0590350.1	tran	mRNA	X38_CK	X38_Cd	Up	2.24302e-05	0.00168649	1.72515
HORVU.MOREX.r2.3HG0235870	TCONS_00029638	tran	mRNA	X38_CK	X38_Cd	Up	2.27095e-05	0.0017053	1.51069
HORVU.MOREX.r2.2HG0123610	TCONS_00021741	tran	mRNA	X38_CK	X38_Cd	Dw	2.29283e-05	0.00171953	-1.28926
HORVU.MOREX.r2.7HG0624100	HORVU.MOREX.r2.7HG0624100.1	tran	mRNA	X38_CK	X38_Cd	Dw	2.30658e-05	0.00172763	-1.38211
HORVU.MOREX.r2.2HG0116070	HORVU.MOREX.r2.2HG0116070.1	tran	mRNA	X38_CK	X38_Cd	Up	2.31543e-05	0.00172984	2.4475
HORVU.MOREX.r2.7HG0594080	HORVU.MOREX.r2.7HG0594080.1	tran	mRNA	X38_CK	X38_Cd	Up	2.31534e-05	0.00172984	0.582484
HORVU.MOREX.r2.7HG0606560	TCONS_00087068	tran	mRNA	X38_CK	X38_Cd	Dw	2.37004e-05	0.00176839	-2.69635
HORVU.MOREX.r2.3HG0184170	HORVU.MOREX.r2.3HG0184170.1	tran	mRNA	X38_CK	X38_Cd	Dw	2.38763e-05	0.00177925	-0.625821
XLOC_017277	TCONS_00024413	tran	lncRNA	X38_CK	X38_Cd	Dw	2.41367e-05	0.00179637	-1.08491
HORVU.MOREX.r2.1HG0045600	TCONS_00003276	tran	mRNA	X38_CK	X38_Cd	Up	2.43134e-05	0.00180335	1.77201
HORVU.MOREX.r2.3HG0200770	HORVU.MOREX.r2.3HG0200770.1	tran	mRNA	X38_CK	X38_Cd	Dw	2.43227e-05	0.00180335	-7.43578
HORVU.MOREX.r2.3HG0213770	TCONS_00034670	tran	lncRNA	X38_CK	X38_Cd	Up	2.42856e-05	0.00180335	8.67042
HORVU.MOREX.r2.7HG0571580	HORVU.MOREX.r2.7HG0571580.1	tran	mRNA	X38_CK	X38_Cd	Up	2.4356e-05	0.00180354	7.87302
HORVU.MOREX.r2.2HG0102760	TCONS_00020159	tran	mRNA	X38_CK	X38_Cd	Up	2.46283e-05	0.00182141	7.19698
HORVU.MOREX.r2.2HG0106200	HORVU.MOREX.r2.2HG0106200.1	tran	mRNA	X38_CK	X38_Cd	Up	2.47105e-05	0.00182289	0.633667
HORVU.MOREX.r2.6HG0501260	HORVU.MOREX.r2.6HG0501260.1	tran	mRNA	X38_CK	X38_Cd	Up	2.46873e-05	0.00182289	2.93637
HORVU.MOREX.r2.3HG0184680	TCONS_00025963	tran	mRNA	X38_CK	X38_Cd	Up	2.50661e-05	0.0018468	0.764702
HORVU.MOREX.r2.5HG0445570	TCONS_00063333	tran	mRNA	X38_CK	X38_Cd	Up	2.53675e-05	0.00186666	1.09072
HORVU.MOREX.r2.5HG0412380	HORVU.MOREX.r2.5HG0412380.1	tran	mRNA	X38_CK	X38_Cd	Up	2.55074e-05	0.0018746	0.910246
HORVU.MOREX.r2.3HG0231980	HORVU.MOREX.r2.3HG0231980.1	tran	mRNA	X38_CK	X38_Cd	Up	2.56225e-05	0.00188071	1.81813
HORVU.MOREX.r2.2HG0140600	HORVU.MOREX.r2.2HG0140600.1	tran	mRNA	X38_CK	X38_Cd	Dw	2.57702e-05	0.00188918	-1.29969
HORVU.MOREX.r2.2HG0148870	TCONS_00023554	tran	mRNA	X38_CK	X38_Cd	Up	2.58531e-05	0.00189289	1.75185
HORVU.MOREX.r2.5HG0399140	TCONS_00060250	tran	mRNA	X38_CK	X38_Cd	Up	2.59471e-05	0.0018974	1.58623
HORVU.MOREX.r2.7HG0586110	TCONS_00078837	tran	mRNA	X38_CK	X38_Cd	Dw	2.6052e-05	0.0019027	-1.12682
HORVU.MOREX.r2.2HG0147240	TCONS_00023413	tran	mRNA	X38_CK	X38_Cd	Up	2.63905e-05	0.00192373	5.14736
HORVU.MOREX.r2.4HG0314620	TCONS_00041938	tran	mRNA	X38_CK	X38_Cd	Up	2.64054e-05	0.00192373	1.0206
HORVU.MOREX.r2.3HG0186560	HORVU.MOREX.r2.3HG0186560.1	tran	mRNA	X38_CK	X38_Cd	Up	2.65338e-05	0.00192828	0.720566
HORVU.MOREX.r2.4HG0337890	TCONS_00043679	tran	mRNA	X38_CK	X38_Cd	Dw	2.65234e-05	0.00192828	-2.25551
HORVU.MOREX.r2.5HG0355150	TCONS_00056971	tran	lncRNA	X38_CK	X38_Cd	Dw	2.67925e-05	0.00194468	-4.69812
HORVU.MOREX.r2.3HG0271660	HORVU.MOREX.r2.3HG0271660.1	tran	mRNA	X38_CK	X38_Cd	Dw	2.73715e-05	0.00198424	-1.76896
HORVU.MOREX.r2.2HG0178980	HORVU.MOREX.r2.2HG0178980.1	tran	mRNA	X38_CK	X38_Cd	Dw	2.76021e-05	0.0019985	-1.10618
HORVU.MOREX.r2.2HG0159610	TCONS_00016889	tran	mRNA	X38_CK	X38_Cd	Up	2.80466e-05	0.00202818	0.45903
HORVU.MOREX.r2.7HG0531060	TCONS_00074939	tran	mRNA	X38_CK	X38_Cd	Dw	2.80941e-05	0.0020291	-8.51578
HORVU.MOREX.r2.7HG0624080	TCONS_00088315	tran	lncRNA	X38_CK	X38_Cd	Dw	2.83728e-05	0.00204671	-1.77801
HORVU.MOREX.r2.2HG0147730	HORVU.MOREX.r2.2HG0147730.1	tran	mRNA	X38_CK	X38_Cd	Dw	2.85519e-05	0.0020525	-1.36475
HORVU.MOREX.r2.6HG0523850	TCONS_00074407	tran	mRNA	X38_CK	X38_Cd	Up	2.85486e-05	0.0020525	0.973127
HORVU.MOREX.r2.7HG0588870	HORVU.MOREX.r2.7HG0588870.1	tran	mRNA	X38_CK	X38_Cd	Dw	2.8558e-05	0.0020525	-1.06882
HORVU.MOREX.r2.1HG0001060	TCONS_00005624	tran	lncRNA	X38_CK	X38_Cd	Dw	2.86027e-05	0.0020532	-4.23451
HORVU.MOREX.r2.3HG0253580	TCONS_00030845	tran	mRNA	X38_CK	X38_Cd	Up	2.86933e-05	0.00205718	2.26404
HORVU.MOREX.r2.7HG0612980	TCONS_00087548	tran	mRNA	X38_CK	X38_Cd	Up	2.89129e-05	0.0020704	0.762566
HORVU.MOREX.r2.5HG0414620	HORVU.MOREX.r2.5HG0414620.1	tran	mRNA	X38_CK	X38_Cd	Up	2.9203e-05	0.00208862	0.875021
XLOC_030743	TCONS_00043454	tran	lncRNA	X38_CK	X38_Cd	Dw	2.9391e-05	0.00209951	-1.99721
HORVU.MOREX.r2.5HG0390010	TCONS_00059586	tran	mRNA	X38_CK	X38_Cd	Up	2.96163e-05	0.00211302	8.24097
HORVU.MOREX.r2.3HG0234290	HORVU.MOREX.r2.3HG0234290.1	tran	mRNA	X38_CK	X38_Cd	Up	2.96814e-05	0.0021151	1.09606
HORVU.MOREX.r2.6HG0511010	HORVU.MOREX.r2.6HG0511010.1	tran	mRNA	X38_CK	X38_Cd	Up	2.99329e-05	0.00212929	1.55282
HORVU.MOREX.r2.7HG0531560	TCONS_00081802	tran	mRNA	X38_CK	X38_Cd	Up	2.99532e-05	0.00212929	0.825038
HORVU.MOREX.r2.3HG0250850	TCONS_00037395	tran	mRNA	X38_CK	X38_Cd	Dw	3.00272e-05	0.00213197	-1.10662
HORVU.MOREX.r2.3HG0188990	HORVU.MOREX.r2.3HG0188990.1	tran	mRNA	X38_CK	X38_Cd	Up	3.00645e-05	0.00213204	0.698157
HORVU.MOREX.r2.2HG0180280	TCONS_00025627	tran	mRNA	X38_CK	X38_Cd	Dw	3.02534e-05	0.00214284	-1.00541
HORVU.MOREX.r2.6HG0502080	HORVU.MOREX.r2.6HG0502080.1	tran	mRNA	X38_CK	X38_Cd	Up	3.08811e-05	0.00218466	0.764793
HORVU.MOREX.r2.2HG0104740	TCONS_00020332	tran	mRNA	X38_CK	X38_Cd	Dw	3.09552e-05	0.00218514	-2.22579
HORVU.MOREX.r2.3HG0240100	HORVU.MOREX.r2.3HG0240100.1	tran	mRNA	X38_CK	X38_Cd	Up	3.09624e-05	0.00218514	0.688838
HORVU.MOREX.r2.6HG0465340	HORVU.MOREX.r2.6HG0465340.1	tran	mRNA	X38_CK	X38_Cd	Up	3.1071e-05	0.00219017	2.51624
HORVU.MOREX.r2.2HG0116760	TCONS_00013766	tran	lncRNA	X38_CK	X38_Cd	Up	3.13922e-05	0.00221015	0.963451
HORVU.MOREX.r2.1HG0039000	HORVU.MOREX.r2.1HG0039000.1	tran	mRNA	X38_CK	X38_Cd	Up	3.14668e-05	0.00221275	0.561976
HORVU.MOREX.r2.7HG0619460	TCONS_00081107	tran	mRNA	X38_CK	X38_Cd	Up	3.15342e-05	0.00221483	0.736034
HORVU.MOREX.r2.7HG0588240	HORVU.MOREX.r2.7HG0588240.1	tran	mRNA	X38_CK	X38_Cd	Dw	3.17191e-05	0.00222516	-2.4705
HORVU.MOREX.r2.3HG0195120	HORVU.MOREX.r2.3HG0195120.1	tran	mRNA	X38_CK	X38_Cd	Dw	3.17597e-05	0.00222534	-1.17125
HORVU.MOREX.r2.4HG0327680	HORVU.MOREX.r2.4HG0327680.1	tran	mRNA	X38_CK	X38_Cd	Up	3.21462e-05	0.00224706	7.1078
HORVU.MOREX.r2.5HG0435040	TCONS_00055655	tran	mRNA	X38_CK	X38_Cd	Up	3.21463e-05	0.00224706	1.74304
HORVU.MOREX.r2.2HG0153350	HORVU.MOREX.r2.2HG0153350.1	tran	mRNA	X38_CK	X38_Cd	Up	3.25118e-05	0.00226991	1.6226
HORVU.MOREX.r2.3HG0222390	TCONS_00035356	tran	mRNA	X38_CK	X38_Cd	Up	3.27913e-05	0.0022867	0.643839
HORVU.MOREX.r2.1HG0014880	TCONS_00001064	tran	mRNA	X38_CK	X38_Cd	Up	3.30469e-05	0.0023004	1.60395
XLOC_030068	TCONS_00042497	tran	lncRNA	X38_CK	X38_Cd	Dw	3.30662e-05	0.0023004	-1.37135
HORVU.MOREX.r2.7HG0573770	TCONS_00077984	tran	mRNA	X38_CK	X38_Cd	Up	3.31455e-05	0.00230318	1.20419
HORVU.MOREX.r2.7HG0591250	HORVU.MOREX.r2.7HG0591250.1	tran	mRNA	X38_CK	X38_Cd	Dw	3.35233e-05	0.00232668	-1.89384
HORVU.MOREX.r2.3HG0205650	TCONS_00027455	tran	mRNA	X38_CK	X38_Cd	Up	3.38293e-05	0.00234351	0.681547
HORVU.MOREX.r2.5HG0350270	HORVU.MOREX.r2.5HG0350270.1	tran	mRNA	X38_CK	X38_Cd	Dw	3.38458e-05	0.00234351	-4.70794
HORVU.MOREX.r2.2HG0126560	TCONS_00014531	tran	mRNA	X38_CK	X38_Cd	Dw	3.40235e-05	0.00235026	-6.20762
HORVU.MOREX.r2.5HG0436080	HORVU.MOREX.r2.5HG0436080.1	tran	mRNA	X38_CK	X38_Cd	Up	3.39961e-05	0.00235026	0.550648
HORVU.MOREX.r2.1HG0069860	TCONS_00010504	tran	lncRNA	X38_CK	X38_Cd	Dw	3.43701e-05	0.00237142	-7.45397
HORVU.MOREX.r2.3HG0200100	HORVU.MOREX.r2.3HG0200100.1	tran	mRNA	X38_CK	X38_Cd	Up	3.46445e-05	0.00238754	2.16578
HORVU.MOREX.r2.2HG0139300	TCONS_00015488	tran	mRNA	X38_CK	X38_Cd	Up	3.47709e-05	0.00239344	0.934123
HORVU.MOREX.r2.7HG0531000	TCONS_00074935	tran	mRNA	X38_CK	X38_Cd	Up	3.50581e-05	0.00241038	1.16251
HORVU.MOREX.r2.5HG0419200	TCONS_00054503	tran	mRNA	X38_CK	X38_Cd	Up	3.5198e-05	0.00241717	0.720254
HORVU.MOREX.r2.2HG0100050	HORVU.MOREX.r2.2HG0100050.1	tran	mRNA	X38_CK	X38_Cd	Up	3.55023e-05	0.00243521	3.20878
HORVU.MOREX.r2.2HG0168130	TCONS_00024789	tran	mRNA	X38_CK	X38_Cd	Up	3.56234e-05	0.00244066	7.14941
HORVU.MOREX.r2.1HG0058920	HORVU.MOREX.r2.1HG0058920.1	tran	mRNA	X38_CK	X38_Cd	Dw	3.57573e-05	0.00244698	-7.80738
HORVU.MOREX.r2.7HG0611320	TCONS_00080597	tran	mRNA	X38_CK	X38_Cd	Up	3.58921e-05	0.00245334	9.23291
HORVU.MOREX.r2.5HG0390470	HORVU.MOREX.r2.5HG0390470.1	tran	mRNA	X38_CK	X38_Cd	Up	3.6038e-05	0.00246044	1.2327
HORVU.MOREX.r2.1HG0033880	TCONS_00002454	tran	mRNA	X38_CK	X38_Cd	Dw	3.61214e-05	0.00246327	-6.03518
HORVU.MOREX.r2.2HG0100030	TCONS_00019948	tran	mRNA	X38_CK	X38_Cd	Up	3.62786e-05	0.00246825	1.92214
HORVU.MOREX.r2.3HG0262010	TCONS_00038185	tran	mRNA	X38_CK	X38_Cd	Up	3.62425e-05	0.00246825	0.734511
HORVU.MOREX.r2.3HG0211480	TCONS_00027869	tran	lncRNA	X38_CK	X38_Cd	Up	3.63725e-05	0.00247177	5.94545
HORVU.MOREX.r2.4HG0284900	HORVU.MOREX.r2.4HG0284900.1	tran	mRNA	X38_CK	X38_Cd	Up	3.64385e-05	0.00247339	2.79341
HORVU.MOREX.r2.2HG0148870	TCONS_00023553	tran	mRNA	X38_CK	X38_Cd	Up	3.68181e-05	0.00249051	2.70693
HORVU.MOREX.r2.3HG0264540	TCONS_00038324	tran	mRNA	X38_CK	X38_Cd	Up	3.68044e-05	0.00249051	0.704135
HORVU.MOREX.r2.7HG0592280	TCONS_00086013	tran	mRNA	X38_CK	X38_Cd	Up	3.68176e-05	0.00249051	1.8012
HORVU.MOREX.r2.2HG0105590	HORVU.MOREX.r2.2HG0105590.1	tran	mRNA	X38_CK	X38_Cd	Up	3.74096e-05	0.0025276	1.75223
HORVU.MOREX.r2.7HG0549240	HORVU.MOREX.r2.7HG0549240.1	tran	mRNA	X38_CK	X38_Cd	Up	3.7485e-05	0.00252978	3.12629
HORVU.MOREX.r2.7HG0579980	HORVU.MOREX.r2.7HG0579980.1	tran	mRNA	X38_CK	X38_Cd	Up	3.75642e-05	0.00253221	1.41308
HORVU.MOREX.r2.4HG0323030	TCONS_00042565	tran	mRNA	X38_CK	X38_Cd	Dw	3.79785e-05	0.00255589	-0.788712
HORVU.MOREX.r2.7HG0601740	HORVU.MOREX.r2.7HG0601740.1	tran	mRNA	X38_CK	X38_Cd	Up	3.80025e-05	0.00255589	1.5415
HORVU.MOREX.r2.1HG0048940	TCONS_00009084	tran	lncRNA	X38_CK	X38_Cd	Dw	3.82649e-05	0.00257059	-1.04511
HORVU.MOREX.r2.2HG0152390	TCONS_00016354	tran	mRNA	X38_CK	X38_Cd	Up	3.86037e-05	0.00259038	1.56964
HORVU.MOREX.r2.6HG0473710	HORVU.MOREX.r2.6HG0473710.1	tran	mRNA	X38_CK	X38_Cd	Dw	3.86685e-05	0.00259176	-0.802816
HORVU.MOREX.r2.2HG0165250	HORVU.MOREX.r2.2HG0165250.1	tran	mRNA	X38_CK	X38_Cd	Up	3.92055e-05	0.00262475	1.65367
HORVU.MOREX.r2.3HG0247630	TCONS_00037161	tran	mRNA	X38_CK	X38_Cd	Dw	3.92642e-05	0.00262569	-1.44475
HORVU.MOREX.r2.2HG0180660	HORVU.MOREX.r2.2HG0180660.1	tran	mRNA	X38_CK	X38_Cd	Up	3.95489e-05	0.0026393	2.10279
XLOC_016351	TCONS_00023138	tran	lncRNA	X38_CK	X38_Cd	Dw	3.95577e-05	0.0026393	-6.62521
HORVU.MOREX.r2.1HG0041330	HORVU.MOREX.r2.1HG0041330.1	tran	mRNA	X38_CK	X38_Cd	Up	3.98617e-05	0.00264453	1.13597
HORVU.MOREX.r2.1HG0058230	TCONS_00009702	tran	mRNA	X38_CK	X38_Cd	Up	3.98228e-05	0.00264453	7.2461
HORVU.MOREX.r2.3HG0246630	TCONS_00037083	tran	mRNA	X38_CK	X38_Cd	Up	3.97513e-05	0.00264453	0.832919
HORVU.MOREX.r2.4HG0328290	HORVU.MOREX.r2.4HG0328290.1	tran	mRNA	X38_CK	X38_Cd	Up	3.98144e-05	0.00264453	1.22037
HORVU.MOREX.r2.5HG0389780	HORVU.MOREX.r2.5HG0389780.1	tran	mRNA	X38_CK	X38_Cd	Dw	3.98049e-05	0.00264453	-3.61061
HORVU.MOREX.r2.1HG0007130	TCONS_00000526	tran	lncRNA	X38_CK	X38_Cd	Dw	4.02091e-05	0.00266457	-1.19397
XLOC_026306	TCONS_00037198	tran	lncRNA	X38_CK	X38_Cd	Dw	4.0466e-05	0.00267857	-1.59108
HORVU.MOREX.r2.7HG0572090	TCONS_00077866	tran	lncRNA	X38_CK	X38_Cd	Dw	4.06344e-05	0.00268668	-1.68382
HORVU.MOREX.r2.3HG0194500	TCONS_00026672	tran	mRNA	X38_CK	X38_Cd	Dw	4.08581e-05	0.00269539	-1.68007
HORVU.MOREX.r2.7HG0612270	TCONS_00080646	tran	mRNA	X38_CK	X38_Cd	Up	4.08411e-05	0.00269539	0.816383
HORVU.MOREX.r2.7HG0555460	HORVU.MOREX.r2.7HG0555460.1	tran	mRNA	X38_CK	X38_Cd	Up	4.0987e-05	0.00270086	2.42263
HORVU.MOREX.r2.5HG0417630	HORVU.MOREX.r2.5HG0417630.1	tran	mRNA	X38_CK	X38_Cd	Dw	4.15953e-05	0.00273787	-0.702912
HORVU.MOREX.r2.5HG0427320	HORVU.MOREX.r2.5HG0427320.1	tran	mRNA	X38_CK	X38_Cd	Up	4.20809e-05	0.00275951	2.07208
HORVU.MOREX.r2.7HG0592850	HORVU.MOREX.r2.7HG0592850.1	tran	mRNA	X38_CK	X38_Cd	Dw	4.21123e-05	0.00275951	-1.93042
HORVU.MOREX.r2.7HG0622940	TCONS_00081364	tran	mRNA	X38_CK	X38_Cd	Up	4.20668e-05	0.00275951	7.37432
XLOC_033910	TCONS_00047999	tran	lncRNA	X38_CK	X38_Cd	Dw	4.20319e-05	0.00275951	-2.39031
HORVU.MOREX.r2.5HG0355150	TCONS_00056959	tran	lncRNA	X38_CK	X38_Cd	Dw	4.22777e-05	0.00276726	-3.29862
HORVU.MOREX.r2.3HG0198100	TCONS_00033504	tran	mRNA	X38_CK	X38_Cd	Dw	4.27133e-05	0.00279265	-3.28532
HORVU.MOREX.r2.7HG0619360	TCONS_00081104	tran	mRNA	X38_CK	X38_Cd	Dw	4.31962e-05	0.00282108	-1.31267
HORVU.MOREX.r2.3HG0239460	TCONS_00029899	tran	mRNA	X38_CK	X38_Cd	Dw	4.34188e-05	0.00283246	-1.20438
HORVU.MOREX.r2.5HG0364820	TCONS_00050826	tran	mRNA	X38_CK	X38_Cd	Up	4.37919e-05	0.00285362	0.66604
HORVU.MOREX.r2.7HG0553050	HORVU.MOREX.r2.7HG0553050.1	tran	mRNA	X38_CK	X38_Cd	Up	4.42911e-05	0.00287975	1.12495
HORVU.MOREX.r2.7HG0592010	HORVU.MOREX.r2.7HG0592010.1	tran	mRNA	X38_CK	X38_Cd	Up	4.42887e-05	0.00287975	1.54994
HORVU.MOREX.r2.7HG0555000	HORVU.MOREX.r2.7HG0555000.1	tran	mRNA	X38_CK	X38_Cd	Up	4.43927e-05	0.00288317	1.01448
HORVU.MOREX.r2.7HG0557760	HORVU.MOREX.r2.7HG0557760.1	tran	mRNA	X38_CK	X38_Cd	Up	4.47395e-05	0.00290248	0.716479
HORVU.MOREX.r2.3HG0226820	HORVU.MOREX.r2.3HG0226820.1	tran	mRNA	X38_CK	X38_Cd	Up	4.51671e-05	0.00292698	0.972256
XLOC_040304	TCONS_00056940	tran	lncRNA	X38_CK	X38_Cd	Dw	4.53958e-05	0.00293531	-4.4632
XLOC_055772	TCONS_00078863	tran	lncRNA	X38_CK	X38_Cd	Dw	4.53772e-05	0.00293531	-1.2237
HORVU.MOREX.r2.3HG0226500	HORVU.MOREX.r2.3HG0226500.1	tran	mRNA	X38_CK	X38_Cd	Up	4.58532e-05	0.00296162	0.808322
HORVU.MOREX.r2.2HG0171570	HORVU.MOREX.r2.2HG0171570.1	tran	mRNA	X38_CK	X38_Cd	Up	4.61066e-05	0.00297471	1.17401
HORVU.MOREX.r2.2HG0146740	TCONS_00023379	tran	mRNA	X38_CK	X38_Cd	Up	4.6344e-05	0.00298675	1.33684
HORVU.MOREX.r2.2HG0114080	HORVU.MOREX.r2.2HG0114080.1	tran	mRNA	X38_CK	X38_Cd	Up	4.67619e-05	0.00300377	1.61695
HORVU.MOREX.r2.5HG0429060	HORVU.MOREX.r2.5HG0429060.1	tran	mRNA	X38_CK	X38_Cd	Dw	4.66731e-05	0.00300377	-1.56029
HORVU.MOREX.r2.7HG0555030	HORVU.MOREX.r2.7HG0555030.1	tran	mRNA	X38_CK	X38_Cd	Up	4.67289e-05	0.00300377	2.00339
HORVU.MOREX.r2.5HG0399400	TCONS_00053144	tran	mRNA	X38_CK	X38_Cd	Up	4.68588e-05	0.00300586	7.88434
HORVU.MOREX.r2.7HG0535030	TCONS_00075209	tran	lncRNA	X38_CK	X38_Cd	Up	4.68969e-05	0.00300586	1.26857
HORVU.MOREX.r2.6HG0461730	TCONS_00064489	tran	mRNA	X38_CK	X38_Cd	Up	4.71117e-05	0.00301633	0.577788
HORVU.MOREX.r2.4HG0327350	TCONS_00042878	tran	mRNA	X38_CK	X38_Cd	Up	4.72609e-05	0.00302259	0.715191
HORVU.MOREX.r2.4HG0304150	TCONS_00041171	tran	lncRNA	X38_CK	X38_Cd	Dw	4.78102e-05	0.00305131	-1.58645
HORVU.MOREX.r2.7HG0607660	TCONS_00087143	tran	mRNA	X38_CK	X38_Cd	Dw	4.78141e-05	0.00305131	-1.45377
HORVU.MOREX.r2.4HG0288760	HORVU.MOREX.r2.4HG0288760.1	tran	mRNA	X38_CK	X38_Cd	Dw	4.80318e-05	0.00306187	-1.18818
HORVU.MOREX.r2.3HG0215670	HORVU.MOREX.r2.3HG0215670.1	tran	mRNA	X38_CK	X38_Cd	Dw	4.83265e-05	0.00307064	-1.40675
HORVU.MOREX.r2.4HG0333630	TCONS_00043331	tran	mRNA	X38_CK	X38_Cd	Up	4.82695e-05	0.00307064	1.10116
XLOC_053055	TCONS_00075064	tran	lncRNA	X38_CK	X38_Cd	Up	4.82848e-05	0.00307064	7.01469
HORVU.MOREX.r2.1HG0071220	HORVU.MOREX.r2.1HG0071220.1	tran	mRNA	X38_CK	X38_Cd	Up	4.91586e-05	0.00312014	1.14551
HORVU.MOREX.r2.2HG0166450	TCONS_00017351	tran	mRNA	X38_CK	X38_Cd	Dw	4.93963e-05	0.00313183	-0.755592
HORVU.MOREX.r2.UnG0630650	HORVU.MOREX.r2.UnG0630650.1	tran	mRNA	X38_CK	X38_Cd	Up	4.95009e-05	0.00313508	6.44173
HORVU.MOREX.r2.2HG0169130	TCONS_00024857	tran	mRNA	X38_CK	X38_Cd	Up	4.97738e-05	0.00314896	0.458317
HORVU.MOREX.r2.5HG0428390	TCONS_00055169	tran	lncRNA	X38_CK	X38_Cd	Up	5.02579e-05	0.00317616	1.28323
HORVU.MOREX.r2.7HG0547600	HORVU.MOREX.r2.7HG0547600.1	tran	mRNA	X38_CK	X38_Cd	Dw	5.07575e-05	0.00320428	-1.53299
HORVU.MOREX.r2.5HG0368600	HORVU.MOREX.r2.5HG0368600.1	tran	mRNA	X38_CK	X38_Cd	Up	5.11292e-05	0.00322427	2.70717
XLOC_054215	TCONS_00076656	tran	lncRNA	X38_CK	X38_Cd	Dw	5.14624e-05	0.0032418	-2.48843
HORVU.MOREX.r2.3HG0222940	TCONS_00028701	tran	mRNA	X38_CK	X38_Cd	Up	5.15702e-05	0.00324246	1.46869
HORVU.MOREX.r2.7HG0620410	TCONS_00081182	tran	mRNA	X38_CK	X38_Cd	Dw	5.15834e-05	0.00324246	-2.4735
HORVU.MOREX.r2.5HG0444750	TCONS_00056339	tran	mRNA	X38_CK	X38_Cd	Dw	5.16702e-05	0.00324443	-1.91746
HORVU.MOREX.r2.2HG0092290	TCONS_00012160	tran	mRNA	X38_CK	X38_Cd	Up	5.22674e-05	0.00327842	0.817891
HORVU.MOREX.r2.4HG0282010	HORVU.MOREX.r2.4HG0282010.1	tran	mRNA	X38_CK	X38_Cd	Up	5.24587e-05	0.00328691	1.23872
HORVU.MOREX.r2.7HG0604220	HORVU.MOREX.r2.7HG0604220.1	tran	mRNA	X38_CK	X38_Cd	Up	5.25163e-05	0.00328701	0.857294
HORVU.MOREX.r2.1HG0003950	HORVU.MOREX.r2.1HG0003950.1	tran	mRNA	X38_CK	X38_Cd	Dw	5.26447e-05	0.00329153	-1.33563
HORVU.MOREX.r2.7HG0607370	HORVU.MOREX.r2.7HG0607370.1	tran	mRNA	X38_CK	X38_Cd	Up	5.33223e-05	0.00333035	0.985907
HORVU.MOREX.r2.7HG0590350	TCONS_00079127	tran	mRNA	X38_CK	X38_Cd	Up	5.3428e-05	0.0033334	1.70046
HORVU.MOREX.r2.6HG0523870	HORVU.MOREX.r2.6HG0523870.1	tran	mRNA	X38_CK	X38_Cd	Up	5.37481e-05	0.0033498	0.829921
HORVU.MOREX.r2.3HG0266050	TCONS_00031745	tran	mRNA	X38_CK	X38_Cd	Up	5.39856e-05	0.00336103	1.48652
HORVU.MOREX.r2.3HG0245310	TCONS_00030252	tran	mRNA	X38_CK	X38_Cd	Up	5.51103e-05	0.00342742	0.913922
HORVU.MOREX.r2.2HG0156670	TCONS_00016682	tran	mRNA	X38_CK	X38_Cd	Dw	5.55793e-05	0.00345292	-0.778468
HORVU.MOREX.r2.3HG0248560	TCONS_00030504	tran	mRNA	X38_CK	X38_Cd	Up	5.62527e-05	0.00348859	0.832146
HORVU.MOREX.r2.4HG0325400	HORVU.MOREX.r2.4HG0325400.1	tran	mRNA	X38_CK	X38_Cd	Up	5.62725e-05	0.00348859	0.727117
HORVU.MOREX.r2.6HG0448470	TCONS_00063544	tran	mRNA	X38_CK	X38_Cd	Up	5.65485e-05	0.003502	0.616437
HORVU.MOREX.r2.5HG0356320	TCONS_00050201	tran	mRNA	X38_CK	X38_Cd	Dw	5.71302e-05	0.0035343	-0.82206
HORVU.MOREX.r2.2HG0095090	HORVU.MOREX.r2.2HG0095090.1	tran	mRNA	X38_CK	X38_Cd	Up	5.72827e-05	0.00354	1.23831
HORVU.MOREX.r2.7HG0608730	HORVU.MOREX.r2.7HG0608730.1	tran	mRNA	X38_CK	X38_Cd	Dw	5.74594e-05	0.00354718	-1.3107
HORVU.MOREX.r2.2HG0165450	HORVU.MOREX.r2.2HG0165450.1	tran	mRNA	X38_CK	X38_Cd	Up	5.81202e-05	0.0035842	0.588047
HORVU.MOREX.r2.5HG0371630	TCONS_00051341	tran	mRNA	X38_CK	X38_Cd	Up	5.82769e-05	0.00359009	1.0301
HORVU.MOREX.r2.7HG0540770	HORVU.MOREX.r2.7HG0540770.1	tran	mRNA	X38_CK	X38_Cd	Up	5.85508e-05	0.00360318	1.4635
HORVU.MOREX.r2.3HG0252470	TCONS_00037536	tran	mRNA	X38_CK	X38_Cd	Up	5.9015e-05	0.00362434	0.866326
HORVU.MOREX.r2.4HG0317140	TCONS_00042129	tran	mRNA	X38_CK	X38_Cd	Up	5.90183e-05	0.00362434	0.72584
HORVU.MOREX.r2.7HG0611150	TCONS_00087385	tran	mRNA	X38_CK	X38_Cd	Up	5.91105e-05	0.00362621	2.45765
HORVU.MOREX.r2.1HG0035900	HORVU.MOREX.r2.1HG0035900.1	tran	mRNA	X38_CK	X38_Cd	Dw	5.93824e-05	0.00363908	-0.915796
HORVU.MOREX.r2.1HG0064350	HORVU.MOREX.r2.1HG0064350.1	tran	mRNA	X38_CK	X38_Cd	Up	5.96344e-05	0.00365071	1.49322
HORVU.MOREX.r2.3HG0246920	TCONS_00030382	tran	mRNA	X38_CK	X38_Cd	Dw	5.99327e-05	0.00366514	-1.59285
HORVU.MOREX.r2.6HG0465240	HORVU.MOREX.r2.6HG0465240.1	tran	mRNA	X38_CK	X38_Cd	Dw	6.00468e-05	0.0036683	-1.02345
HORVU.MOREX.r2.6HG0463280	HORVU.MOREX.r2.6HG0463280.1	tran	mRNA	X38_CK	X38_Cd	Up	6.02134e-05	0.00367465	1.01107
HORVU.MOREX.r2.5HG0352150	TCONS_00056730	tran	mRNA	X38_CK	X38_Cd	Dw	6.05282e-05	0.00369002	-2.36832
HORVU.MOREX.r2.4HG0343900	HORVU.MOREX.r2.4HG0343900.1	tran	mRNA	X38_CK	X38_Cd	Dw	6.19751e-05	0.0037743	-1.15718
HORVU.MOREX.r2.4HG0335780	HORVU.MOREX.r2.4HG0335780.1	tran	mRNA	X38_CK	X38_Cd	Dw	6.22444e-05	0.00378677	-0.792026
HORVU.MOREX.r2.2HG0116110	HORVU.MOREX.r2.2HG0116110.1	tran	mRNA	X38_CK	X38_Cd	Dw	6.25418e-05	0.00380092	-1.45123
HORVU.MOREX.r2.1HG0017110	HORVU.MOREX.r2.1HG0017110.1	tran	mRNA	X38_CK	X38_Cd	Up	6.28851e-05	0.00381388	2.47941
HORVU.MOREX.r2.7HG0599910	TCONS_00086588	tran	mRNA	X38_CK	X38_Cd	Up	6.2883e-05	0.00381388	7.1664
HORVU.MOREX.r2.3HG0274320	HORVU.MOREX.r2.3HG0274320.1	tran	mRNA	X38_CK	X38_Cd	Up	6.29726e-05	0.00381524	0.811788
HORVU.MOREX.r2.4HG0295580	TCONS_00040604	tran	mRNA	X38_CK	X38_Cd	Up	6.37494e-05	0.00384804	0.673538
HORVU.MOREX.r2.5HG0372290	TCONS_00051399	tran	mRNA	X38_CK	X38_Cd	Up	6.3842e-05	0.00384804	6.84624
HORVU.MOREX.r2.6HG0449400	TCONS_00063616	tran	lncRNA	X38_CK	X38_Cd	Dw	6.38355e-05	0.00384804	-1.74399
HORVU.MOREX.r2.6HG0449400	TCONS_00063618	tran	lncRNA	X38_CK	X38_Cd	Dw	6.38355e-05	0.00384804	-1.74399
HORVU.MOREX.r2.7HG0545910	TCONS_00075934	tran	mRNA	X38_CK	X38_Cd	Up	6.38313e-05	0.00384804	1.54874
HORVU.MOREX.r2.1HG0038610	HORVU.MOREX.r2.1HG0038610.1	tran	mRNA	X38_CK	X38_Cd	Dw	6.45299e-05	0.00388551	-0.816282
HORVU.MOREX.r2.2HG0114990	HORVU.MOREX.r2.2HG0114990.1	tran	mRNA	X38_CK	X38_Cd	Up	6.57477e-05	0.00395072	1.20826
HORVU.MOREX.r2.6HG0460890	HORVU.MOREX.r2.6HG0460890.1	tran	mRNA	X38_CK	X38_Cd	Up	6.56992e-05	0.00395072	1.15607
HORVU.MOREX.r2.4HG0336100	HORVU.MOREX.r2.4HG0336100.1	tran	mRNA	X38_CK	X38_Cd	Dw	6.60316e-05	0.00396372	-1.37575
HORVU.MOREX.r2.4HG0283610	TCONS_00044958	tran	mRNA	X38_CK	X38_Cd	Up	6.61043e-05	0.00396403	1.42828
HORVU.MOREX.r2.4HG0326390	TCONS_00042802	tran	mRNA	X38_CK	X38_Cd	Up	6.71446e-05	0.0040223	1.2335
HORVU.MOREX.r2.6HG0505730	TCONS_00067700	tran	mRNA	X38_CK	X38_Cd	Up	6.73168e-05	0.0040285	0.615696
HORVU.MOREX.r2.1HG0016800	HORVU.MOREX.r2.1HG0016800.1	tran	mRNA	X38_CK	X38_Cd	Up	6.75139e-05	0.00403028	1.35965
HORVU.MOREX.r2.2HG0165250	TCONS_00024625	tran	mRNA	X38_CK	X38_Cd	Up	6.7547e-05	0.00403028	1.70814
HORVU.MOREX.r2.6HG0475410	TCONS_00065501	tran	lncRNA	X38_CK	X38_Cd	Up	6.75527e-05	0.00403028	2.78986
HORVU.MOREX.r2.6HG0502510	TCONS_00067445	tran	mRNA	X38_CK	X38_Cd	Up	6.77503e-05	0.00403796	0.606586
HORVU.MOREX.r2.2HG0173170	HORVU.MOREX.r2.2HG0173170.1	tran	mRNA	X38_CK	X38_Cd	Dw	6.80275e-05	0.00405037	-1.28064
HORVU.MOREX.r2.5HG0364740	HORVU.MOREX.r2.5HG0364740.1	tran	mRNA	X38_CK	X38_Cd	Up	6.81894e-05	0.00405589	1.37204
HORVU.MOREX.r2.7HG0543690	HORVU.MOREX.r2.7HG0543690.1	tran	mRNA	X38_CK	X38_Cd	Up	6.82864e-05	0.00405754	1.89554
XLOC_007308	TCONS_00010313	tran	lncRNA	X38_CK	X38_Cd	Dw	6.86618e-05	0.00407572	-1.16886
HORVU.MOREX.r2.3HG0214800	HORVU.MOREX.r2.3HG0214800.1	tran	mRNA	X38_CK	X38_Cd	Dw	6.93244e-05	0.00411089	-0.811404
HORVU.MOREX.r2.7HG0621880	HORVU.MOREX.r2.7HG0621880.1	tran	mRNA	X38_CK	X38_Cd	Dw	7.00967e-05	0.0041512	-1.81186
XLOC_030067	TCONS_00042494	tran	lncRNA	X38_CK	X38_Cd	Dw	7.01457e-05	0.0041512	-2.36308
HORVU.MOREX.r2.5HG0355130	TCONS_00056955	tran	mRNA	X38_CK	X38_Cd	Dw	7.0551e-05	0.00417097	-2.68392
XLOC_061760	TCONS_00087151	tran	lncRNA	X38_CK	X38_Cd	Dw	7.0865e-05	0.00418531	-0.751066
XLOC_030872	TCONS_00043656	tran	lncRNA	X38_CK	X38_Cd	Up	7.12073e-05	0.0042013	2.76524
HORVU.MOREX.r2.2HG0128950	HORVU.MOREX.r2.2HG0128950.1	tran	mRNA	X38_CK	X38_Cd	Up	7.1476e-05	0.00421292	0.656273
HORVU.MOREX.r2.3HG0250740	HORVU.MOREX.r2.3HG0250740.1	tran	mRNA	X38_CK	X38_Cd	Dw	7.17097e-05	0.00422245	-1.45643
HORVU.MOREX.r2.4HG0293900	TCONS_00045692	tran	mRNA	X38_CK	X38_Cd	Dw	7.17992e-05	0.00422348	-0.890278
HORVU.MOREX.r2.1HG0055440	TCONS_00003951	tran	mRNA	X38_CK	X38_Cd	Dw	7.34715e-05	0.00431752	-0.677091
HORVU.MOREX.r2.UnG0630280	TCONS_00089750	tran	mRNA	X38_CK	X38_Cd	Dw	7.50871e-05	0.00440804	-0.627775
HORVU.MOREX.r2.6HG0478730	TCONS_00065751	tran	mRNA	X38_CK	X38_Cd	Up	7.56967e-05	0.00443939	0.916443
HORVU.MOREX.r2.4HG0346550	HORVU.MOREX.r2.4HG0346550.1	tran	mRNA	X38_CK	X38_Cd	Up	7.74173e-05	0.00453123	0.771384
HORVU.MOREX.r2.6HG0474750	TCONS_00065425	tran	mRNA	X38_CK	X38_Cd	Dw	7.73622e-05	0.00453123	-7.77781
HORVU.MOREX.r2.7HG0603070	HORVU.MOREX.r2.7HG0603070.1	tran	mRNA	X38_CK	X38_Cd	Up	7.8017e-05	0.00456178	1.83585
HORVU.MOREX.r2.1HG0006540	TCONS_00006042	tran	mRNA	X38_CK	X38_Cd	Up	7.82381e-05	0.00457015	0.675749
HORVU.MOREX.r2.2HG0131020	HORVU.MOREX.r2.2HG0131020.1	tran	mRNA	X38_CK	X38_Cd	Up	7.84901e-05	0.00458031	1.82846
HORVU.MOREX.r2.1HG0014210	TCONS_00006569	tran	mRNA	X38_CK	X38_Cd	Up	7.92425e-05	0.00460132	6.80006
HORVU.MOREX.r2.2HG0142260	TCONS_00015686	tran	mRNA	X38_CK	X38_Cd	Up	7.90706e-05	0.00460132	1.59606
HORVU.MOREX.r2.5HG0352830	HORVU.MOREX.r2.5HG0352830.1	tran	mRNA	X38_CK	X38_Cd	Up	7.92103e-05	0.00460132	1.67828
HORVU.MOREX.r2.5HG0412030	HORVU.MOREX.r2.5HG0412030.1	tran	mRNA	X38_CK	X38_Cd	Up	7.91396e-05	0.00460132	2.91672
HORVU.MOREX.r2.7HG0549590	HORVU.MOREX.r2.7HG0549590.1	tran	mRNA	X38_CK	X38_Cd	Up	7.89515e-05	0.00460132	2.37403
HORVU.MOREX.r2.3HG0265580	HORVU.MOREX.r2.3HG0265580.1	tran	mRNA	X38_CK	X38_Cd	Up	7.96359e-05	0.00461959	1.30836
HORVU.MOREX.r2.4HG0316240	TCONS_00042051	tran	mRNA	X38_CK	X38_Cd	Dw	8.13083e-05	0.0047073	-1.39359
XLOC_061534	TCONS_00086856	tran	lncRNA	X38_CK	X38_Cd	Dw	8.12637e-05	0.0047073	-1.38272
HORVU.MOREX.r2.6HG0461570	HORVU.MOREX.r2.6HG0461570.1	tran	mRNA	X38_CK	X38_Cd	Up	8.163e-05	0.00472126	0.686347
HORVU.MOREX.r2.5HG0439700	HORVU.MOREX.r2.5HG0439700.1	tran	mRNA	X38_CK	X38_Cd	Dw	8.26367e-05	0.00477478	-1.49345
HORVU.MOREX.r2.7HG0608740	HORVU.MOREX.r2.7HG0608740.1	tran	mRNA	X38_CK	X38_Cd	Dw	8.33e-05	0.00480836	-0.950086
HORVU.MOREX.r2.5HG0400900	HORVU.MOREX.r2.5HG0400900.1	tran	mRNA	X38_CK	X38_Cd	Up	8.33998e-05	0.00480939	0.701507
HORVU.MOREX.r2.4HG0336030	TCONS_00043510	tran	mRNA	X38_CK	X38_Cd	Up	8.41383e-05	0.00483401	0.567198
HORVU.MOREX.r2.6HG0496840	TCONS_00072579	tran	lncRNA	X38_CK	X38_Cd	Up	8.4146e-05	0.00483401	1.54603
HORVU.MOREX.r2.7HG0583780	TCONS_00078660	tran	mRNA	X38_CK	X38_Cd	Dw	8.41564e-05	0.00483401	-0.525295
XLOC_012664	TCONS_00017805	tran	lncRNA	X38_CK	X38_Cd	Dw	8.39189e-05	0.00483401	-0.715488
HORVU.MOREX.r2.4HG0287310	HORVU.MOREX.r2.4HG0287310.1	tran	mRNA	X38_CK	X38_Cd	Up	8.49592e-05	0.00487534	3.12114
HORVU.MOREX.r2.1HG0040480	HORVU.MOREX.r2.1HG0040480.1	tran	mRNA	X38_CK	X38_Cd	Up	8.55243e-05	0.00488864	1.42504
HORVU.MOREX.r2.4HG0329560	HORVU.MOREX.r2.4HG0329560.1	tran	mRNA	X38_CK	X38_Cd	Up	8.53847e-05	0.00488864	1.61387
HORVU.MOREX.r2.4HG0335340	HORVU.MOREX.r2.4HG0335340.1	tran	mRNA	X38_CK	X38_Cd	Up	8.54573e-05	0.00488864	3.02973
HORVU.MOREX.r2.6HG0452010	HORVU.MOREX.r2.6HG0452010.1	tran	mRNA	X38_CK	X38_Cd	Dw	8.52765e-05	0.00488864	-1.09668
HORVU.MOREX.r2.2HG0078890	HORVU.MOREX.r2.2HG0078890.1	tran	mRNA	X38_CK	X38_Cd	Up	8.6171e-05	0.00492081	1.00483
HORVU.MOREX.r2.7HG0563210	HORVU.MOREX.r2.7HG0563210.1	tran	mRNA	X38_CK	X38_Cd	Dw	8.67039e-05	0.00494161	-7.25169
XLOC_005940	TCONS_00008416	tran	lncRNA	X38_CK	X38_Cd	Up	8.66527e-05	0.00494161	1.62684
HORVU.MOREX.r2.5HG0411930	TCONS_00061105	tran	mRNA	X38_CK	X38_Cd	Up	8.7088e-05	0.00495869	0.743938
HORVU.MOREX.r2.7HG0599330	HORVU.MOREX.r2.7HG0599330.1	tran	mRNA	X38_CK	X38_Cd	Up	8.74371e-05	0.00497374	1.7726
HORVU.MOREX.r2.2HG0166600	HORVU.MOREX.r2.2HG0166600.1	tran	mRNA	X38_CK	X38_Cd	Up	8.78198e-05	0.00498583	1.56211
HORVU.MOREX.r2.6HG0460340	TCONS_00069992	tran	mRNA	X38_CK	X38_Cd	Up	8.77592e-05	0.00498583	1.05534
HORVU.MOREX.r2.6HG0515700	TCONS_00073832	tran	mRNA	X38_CK	X38_Cd	Up	8.7973e-05	0.0049897	0.764029
HORVU.MOREX.r2.3HG0248170	HORVU.MOREX.r2.3HG0248170.1	tran	mRNA	X38_CK	X38_Cd	Dw	8.8176e-05	0.00499638	-1.28154
HORVU.MOREX.r2.7HG0624070	TCONS_00088303	tran	mRNA	X38_CK	X38_Cd	Dw	8.87868e-05	0.00502614	-1.54954
HORVU.MOREX.r2.2HG0126680	TCONS_00021969	tran	mRNA	X38_CK	X38_Cd	Up	8.98858e-05	0.00507855	0.738955
HORVU.MOREX.r2.4HG0333690	HORVU.MOREX.r2.4HG0333690.1	tran	mRNA	X38_CK	X38_Cd	Up	8.98618e-05	0.00507855	1.68938
HORVU.MOREX.r2.6HG0471350	HORVU.MOREX.r2.6HG0471350.1	tran	lncRNA	X38_CK	X38_Cd	Up	9.06644e-05	0.00511761	1.18081
HORVU.MOREX.r2.4HG0319420	TCONS_00047637	tran	lncRNA	X38_CK	X38_Cd	Dw	9.09236e-05	0.00512731	-1.67733
XLOC_063663	TCONS_00089788	tran	lncRNA	X38_CK	X38_Cd	Dw	9.17545e-05	0.00516919	-3.05496
HORVU.MOREX.r2.2HG0091330	HORVU.MOREX.r2.2HG0091330.1	tran	mRNA	X38_CK	X38_Cd	Dw	9.36359e-05	0.00527012	-0.785918
HORVU.MOREX.r2.7HG0562850	TCONS_00077150	tran	mRNA	X38_CK	X38_Cd	Up	9.40018e-05	0.00528564	3.20675
HORVU.MOREX.r2.4HG0316320	TCONS_00047416	tran	lncRNA	X38_CK	X38_Cd	Dw	9.45539e-05	0.00531159	-2.16632
HORVU.MOREX.r2.5HG0428470	TCONS_00055183	tran	lncRNA	X38_CK	X38_Cd	Up	9.48767e-05	0.00532462	1.14772
HORVU.MOREX.r2.2HG0083510	TCONS_00018746	tran	mRNA	X38_CK	X38_Cd	Up	9.50802e-05	0.00533094	0.874902
HORVU.MOREX.r2.7HG0595840	TCONS_00086284	tran	lncRNA	X38_CK	X38_Cd	Dw	9.54482e-05	0.00534136	-3.27958
XLOC_041123	TCONS_00058238	tran	lncRNA	X38_CK	X38_Cd	Dw	9.54079e-05	0.00534136	-2.34602
HORVU.MOREX.r2.5HG0442310	HORVU.MOREX.r2.5HG0442310.1	tran	mRNA	X38_CK	X38_Cd	Up	9.56421e-05	0.00534711	6.72255
HORVU.MOREX.r2.4HG0328880	TCONS_00048225	tran	mRNA	X38_CK	X38_Cd	Dw	9.68366e-05	0.00540359	-8.64384
XLOC_036755	TCONS_00052032	tran	lncRNA	X38_CK	X38_Cd	Dw	9.67898e-05	0.00540359	-0.391535
HORVU.MOREX.r2.5HG0418670	TCONS_00061568	tran	mRNA	X38_CK	X38_Cd	Dw	9.74752e-05	0.00543406	-0.920625
HORVU.MOREX.r2.5HG0356770	HORVU.MOREX.r2.5HG0356770.1	tran	mRNA	X38_CK	X38_Cd	Dw	9.88967e-05	0.00550807	-1.48936
XLOC_041681	TCONS_00059011	tran	lncRNA	X38_CK	X38_Cd	Dw	9.9611e-05	0.00554259	-1.90258
HORVU.MOREX.r2.3HG0262060	HORVU.MOREX.r2.3HG0262060.1	tran	mRNA	X38_CK	X38_Cd	Up	9.9707e-05	0.00554267	0.992036
HORVU.MOREX.r2.4HG0324670	TCONS_00047942	tran	mRNA	X38_CK	X38_Cd	Dw	0.000100125	0.00556065	-6.36445
HORVU.MOREX.r2.2HG0083220	TCONS_00018717	tran	mRNA	X38_CK	X38_Cd	Up	0.00010024	0.00556176	0.611056
HORVU.MOREX.r2.5HG0385150	HORVU.MOREX.r2.5HG0385150.1	tran	mRNA	X38_CK	X38_Cd	Up	0.000101559	0.00562961	1.56741
HORVU.MOREX.r2.7HG0574730	TCONS_00078052	tran	mRNA	X38_CK	X38_Cd	Up	0.000101921	0.00564436	0.645404
HORVU.MOREX.r2.7HG0551480	HORVU.MOREX.r2.7HG0551480.1	tran	mRNA	X38_CK	X38_Cd	Dw	0.000104205	0.00576541	-0.794825
HORVU.MOREX.r2.7HG0624010	HORVU.MOREX.r2.7HG0624010.1	tran	mRNA	X38_CK	X38_Cd	Dw	0.000104353	0.00576811	-4.19461
HORVU.MOREX.r2.2HG0170290	TCONS_00017624	tran	lncRNA	X38_CK	X38_Cd	Dw	0.000104814	0.00578814	-0.679327
HORVU.MOREX.r2.3HG0227590	HORVU.MOREX.r2.3HG0227590.1	tran	mRNA	X38_CK	X38_Cd	Up	0.000105843	0.0058395	1.07129
HORVU.MOREX.r2.6HG0483180	TCONS_00071595	tran	mRNA	X38_CK	X38_Cd	Dw	0.000106002	0.00584277	-0.550627
HORVU.MOREX.r2.3HG0192380	TCONS_00026483	tran	mRNA	X38_CK	X38_Cd	Dw	0.000106147	0.00584526	-1.11289
HORVU.MOREX.r2.4HG0279630	HORVU.MOREX.r2.4HG0279630.1	tran	mRNA	X38_CK	X38_Cd	Up	0.000106897	0.00588105	2.32011
HORVU.MOREX.r2.1HG0077220	TCONS_00005416	tran	mRNA	X38_CK	X38_Cd	Up	0.000107966	0.0059287	1.75336
HORVU.MOREX.r2.5HG0439660	HORVU.MOREX.r2.5HG0439660.1	tran	mRNA	X38_CK	X38_Cd	Up	0.000107867	0.0059287	1.92561
HORVU.MOREX.r2.4HG0283530	HORVU.MOREX.r2.4HG0283530.1	tran	mRNA	X38_CK	X38_Cd	Up	0.000108181	0.00593499	1.32462
HORVU.MOREX.r2.2HG0166760	HORVU.MOREX.r2.2HG0166760.1	tran	mRNA	X38_CK	X38_Cd	Dw	0.000108291	0.00593544	-1.24612
HORVU.MOREX.r2.3HG0236730	TCONS_00036398	tran	mRNA	X38_CK	X38_Cd	Dw	0.000108504	0.00593605	-0.557637
HORVU.MOREX.r2.6HG0471130	HORVU.MOREX.r2.6HG0471130.1	tran	mRNA	X38_CK	X38_Cd	Up	0.000108454	0.00593605	1.12217
HORVU.MOREX.r2.5HG0415870	HORVU.MOREX.r2.5HG0415870.1	tran	mRNA	X38_CK	X38_Cd	Up	0.000109003	0.00595779	1.02407
HORVU.MOREX.r2.1HG0053600	TCONS_00003826	tran	mRNA	X38_CK	X38_Cd	Up	0.000109202	0.00596311	0.512753
HORVU.MOREX.r2.5HG0398540	TCONS_00060186	tran	mRNA	X38_CK	X38_Cd	Dw	0.000110152	0.00600382	-0.996884
HORVU.MOREX.r2.5HG0405910	HORVU.MOREX.r2.5HG0405910.1	tran	mRNA	X38_CK	X38_Cd	Up	0.000110121	0.00600382	1.28672
XLOC_024547	TCONS_00034690	tran	lncRNA	X38_CK	X38_Cd	Dw	0.000111636	0.00607904	-1.15332
HORVU.MOREX.r2.2HG0150000	HORVU.MOREX.r2.2HG0150000.1	tran	mRNA	X38_CK	X38_Cd	Dw	0.000111893	0.00608738	-2.35312
HORVU.MOREX.r2.1HG0069140	TCONS_00004914	tran	mRNA	X38_CK	X38_Cd	Dw	0.00011242	0.00611039	-1.42866
HORVU.MOREX.r2.1HG0062200	TCONS_00009985	tran	mRNA	X38_CK	X38_Cd	Up	0.000112578	0.00611118	1.39445
HORVU.MOREX.r2.3HG0189220	TCONS_00032917	tran	mRNA	X38_CK	X38_Cd	Dw	0.000112643	0.00611118	-0.801672
HORVU.MOREX.r2.4HG0333190	HORVU.MOREX.r2.4HG0333190.1	tran	mRNA	X38_CK	X38_Cd	Up	0.000113108	0.00613075	0.781977
HORVU.MOREX.r2.7HG0624080	TCONS_00088307	tran	lncRNA	X38_CK	X38_Cd	Dw	0.000115597	0.00625772	-1.42347
XLOC_045691	TCONS_00064589	tran	lncRNA	X38_CK	X38_Cd	Dw	0.000115664	0.00625772	-0.777351
HORVU.MOREX.r2.2HG0105550	HORVU.MOREX.r2.2HG0105550.1	tran	mRNA	X38_CK	X38_Cd	Up	0.000116328	0.0062878	1.34164
HORVU.MOREX.r2.3HG0198350	TCONS_00026945	tran	mRNA	X38_CK	X38_Cd	Dw	0.000116676	0.00630084	-1.28152
HORVU.MOREX.r2.7HG0594960	TCONS_00086201	tran	mRNA	X38_CK	X38_Cd	Up	0.000118779	0.00640851	0.593811
HORVU.MOREX.r2.3HG0204950	TCONS_00033955	tran	mRNA	X38_CK	X38_Cd	Up	0.000119205	0.00641243	1.42101
HORVU.MOREX.r2.6HG0458340	HORVU.MOREX.r2.6HG0458340.1	tran	mRNA	X38_CK	X38_Cd	Up	0.000119084	0.00641243	1.12159
HORVU.MOREX.r2.6HG0495590	TCONS_00072503	tran	mRNA	X38_CK	X38_Cd	Up	0.00011922	0.00641243	0.89723
HORVU.MOREX.r2.7HG0618350	TCONS_00087905	tran	mRNA	X38_CK	X38_Cd	Dw	0.000119289	0.00641243	-6.20896
HORVU.MOREX.r2.4HG0277500	TCONS_00044535	tran	mRNA	X38_CK	X38_Cd	Up	0.000119643	0.00642554	0.513217
HORVU.MOREX.r2.2HG0160720	HORVU.MOREX.r2.2HG0160720.1	tran	mRNA	X38_CK	X38_Cd	Dw	0.000120705	0.00647076	-1.64839
HORVU.MOREX.r2.3HG0203230	TCONS_00027293	tran	mRNA	X38_CK	X38_Cd	Up	0.000120599	0.00647076	7.20828
HORVU.MOREX.r2.6HG0520900	TCONS_00074191	tran	mRNA	X38_CK	X38_Cd	Dw	0.00012082	0.00647099	-2.14775
HORVU.MOREX.r2.4HG0342770	TCONS_00044009	tran	mRNA	X38_CK	X38_Cd	Dw	0.000121432	0.00649783	-2.4675
HORVU.MOREX.r2.2HG0170360	TCONS_00024945	tran	mRNA	X38_CK	X38_Cd	Dw	0.000122017	0.00652319	-0.801632
HORVU.MOREX.r2.5HG0364270	TCONS_00057667	tran	mRNA	X38_CK	X38_Cd	Up	0.000123376	0.00657887	0.957761
HORVU.MOREX.r2.7HG0612550	TCONS_00087510	tran	mRNA	X38_CK	X38_Cd	Up	0.000123395	0.00657887	1.1259
XLOC_016480	TCONS_00023324	tran	lncRNA	X38_CK	X38_Cd	Dw	0.000123354	0.00657887	-0.769466
HORVU.MOREX.r2.2HG0142080	TCONS_00015661	tran	mRNA	X38_CK	X38_Cd	Up	0.000123658	0.00658135	0.513463
HORVU.MOREX.r2.3HG0194500	HORVU.MOREX.r2.3HG0194500.1	tran	mRNA	X38_CK	X38_Cd	Dw	0.000123666	0.00658135	-2.96557
HORVU.MOREX.r2.3HG0203220	TCONS_00027285	tran	mRNA	X38_CK	X38_Cd	Dw	0.000123962	0.0065911	-7.16766
HORVU.MOREX.r2.3HG0251980	TCONS_00037501	tran	mRNA	X38_CK	X38_Cd	Up	0.000124388	0.00660777	1.75049
HORVU.MOREX.r2.2HG0111460	HORVU.MOREX.r2.2HG0111460.1	tran	mRNA	X38_CK	X38_Cd	Up	0.000124811	0.00662424	1.32123
HORVU.MOREX.r2.3HG0208240	TCONS_00034211	tran	mRNA	X38_CK	X38_Cd	Dw	0.000125161	0.00663681	-0.888739
HORVU.MOREX.r2.7HG0597150	HORVU.MOREX.r2.7HG0597150.1	tran	mRNA	X38_CK	X38_Cd	Up	0.000126061	0.00667247	0.7978
HORVU.MOREX.r2.7HG0624110	TCONS_00088324	tran	lncRNA	X38_CK	X38_Cd	Dw	0.000125997	0.00667247	-2.10472
HORVU.MOREX.r2.6HG0484870	HORVU.MOREX.r2.6HG0484870.1	tran	mRNA	X38_CK	X38_Cd	Dw	0.000126434	0.00668621	-0.64118
HORVU.MOREX.r2.1HG0059880	TCONS_00004267	tran	mRNA	X38_CK	X38_Cd	Up	0.000126866	0.006703	1.13224
HORVU.MOREX.r2.3HG0242680	HORVU.MOREX.r2.3HG0242680.1	tran	mRNA	X38_CK	X38_Cd	Up	0.000127464	0.0067285	0.825918
HORVU.MOREX.r2.4HG0294290	HORVU.MOREX.r2.4HG0294290.1	tran	mRNA	X38_CK	X38_Cd	Up	0.000128859	0.00679605	0.970241
XLOC_022700	TCONS_00032068	tran	lncRNA	X38_CK	X38_Cd	Up	0.000129754	0.0068371	1.85498
XLOC_061631	TCONS_00086982	tran	lncRNA	X38_CK	X38_Cd	Dw	0.000130828	0.00688752	-0.913497
HORVU.MOREX.r2.6HG0469370	TCONS_00065030	tran	mRNA	X38_CK	X38_Cd	Up	0.000131103	0.0068958	0.780211
HORVU.MOREX.r2.2HG0165750	HORVU.MOREX.r2.2HG0165750.1	tran	mRNA	X38_CK	X38_Cd	Up	0.000131492	0.00691007	1.7966
HORVU.MOREX.r2.2HG0094120	HORVU.MOREX.r2.2HG0094120.1	tran	mRNA	X38_CK	X38_Cd	Up	0.000131744	0.00691711	1.23558
HORVU.MOREX.r2.7HG0591390	TCONS_00085952	tran	mRNA	X38_CK	X38_Cd	Up	0.000132153	0.00693235	2.53674
HORVU.MOREX.r2.7HG0593210	TCONS_00086090	tran	lncRNA	X38_CK	X38_Cd	Dw	0.000132807	0.00696042	-2.49585
HORVU.MOREX.r2.3HG0234560	HORVU.MOREX.r2.3HG0234560.1	tran	mRNA	X38_CK	X38_Cd	Up	0.000133304	0.00698027	2.20561
HORVU.MOREX.r2.3HG0186220	TCONS_00026062	tran	mRNA	X38_CK	X38_Cd	Up	0.000134504	0.00703682	1.25178
HORVU.MOREX.r2.7HG0559930	TCONS_00076927	tran	mRNA	X38_CK	X38_Cd	Dw	0.000134796	0.0070458	-1.16991
HORVU.MOREX.r2.7HG0559660	TCONS_00083780	tran	mRNA	X38_CK	X38_Cd	Up	0.00013511	0.00705594	0.510096
HORVU.MOREX.r2.4HG0329890	TCONS_00043068	tran	mRNA	X38_CK	X38_Cd	Up	0.00013535	0.00706218	1.01121
HORVU.MOREX.r2.2HG0173550	TCONS_00017862	tran	mRNA	X38_CK	X38_Cd	Up	0.000135496	0.00706348	1.06447
HORVU.MOREX.r2.3HG0246100	TCONS_00037041	tran	mRNA	X38_CK	X38_Cd	Up	0.000135725	0.00706917	0.864248
HORVU.MOREX.r2.5HG0427420	HORVU.MOREX.r2.5HG0427420.1	tran	mRNA	X38_CK	X38_Cd	Up	0.000136035	0.00707902	1.06521
HORVU.MOREX.r2.1HG0036260	HORVU.MOREX.r2.1HG0036260.1	tran	mRNA	X38_CK	X38_Cd	Dw	0.000136276	0.00708529	-1.7219
HORVU.MOREX.r2.5HG0367270	TCONS_00051005	tran	lncRNA	X38_CK	X38_Cd	Up	0.00013641	0.00708592	0.572212
XLOC_020625	TCONS_00029139	tran	lncRNA	X38_CK	X38_Cd	Dw	0.000137194	0.00712035	-0.962817
HORVU.MOREX.r2.3HG0191300	TCONS_00033040	tran	mRNA	X38_CK	X38_Cd	Up	0.00013754	0.00713202	0.395129
HORVU.MOREX.r2.7HG0619500	HORVU.MOREX.r2.7HG0619500.1	tran	mRNA	X38_CK	X38_Cd	Up	0.000139739	0.00723966	4.26885
HORVU.MOREX.r2.3HG0209130	HORVU.MOREX.r2.3HG0209130.1	tran	mRNA	X38_CK	X38_Cd	Dw	0.000140105	0.00725222	-1.17583
HORVU.MOREX.r2.5HG0419800	TCONS_00054557	tran	mRNA	X38_CK	X38_Cd	Dw	0.00014103	0.00729362	-7.56193
HORVU.MOREX.r2.6HG0459050	HORVU.MOREX.r2.6HG0459050.1	tran	mRNA	X38_CK	X38_Cd	Up	0.000141634	0.00731843	0.741047
HORVU.MOREX.r2.7HG0624090	HORVU.MOREX.r2.7HG0624090.1	tran	lncRNA	X38_CK	X38_Cd	Dw	0.000142274	0.00734504	-11.9344
XLOC_063570	TCONS_00089678	tran	lncRNA	X38_CK	X38_Cd	Dw	0.00014248	0.0073492	-1.64257
HORVU.MOREX.r2.1HG0000890	TCONS_00000048	tran	mRNA	X38_CK	X38_Cd	Up	0.000144272	0.0074351	1.59801
HORVU.MOREX.r2.4HG0345700	TCONS_00044207	tran	mRNA	X38_CK	X38_Cd	Dw	0.000144431	0.00743672	-1.65053
HORVU.MOREX.r2.4HG0338140	TCONS_00043710	tran	lncRNA	X38_CK	X38_Cd	Up	0.00014478	0.00744815	0.586143
HORVU.MOREX.r2.1HG0039000	TCONS_00008414	tran	mRNA	X38_CK	X38_Cd	Up	0.000145003	0.00745309	0.609073
HORVU.MOREX.r2.3HG0256360	TCONS_00031036	tran	mRNA	X38_CK	X38_Cd	Up	0.00014596	0.00749572	0.531619
HORVU.MOREX.r2.6HG0469330	TCONS_00070681	tran	mRNA	X38_CK	X38_Cd	Up	0.000146253	0.00750422	0.71221
HORVU.MOREX.r2.6HG0496150	HORVU.MOREX.r2.6HG0496150.1	tran	mRNA	X38_CK	X38_Cd	Up	0.000147417	0.0075573	1.09042
HORVU.MOREX.r2.4HG0309510	TCONS_00046893	tran	lncRNA	X38_CK	X38_Cd	Up	0.000147831	0.00757191	7.25637
HORVU.MOREX.r2.3HG0242810	HORVU.MOREX.r2.3HG0242810.1	tran	mRNA	X38_CK	X38_Cd	Up	0.000148105	0.00757932	1.27864
HORVU.MOREX.r2.7HG0550850	HORVU.MOREX.r2.7HG0550850.1	tran	mRNA	X38_CK	X38_Cd	Up	0.000148408	0.00758823	0.853529
XLOC_024680	TCONS_00034893	tran	lncRNA	X38_CK	X38_Cd	Dw	0.000148721	0.0075976	-4.97239
HORVU.MOREX.r2.1HG0075910	TCONS_00010937	tran	mRNA	X38_CK	X38_Cd	Up	0.00014906	0.0076083	0.748946
HORVU.MOREX.r2.1HG0041330	TCONS_00008570	tran	mRNA	X38_CK	X38_Cd	Up	0.000150506	0.00767544	0.924425
HORVU.MOREX.r2.4HG0288890	HORVU.MOREX.r2.4HG0288890.1	tran	mRNA	X38_CK	X38_Cd	Up	0.000151002	0.00768734	0.761505
HORVU.MOREX.r2.6HG0472030	TCONS_00065226	tran	mRNA	X38_CK	X38_Cd	Dw	0.000150967	0.00768734	-1.67491
HORVU.MOREX.r2.3HG0256920	HORVU.MOREX.r2.3HG0256920.1	tran	mRNA	X38_CK	X38_Cd	Up	0.00015263	0.00775003	2.1169
HORVU.MOREX.r2.4HG0329980	HORVU.MOREX.r2.4HG0329980.1	tran	mRNA	X38_CK	X38_Cd	Up	0.000152628	0.00775003	7.73721
HORVU.MOREX.r2.6HG0450740	TCONS_00069341	tran	mRNA	X38_CK	X38_Cd	Up	0.000152432	0.00775003	0.680289
HORVU.MOREX.r2.7HG0550290	TCONS_00076246	tran	mRNA	X38_CK	X38_Cd	Up	0.000153374	0.00778107	0.536425
XLOC_005044	TCONS_00007062	tran	lncRNA	X38_CK	X38_Cd	Dw	0.000153524	0.00778195	-1.33514
HORVU.MOREX.r2.1HG0062170	HORVU.MOREX.r2.1HG0062170.1	tran	mRNA	X38_CK	X38_Cd	Up	0.000155055	0.00785275	1.31727
XLOC_021806	TCONS_00030823	tran	lncRNA	X38_CK	X38_Cd	Dw	0.000157165	0.00795277	-1.15586
HORVU.MOREX.r2.2HG0147240	TCONS_00023414	tran	mRNA	X38_CK	X38_Cd	Up	0.000157533	0.00796385	1.86707
HORVU.MOREX.r2.2HG0159340	HORVU.MOREX.r2.2HG0159340.1	tran	mRNA	X38_CK	X38_Cd	Up	0.00015775	0.00796385	1.07753
HORVU.MOREX.r2.3HG0212240	TCONS_00034557	tran	mRNA	X38_CK	X38_Cd	Up	0.000157907	0.00796385	0.823712
HORVU.MOREX.r2.6HG0454610	TCONS_00063969	tran	mRNA	X38_CK	X38_Cd	Dw	0.000157927	0.00796385	-1.66871
HORVU.MOREX.r2.6HG0521630	HORVU.MOREX.r2.6HG0521630.1	tran	mRNA	X38_CK	X38_Cd	Dw	0.000158995	0.00801081	-2.66714
XLOC_060583	TCONS_00085501	tran	lncRNA	X38_CK	X38_Cd	Dw	0.000161326	0.0081213	-0.91249
HORVU.MOREX.r2.1HG0023500	TCONS_00007378	tran	mRNA	X38_CK	X38_Cd	Up	0.000162684	0.0081756	0.762874
HORVU.MOREX.r2.3HG0207530	HORVU.MOREX.r2.3HG0207530.1	tran	mRNA	X38_CK	X38_Cd	Up	0.000162635	0.0081756	0.975829
HORVU.MOREX.r2.6HG0498280	HORVU.MOREX.r2.6HG0498280.1	tran	mRNA	X38_CK	X38_Cd	Dw	0.000163166	0.00819279	-1.03865
HORVU.MOREX.r2.1HG0055860	HORVU.MOREX.r2.1HG0055860.1	tran	mRNA	X38_CK	X38_Cd	Up	0.000163918	0.00821648	6.97971
XLOC_000367	TCONS_00000535	tran	lncRNA	X38_CK	X38_Cd	Dw	0.000163914	0.00821648	-0.826557
HORVU.MOREX.r2.7HG0611980	HORVU.MOREX.r2.7HG0611980.1	tran	mRNA	X38_CK	X38_Cd	Up	0.000164098	0.00821852	1.65449
HORVU.MOREX.r2.4HG0322500	TCONS_00042524	tran	lncRNA	X38_CK	X38_Cd	Up	0.000165285	0.00827087	6.78799
HORVU.MOREX.r2.5HG0389680	TCONS_00059544	tran	lncRNA	X38_CK	X38_Cd	Dw	0.000165908	0.00829496	-7.47368
HORVU.MOREX.r2.2HG0098000	HORVU.MOREX.r2.2HG0098000.1	tran	mRNA	X38_CK	X38_Cd	Dw	0.000166417	0.00831332	-0.850846
HORVU.MOREX.r2.1HG0000900	HORVU.MOREX.r2.1HG0000900.1	tran	mRNA	X38_CK	X38_Cd	Up	0.000166683	0.00831952	1.52856
HORVU.MOREX.r2.2HG0146370	HORVU.MOREX.r2.2HG0146370.1	tran	mRNA	X38_CK	X38_Cd	Up	0.000166914	0.00832399	1.48847
HORVU.MOREX.r2.7HG0574730	TCONS_00078053	tran	mRNA	X38_CK	X38_Cd	Up	0.00016744	0.00834312	0.458035
HORVU.MOREX.r2.6HG0465490	TCONS_00070351	tran	mRNA	X38_CK	X38_Cd	Dw	0.000168775	0.00840251	-0.841178
HORVU.MOREX.r2.2HG0136320	HORVU.MOREX.r2.2HG0136320.1	tran	mRNA	X38_CK	X38_Cd	Up	0.000169186	0.00841582	1.5243
HORVU.MOREX.r2.3HG0262580	HORVU.MOREX.r2.3HG0262580.1	tran	mRNA	X38_CK	X38_Cd	Up	0.000169502	0.00842441	1.30396
HORVU.MOREX.r2.4HG0337890	TCONS_00043681	tran	mRNA	X38_CK	X38_Cd	Dw	0.000170135	0.00844869	-2.19703
HORVU.MOREX.r2.1HG0023430	HORVU.MOREX.r2.1HG0023430.1	tran	mRNA	X38_CK	X38_Cd	Up	0.000170569	0.00846306	0.961957
HORVU.MOREX.r2.1HG0031700	HORVU.MOREX.r2.1HG0031700.1	tran	mRNA	X38_CK	X38_Cd	Dw	0.000171662	0.00851009	-1.26143
XLOC_014896	TCONS_00020937	tran	lncRNA	X38_CK	X38_Cd	Up	0.000171979	0.00851862	8.48845
HORVU.MOREX.r2.4HG0286030	TCONS_00045147	tran	mRNA	X38_CK	X38_Cd	Up	0.00017364	0.00859365	2.55269
HORVU.MOREX.r2.UnG0626460	TCONS_00088479	tran	lncRNA	X38_CK	X38_Cd	Dw	0.000174185	0.00861332	-3.54372
HORVU.MOREX.r2.3HG0230780	TCONS_00035958	tran	mRNA	X38_CK	X38_Cd	Up	0.000174547	0.00862396	0.973227
HORVU.MOREX.r2.7HG0608370	TCONS_00087174	tran	mRNA	X38_CK	X38_Cd	Up	0.000174938	0.008636	0.783182
HORVU.MOREX.r2.7HG0615590	TCONS_00080839	tran	mRNA	X38_CK	X38_Cd	Up	0.000179627	0.00886004	6.62103
HORVU.MOREX.r2.2HG0157240	TCONS_00016718	tran	mRNA	X38_CK	X38_Cd	Dw	0.000180129	0.00887733	-0.784818
HORVU.MOREX.r2.1HG0015010	HORVU.MOREX.r2.1HG0015010.1	tran	mRNA	X38_CK	X38_Cd	Up	0.000180702	0.00889809	0.643463
HORVU.MOREX.r2.4HG0303520	TCONS_00041128	tran	lncRNA	X38_CK	X38_Cd	Up	0.00018096	0.00890334	1.22671
HORVU.MOREX.r2.4HG0339420	TCONS_00043785	tran	mRNA	X38_CK	X38_Cd	Dw	0.000181489	0.00892185	-0.566054
HORVU.MOREX.r2.2HG0120290	TCONS_00021467	tran	mRNA	X38_CK	X38_Cd	Up	0.000183016	0.00898566	0.482354
HORVU.MOREX.r2.6HG0461000	TCONS_00070043	tran	mRNA	X38_CK	X38_Cd	Dw	0.000183093	0.00898566	-0.408326
HORVU.MOREX.r2.3HG0252430	TCONS_00037530	tran	mRNA	X38_CK	X38_Cd	Up	0.000183812	0.00901338	0.849983
HORVU.MOREX.r2.6HG0505640	HORVU.MOREX.r2.6HG0505640.1	tran	mRNA	X38_CK	X38_Cd	Up	0.000188753	0.00924796	1.02758
HORVU.MOREX.r2.6HG0474020	HORVU.MOREX.r2.6HG0474020.1	tran	mRNA	X38_CK	X38_Cd	Up	0.000189545	0.009279	0.530092
HORVU.MOREX.r2.4HG0345920	TCONS_00044223	tran	mRNA	X38_CK	X38_Cd	Dw	0.000191927	0.00938569	-1.81373
HORVU.MOREX.r2.5HG0387930	HORVU.MOREX.r2.5HG0387930.1	tran	mRNA	X38_CK	X38_Cd	Dw	0.000192044	0.00938569	-0.524041
HORVU.MOREX.r2.3HG0182920	TCONS_00025831	tran	mRNA	X38_CK	X38_Cd	Up	0.000192882	0.00941877	1.27016
HORVU.MOREX.r2.5HG0353000	TCONS_00049952	tran	mRNA	X38_CK	X38_Cd	Dw	0.000193403	0.00943634	-1.228
HORVU.MOREX.r2.4HG0339540	HORVU.MOREX.r2.4HG0339540.1	tran	mRNA	X38_CK	X38_Cd	Dw	0.0001962	0.00956485	-1.2698
HORVU.MOREX.r2.1HG0049020	HORVU.MOREX.r2.1HG0049020.1	tran	mRNA	X38_CK	X38_Cd	Up	0.0001965	0.00957154	1.13269
HORVU.MOREX.r2.6HG0521510	HORVU.MOREX.r2.6HG0521510.1	tran	mRNA	X38_CK	X38_Cd	Dw	0.000197	0.00958794	-2.50063
HORVU.MOREX.r2.2HG0138190	TCONS_00022757	tran	lncRNA	X38_CK	X38_Cd	Up	0.000197577	0.00960805	4.8482
HORVU.MOREX.r2.7HG0598650	TCONS_00086496	tran	mRNA	X38_CK	X38_Cd	Dw	0.00019807	0.00962404	-1.85513
HORVU.MOREX.r2.5HG0399180	TCONS_00060254	tran	mRNA	X38_CK	X38_Cd	Up	0.000200412	0.00972979	0.94413
HORVU.MOREX.r2.2HG0156320	HORVU.MOREX.r2.2HG0156320.1	tran	mRNA	X38_CK	X38_Cd	Up	0.000201702	0.00978429	2.15182
HORVU.MOREX.r2.5HG0413480	TCONS_00061211	tran	lncRNA	X38_CK	X38_Cd	Dw	0.000202216	0.00980114	-1.54749
HORVU.MOREX.r2.7HG0596210	TCONS_00079537	tran	mRNA	X38_CK	X38_Cd	Up	0.000203156	0.00983854	1.09432
HORVU.MOREX.r2.3HG0230480	HORVU.MOREX.r2.3HG0230480.1	tran	mRNA	X38_CK	X38_Cd	Dw	0.000203617	0.00985272	-1.87096
HORVU.MOREX.r2.5HG0389530	HORVU.MOREX.r2.5HG0389530.1	tran	mRNA	X38_CK	X38_Cd	Up	0.000204307	0.00987799	0.505881
HORVU.MOREX.r2.6HG0455510	TCONS_00064059	tran	mRNA	X38_CK	X38_Cd	Up	0.000206033	0.00995321	1.18866
HORVU.MOREX.r2.7HG0528520	HORVU.MOREX.r2.7HG0528520.1	tran	mRNA	X38_CK	X38_Cd	Dw	0.000207696	0.0100253	-0.930143
XLOC_049597	TCONS_00070020	tran	lncRNA	X38_CK	X38_Cd	Dw	0.000208256	0.0100441	-2.01293
HORVU.MOREX.r2.1HG0012500	HORVU.MOREX.r2.1HG0012500.1	tran	mRNA	X38_CK	X38_Cd	Up	0.000208881	0.0100659	1.46924
HORVU.MOREX.r2.5HG0370260	TCONS_00058059	tran	lncRNA	X38_CK	X38_Cd	Dw	0.000210152	0.0101157	-1.21589
HORVU.MOREX.r2.6HG0498580	TCONS_00072703	tran	mRNA	X38_CK	X38_Cd	Up	0.000210258	0.0101157	0.932267
HORVU.MOREX.r2.5HG0447450	HORVU.MOREX.r2.5HG0447450.1	tran	mRNA	X38_CK	X38_Cd	Up	0.000210722	0.0101297	0.397357
HORVU.MOREX.r2.3HG0197210	HORVU.MOREX.r2.3HG0197210.1	tran	mRNA	X38_CK	X38_Cd	Up	0.000210921	0.010131	0.995148
HORVU.MOREX.r2.7HG0564280	HORVU.MOREX.r2.7HG0564280.1	tran	mRNA	X38_CK	X38_Cd	Up	0.000211955	0.0101723	2.31936
HORVU.MOREX.r2.3HG0206460	TCONS_00034070	tran	mRNA	X38_CK	X38_Cd	Dw	0.000212235	0.0101774	-1.17424
HORVU.MOREX.r2.2HG0098000	TCONS_00019801	tran	mRNA	X38_CK	X38_Cd	Dw	0.000213368	0.0102234	-0.607757
HORVU.MOREX.r2.3HG0260010	TCONS_00038035	tran	mRNA	X38_CK	X38_Cd	Dw	0.000214024	0.0102464	-2.66968
HORVU.MOREX.r2.3HG0251770	HORVU.MOREX.r2.3HG0251770.1	tran	mRNA	X38_CK	X38_Cd	Up	0.000214763	0.0102734	1.62282
HORVU.MOREX.r2.1HG0018230	TCONS_00006925	tran	mRNA	X38_CK	X38_Cd	Up	0.000216797	0.0103623	0.845747
HORVU.MOREX.r2.3HG0220590	HORVU.MOREX.r2.3HG0220590.1	tran	lncRNA	X38_CK	X38_Cd	Up	0.000217616	0.010393	1.56407
HORVU.MOREX.r2.1HG0036770	TCONS_00008296	tran	mRNA	X38_CK	X38_Cd	Up	0.000218719	0.0104371	1.72456
HORVU.MOREX.r2.7HG0623150	TCONS_00088233	tran	mRNA	X38_CK	X38_Cd	Up	0.000220662	0.0105186	6.96177
XLOC_044782	TCONS_00063341	tran	lncRNA	X38_CK	X38_Cd	Dw	0.000220786	0.0105186	-2.83147
HORVU.MOREX.r2.5HG0390850	TCONS_00052601	tran	mRNA	X38_CK	X38_Cd	Up	0.000220981	0.0105194	0.430271
HORVU.MOREX.r2.7HG0604130	TCONS_00086888	tran	mRNA	X38_CK	X38_Cd	Up	0.000222835	0.010599	4.70245
HORVU.MOREX.r2.3HG0203470	HORVU.MOREX.r2.3HG0203470.1	tran	mRNA	X38_CK	X38_Cd	Up	0.000224532	0.0106711	1.42726
HORVU.MOREX.r2.3HG0211850	TCONS_00034520	tran	mRNA	X38_CK	X38_Cd	Up	0.000224876	0.0106788	0.522615
XLOC_033808	TCONS_00047870	tran	lncRNA	X38_CK	X38_Cd	Dw	0.000226795	0.0107612	-0.883702
HORVU.MOREX.r2.3HG0261450	TCONS_00031422	tran	mRNA	X38_CK	X38_Cd	Dw	0.000228598	0.010838	-0.923832
HORVU.MOREX.r2.5HG0381070	TCONS_00058900	tran	mRNA	X38_CK	X38_Cd	Dw	0.000230391	0.0109142	-0.771235
HORVU.MOREX.r2.7HG0599230	HORVU.MOREX.r2.7HG0599230.1	tran	mRNA	X38_CK	X38_Cd	Up	0.000232471	0.0110038	1.73082
HORVU.MOREX.r2.3HG0257740	TCONS_00031147	tran	mRNA	X38_CK	X38_Cd	Dw	0.000233251	0.0110318	-7.04837
HORVU.MOREX.r2.3HG0254980	TCONS_00030947	tran	mRNA	X38_CK	X38_Cd	Up	0.000233448	0.0110322	1.3662
HORVU.MOREX.r2.5HG0396840	TCONS_00060073	tran	mRNA	X38_CK	X38_Cd	Up	0.000234209	0.0110593	0.991609
HORVU.MOREX.r2.UnG0631240	TCONS_00088855	tran	lncRNA	X38_CK	X38_Cd	Up	0.000236476	0.0111574	1.85825
HORVU.MOREX.r2.4HG0282510	TCONS_00039644	tran	mRNA	X38_CK	X38_Cd	Up	0.000237667	0.0112045	1.09271
HORVU.MOREX.r2.6HG0463730	HORVU.MOREX.r2.6HG0463730.1	tran	mRNA	X38_CK	X38_Cd	Up	0.000238563	0.0112378	0.907487
HORVU.MOREX.r2.2HG0122830	TCONS_00021675	tran	lncRNA	X38_CK	X38_Cd	Dw	0.000241156	0.0113503	-0.752426
HORVU.MOREX.r2.4HG0344280	HORVU.MOREX.r2.4HG0344280.1	tran	mRNA	X38_CK	X38_Cd	Dw	0.00024134	0.0113503	-0.765466
HORVU.MOREX.r2.5HG0438150	HORVU.MOREX.r2.5HG0438150.1	tran	mRNA	X38_CK	X38_Cd	Up	0.000245679	0.0115452	0.701997
HORVU.MOREX.r2.2HG0129580	HORVU.MOREX.r2.2HG0129580.1	tran	mRNA	X38_CK	X38_Cd	Up	0.000247268	0.0116105	1.87743
HORVU.MOREX.r2.4HG0289800	TCONS_00040198	tran	mRNA	X38_CK	X38_Cd	Up	0.000247639	0.0116186	7.03448
HORVU.MOREX.r2.2HG0082280	TCONS_00018638	tran	mRNA	X38_CK	X38_Cd	Up	0.000248385	0.0116443	1.27619
HORVU.MOREX.r2.2HG0162940	HORVU.MOREX.r2.2HG0162940.1	tran	mRNA	X38_CK	X38_Cd	Up	0.000251163	0.0117464	0.844931
HORVU.MOREX.r2.3HG0194280	HORVU.MOREX.r2.3HG0194280.1	tran	mRNA	X38_CK	X38_Cd	Up	0.000250808	0.0117464	1.74153
HORVU.MOREX.r2.3HG0233930	HORVU.MOREX.r2.3HG0233930.1	tran	mRNA	X38_CK	X38_Cd	Up	0.000251124	0.0117464	0.652396
HORVU.MOREX.r2.4HG0323890	HORVU.MOREX.r2.4HG0323890.1	tran	mRNA	X38_CK	X38_Cd	Up	0.000253447	0.0118381	1.39276
XLOC_022151	TCONS_00031311	tran	lncRNA	X38_CK	X38_Cd	Dw	0.000253528	0.0118381	-1.85643
HORVU.MOREX.r2.1HG0028150	TCONS_00007728	tran	mRNA	X38_CK	X38_Cd	Dw	0.000254704	0.0118807	-2.3576
HORVU.MOREX.r2.1HG0051670	HORVU.MOREX.r2.1HG0051670.1	tran	mRNA	X38_CK	X38_Cd	Up	0.000254846	0.0118807	2.54821
HORVU.MOREX.r2.3HG0215060	TCONS_00034782	tran	mRNA	X38_CK	X38_Cd	Dw	0.000256142	0.0119316	-0.710454
HORVU.MOREX.r2.3HG0191440	HORVU.MOREX.r2.3HG0191440.1	tran	mRNA	X38_CK	X38_Cd	Dw	0.000256529	0.0119402	-5.68791
HORVU.MOREX.r2.5HG0389850	HORVU.MOREX.r2.5HG0389850.1	tran	mRNA	X38_CK	X38_Cd	Dw	0.000257729	0.0119865	-1.28888
HORVU.MOREX.r2.2HG0132760	TCONS_00015002	tran	mRNA	X38_CK	X38_Cd	Up	0.000258289	0.0120031	0.803338
HORVU.MOREX.r2.2HG0129660	HORVU.MOREX.r2.2HG0129660.1	tran	mRNA	X38_CK	X38_Cd	Up	0.00026022	0.01208	0.954705
HORVU.MOREX.r2.5HG0363030	HORVU.MOREX.r2.5HG0363030.1	tran	mRNA	X38_CK	X38_Cd	Up	0.000260356	0.01208	1.49838
HORVU.MOREX.r2.1HG0012520	HORVU.MOREX.r2.1HG0012520.1	tran	mRNA	X38_CK	X38_Cd	Up	0.000261177	0.0121085	0.868854
HORVU.MOREX.r2.7HG0618970	HORVU.MOREX.r2.7HG0618970.1	tran	mRNA	X38_CK	X38_Cd	Dw	0.000261765	0.0121262	-7.2763
HORVU.MOREX.r2.6HG0521880	TCONS_00074269	tran	mRNA	X38_CK	X38_Cd	Dw	0.000262035	0.0121291	-0.577279
HORVU.MOREX.r2.7HG0567770	HORVU.MOREX.r2.7HG0567770.1	tran	mRNA	X38_CK	X38_Cd	Up	0.000262265	0.0121302	1.01455
HORVU.MOREX.r2.5HG0349990	HORVU.MOREX.r2.5HG0349990.1	tran	mRNA	X38_CK	X38_Cd	Dw	0.000263085	0.0121489	-0.895161
HORVU.MOREX.r2.6HG0498680	HORVU.MOREX.r2.6HG0498680.1	tran	mRNA	X38_CK	X38_Cd	Up	0.000263001	0.0121489	1.64431
HORVU.MOREX.r2.2HG0147240	TCONS_00023415	tran	mRNA	X38_CK	X38_Cd	Up	0.000265358	0.0122442	2.09431
HORVU.MOREX.r2.1HG0016580	HORVU.MOREX.r2.1HG0016580.1	tran	mRNA	X38_CK	X38_Cd	Up	0.000265663	0.0122487	6.94793
XLOC_002869	TCONS_00003953	tran	mRNA	X38_CK	X38_Cd	Dw	0.000266265	0.0122668	-0.591033
HORVU.MOREX.r2.5HG0361640	TCONS_00050610	tran	mRNA	X38_CK	X38_Cd	Up	0.000266833	0.0122833	0.58611
HORVU.MOREX.r2.7HG0623730	TCONS_00081419	tran	mRNA	X38_CK	X38_Cd	Dw	0.000268175	0.0123354	-2.77257
XLOC_024091	TCONS_00034004	tran	lncRNA	X38_CK	X38_Cd	Dw	0.00026842	0.012337	-0.749742
HORVU.MOREX.r2.3HG0236550	HORVU.MOREX.r2.3HG0236550.1	tran	mRNA	X38_CK	X38_Cd	Dw	0.000269872	0.0123941	-0.658023
HORVU.MOREX.r2.5HG0397780	HORVU.MOREX.r2.5HG0397780.1	tran	mRNA	X38_CK	X38_Cd	Dw	0.00027121	0.0124323	-0.967766
HORVU.MOREX.r2.7HG0612390	HORVU.MOREX.r2.7HG0612390.1	tran	mRNA	X38_CK	X38_Cd	Up	0.000271022	0.0124323	0.896833
HORVU.MOREX.r2.UnG0629100	TCONS_00089661	tran	mRNA	X38_CK	X38_Cd	Dw	0.000271341	0.0124323	-2.25027
HORVU.MOREX.r2.5HG0430140	HORVU.MOREX.r2.5HG0430140.1	tran	mRNA	X38_CK	X38_Cd	Dw	0.00027217	0.0124605	-7.03986
HORVU.MOREX.r2.7HG0554860	TCONS_00076554	tran	mRNA	X38_CK	X38_Cd	Dw	0.00027496	0.0125687	-0.783533
HORVU.MOREX.r2.7HG0566210	HORVU.MOREX.r2.7HG0566210.1	tran	mRNA	X38_CK	X38_Cd	Up	0.000274925	0.0125687	2.42183
HORVU.MOREX.r2.5HG0364270	TCONS_00057668	tran	mRNA	X38_CK	X38_Cd	Up	0.000275451	0.0125813	0.702252
HORVU.MOREX.r2.7HG0587810	TCONS_00085714	tran	lncRNA	X38_CK	X38_Cd	Dw	0.000276319	0.0126111	-1.00037
HORVU.MOREX.r2.4HG0299040	TCONS_00040817	tran	lncRNA	X38_CK	X38_Cd	Up	0.000277421	0.0126516	1.86652
HORVU.MOREX.r2.1HG0002460	HORVU.MOREX.r2.1HG0002460.1	tran	mRNA	X38_CK	X38_Cd	Up	0.00027799	0.0126677	2.33979
HORVU.MOREX.r2.7HG0624110	TCONS_00088323	tran	lncRNA	X38_CK	X38_Cd	Dw	0.000278574	0.0126844	-1.45548
HORVU.MOREX.r2.2HG0160030	TCONS_00016925	tran	mRNA	X38_CK	X38_Cd	Dw	0.000279525	0.0127178	-0.902356
HORVU.MOREX.r2.7HG0591950	HORVU.MOREX.r2.7HG0591950.1	tran	mRNA	X38_CK	X38_Cd	Dw	0.00028106	0.0127778	-1.52063
HORVU.MOREX.r2.3HG0225000	HORVU.MOREX.r2.3HG0225000.1	tran	mRNA	X38_CK	X38_Cd	Up	0.000281753	0.0127994	1.90056
HORVU.MOREX.r2.3HG0237100	TCONS_00029730	tran	mRNA	X38_CK	X38_Cd	Up	0.000287318	0.0130421	1.31601
HORVU.MOREX.r2.7HG0619480	HORVU.MOREX.r2.7HG0619480.1	tran	mRNA	X38_CK	X38_Cd	Up	0.000287873	0.0130571	3.72615
HORVU.MOREX.r2.3HG0252430	HORVU.MOREX.r2.3HG0252430.1	tran	mRNA	X38_CK	X38_Cd	Up	0.000290374	0.0131514	1.64987
HORVU.MOREX.r2.7HG0593450	HORVU.MOREX.r2.7HG0593450.1	tran	mRNA	X38_CK	X38_Cd	Dw	0.0002904	0.0131514	-0.866911
HORVU.MOREX.r2.4HG0278310	TCONS_00039320	tran	mRNA	X38_CK	X38_Cd	Dw	0.000294212	0.0133053	-1.56978
HORVU.MOREX.r2.5HG0407280	TCONS_00053724	tran	mRNA	X38_CK	X38_Cd	Up	0.000294252	0.0133053	0.330622
HORVU.MOREX.r2.7HG0539040	TCONS_00075471	tran	mRNA	X38_CK	X38_Cd	Up	0.000294533	0.0133077	0.671079
XLOC_061439	TCONS_00086720	tran	lncRNA	X38_CK	X38_Cd	Dw	0.000295595	0.0133455	-0.975068
XLOC_011158	TCONS_00015803	tran	lncRNA	X38_CK	X38_Cd	Dw	0.00029674	0.0133869	-1.26389
HORVU.MOREX.r2.3HG0234810	TCONS_00029541	tran	mRNA	X38_CK	X38_Cd	Up	0.000297939	0.0134219	8.19085
HORVU.MOREX.r2.6HG0507050	HORVU.MOREX.r2.6HG0507050.1	tran	mRNA	X38_CK	X38_Cd	Up	0.000297974	0.0134219	1.2688
HORVU.MOREX.r2.2HG0124860	TCONS_00021840	tran	mRNA	X38_CK	X38_Cd	Up	0.000300306	0.0135165	0.796837
HORVU.MOREX.r2.6HG0461610	HORVU.MOREX.r2.6HG0461610.1	tran	mRNA	X38_CK	X38_Cd	Up	0.000300859	0.013531	0.606953
HORVU.MOREX.r2.1HG0062200	TCONS_00009989	tran	mRNA	X38_CK	X38_Cd	Up	0.000301623	0.013555	1.21979
HORVU.MOREX.r2.2HG0093420	TCONS_00019452	tran	lncRNA	X38_CK	X38_Cd	Up	0.000302616	0.0135892	0.806043
HORVU.MOREX.r2.4HG0344860	TCONS_00049369	tran	mRNA	X38_CK	X38_Cd	Up	0.000303755	0.0136299	0.597378
HORVU.MOREX.r2.5HG0427890	TCONS_00055142	tran	mRNA	X38_CK	X38_Cd	Up	0.000304283	0.0136432	0.434667
HORVU.MOREX.r2.1HG0011940	HORVU.MOREX.r2.1HG0011940.1	tran	mRNA	X38_CK	X38_Cd	Up	0.000305759	0.0136989	1.58372
HORVU.MOREX.r2.7HG0535730	HORVU.MOREX.r2.7HG0535730.1	tran	mRNA	X38_CK	X38_Cd	Up	0.000306111	0.0137042	0.673943
HORVU.MOREX.r2.4HG0287220	HORVU.MOREX.r2.4HG0287220.1	tran	mRNA	X38_CK	X38_Cd	Dw	0.000306594	0.0137154	-1.24592
HORVU.MOREX.r2.1HG0019270	HORVU.MOREX.r2.1HG0019270.1	tran	mRNA	X38_CK	X38_Cd	Up	0.000306947	0.0137207	0.593096
HORVU.MOREX.r2.4HG0291800	TCONS_00045536	tran	mRNA	X38_CK	X38_Cd	Dw	0.000307912	0.0137533	-1.56118
HORVU.MOREX.r2.2HG0101090	HORVU.MOREX.r2.2HG0101090.1	tran	mRNA	X38_CK	X38_Cd	Up	0.000311919	0.0138657	0.617041
HORVU.MOREX.r2.2HG0125390	HORVU.MOREX.r2.2HG0125390.1	tran	mRNA	X38_CK	X38_Cd	Dw	0.000310946	0.0138657	-1.56909
HORVU.MOREX.r2.2HG0149690	HORVU.MOREX.r2.2HG0149690.1	tran	mRNA	X38_CK	X38_Cd	Up	0.000310788	0.0138657	0.516867
HORVU.MOREX.r2.5HG0445890	TCONS_00063368	tran	mRNA	X38_CK	X38_Cd	Up	0.000311382	0.0138657	0.756569
HORVU.MOREX.r2.6HG0479730	HORVU.MOREX.r2.6HG0479730.1	tran	mRNA	X38_CK	X38_Cd	Dw	0.000311902	0.0138657	-0.504232
HORVU.MOREX.r2.7HG0566050	TCONS_00084191	tran	mRNA	X38_CK	X38_Cd	Up	0.000312051	0.0138657	1.18659
HORVU.MOREX.r2.7HG0599230	TCONS_00079765	tran	mRNA	X38_CK	X38_Cd	Up	0.000312084	0.0138657	1.83858
HORVU.MOREX.r2.7HG0545500	TCONS_00082841	tran	mRNA	X38_CK	X38_Cd	Up	0.000312805	0.0138873	0.640232
HORVU.MOREX.r2.7HG0611150	HORVU.MOREX.r2.7HG0611150.1	tran	mRNA	X38_CK	X38_Cd	Up	0.00031348	0.0139067	3.33061
HORVU.MOREX.r2.6HG0452100	HORVU.MOREX.r2.6HG0452100.1	tran	mRNA	X38_CK	X38_Cd	Up	0.000313823	0.0139114	1.90675
HORVU.MOREX.r2.2HG0177930	TCONS_00025461	tran	mRNA	X38_CK	X38_Cd	Up	0.000314381	0.0139171	0.849227
HORVU.MOREX.r2.3HG0264030	TCONS_00031594	tran	mRNA	X38_CK	X38_Cd	Dw	0.000314426	0.0139171	-1.09793
HORVU.MOREX.r2.6HG0494110	TCONS_00066901	tran	mRNA	X38_CK	X38_Cd	Up	0.000315204	0.013941	0.931058
HORVU.MOREX.r2.4HG0277990	HORVU.MOREX.r2.4HG0277990.1	tran	mRNA	X38_CK	X38_Cd	Up	0.000317677	0.0140398	1.31171
HORVU.MOREX.r2.2HG0146170	HORVU.MOREX.r2.2HG0146170.1	tran	mRNA	X38_CK	X38_Cd	Up	0.000319837	0.0141246	0.775403
HORVU.MOREX.r2.7HG0590820	TCONS_00085911	tran	lncRNA	X38_CK	X38_Cd	Dw	0.000321366	0.0141815	-0.809047
HORVU.MOREX.r2.3HG0258720	HORVU.MOREX.r2.3HG0258720.1	tran	mRNA	X38_CK	X38_Cd	Dw	0.000324167	0.0142943	-2.39593
HORVU.MOREX.r2.4HG0284540	TCONS_00039803	tran	mRNA	X38_CK	X38_Cd	Up	0.00032473	0.0142976	0.641862
HORVU.MOREX.r2.5HG0429860	HORVU.MOREX.r2.5HG0429860.1	tran	mRNA	X38_CK	X38_Cd	Dw	0.000324676	0.0142976	-1.29372
HORVU.MOREX.r2.5HG0381410	HORVU.MOREX.r2.5HG0381410.1	tran	mRNA	X38_CK	X38_Cd	Dw	0.000328447	0.0144504	-0.729632
HORVU.MOREX.r2.2HG0104740	TCONS_00020330	tran	mRNA	X38_CK	X38_Cd	Up	0.00033117	0.0145593	1.07943
HORVU.MOREX.r2.2HG0093000	HORVU.MOREX.r2.2HG0093000.1	tran	mRNA	X38_CK	X38_Cd	Up	0.000333132	0.0146346	0.791484
HORVU.MOREX.r2.4HG0337890	TCONS_00043680	tran	mRNA	X38_CK	X38_Cd	Dw	0.000333988	0.0146612	-1.87284
HORVU.MOREX.r2.6HG0463730	TCONS_00070233	tran	mRNA	X38_CK	X38_Cd	Up	0.000334748	0.0146836	1.3863
HORVU.MOREX.r2.7HG0583980	HORVU.MOREX.r2.7HG0583980.1	tran	mRNA	X38_CK	X38_Cd	Dw	0.00033699	0.0147709	-0.832031
HORVU.MOREX.r2.3HG0191310	HORVU.MOREX.r2.3HG0191310.1	tran	mRNA	X38_CK	X38_Cd	Up	0.000340402	0.0149093	0.45283
HORVU.MOREX.r2.4HG0292570	TCONS_00045604	tran	lncRNA	X38_CK	X38_Cd	Dw	0.000340914	0.0149206	-2.04859
HORVU.MOREX.r2.7HG0529770	HORVU.MOREX.r2.7HG0529770.1	tran	mRNA	X38_CK	X38_Cd	Up	0.000342243	0.0149676	6.72445
HORVU.MOREX.r2.7HG0603690	TCONS_00080100	tran	mRNA	X38_CK	X38_Cd	Up	0.000344749	0.0150659	1.97811
HORVU.MOREX.r2.1HG0007650	TCONS_00006112	tran	mRNA	X38_CK	X38_Cd	Up	0.000346385	0.0151262	1.179
HORVU.MOREX.r2.5HG0352150	TCONS_00056729	tran	mRNA	X38_CK	X38_Cd	Up	0.000347438	0.0151608	0.718451
HORVU.MOREX.r2.3HG0267340	TCONS_00031833	tran	lncRNA	X38_CK	X38_Cd	Dw	0.000348009	0.0151745	-0.974362
HORVU.MOREX.r2.3HG0244630	HORVU.MOREX.r2.3HG0244630.1	tran	mRNA	X38_CK	X38_Cd	Up	0.000352213	0.0153464	0.939213
HORVU.MOREX.r2.3HG0230650	HORVU.MOREX.r2.3HG0230650.1	tran	mRNA	X38_CK	X38_Cd	Up	0.000353089	0.0153731	6.76052
HORVU.MOREX.r2.1HG0063080	HORVU.MOREX.r2.1HG0063080.1	tran	mRNA	X38_CK	X38_Cd	Up	0.00035362	0.0153848	0.774223
XLOC_058859	TCONS_00083159	tran	lncRNA	X38_CK	X38_Cd	Dw	0.000357339	0.0155351	-0.734204
HORVU.MOREX.r2.2HG0144690	HORVU.MOREX.r2.2HG0144690.1	tran	mRNA	X38_CK	X38_Cd	Dw	0.000358412	0.0155702	-2.16204
HORVU.MOREX.r2.6HG0456520	TCONS_00064127	tran	mRNA	X38_CK	X38_Cd	Up	0.000359322	0.0155982	1.01633
HORVU.MOREX.r2.7HG0545910	TCONS_00075935	tran	mRNA	X38_CK	X38_Cd	Up	0.000361465	0.0156796	0.972598
HORVU.MOREX.r2.5HG0362960	HORVU.MOREX.r2.5HG0362960.1	tran	mRNA	X38_CK	X38_Cd	Up	0.000364073	0.0157811	1.38373
HORVU.MOREX.r2.6HG0521380	HORVU.MOREX.r2.6HG0521380.1	tran	mRNA	X38_CK	X38_Cd	Up	0.000365882	0.0158478	1.5275
HORVU.MOREX.r2.7HG0527580	TCONS_00081514	tran	mRNA	X38_CK	X38_Cd	Dw	0.000367008	0.0158848	-5.49188
XLOC_024885	TCONS_00035192	tran	lncRNA	X38_CK	X38_Cd	Dw	0.000367895	0.0159115	-1.04054
HORVU.MOREX.r2.4HG0329630	HORVU.MOREX.r2.4HG0329630.1	tran	mRNA	X38_CK	X38_Cd	Up	0.000370878	0.0160286	1.90635
HORVU.MOREX.r2.4HG0276320	TCONS_00044459	tran	mRNA	X38_CK	X38_Cd	Dw	0.000371866	0.0160559	-0.569912
HORVU.MOREX.r2.7HG0532790	HORVU.MOREX.r2.7HG0532790.1	tran	mRNA	X38_CK	X38_Cd	Up	0.000372056	0.0160559	0.560442
HORVU.MOREX.r2.4HG0295580	HORVU.MOREX.r2.4HG0295580.1	tran	mRNA	X38_CK	X38_Cd	Up	0.000374989	0.0161706	1.72965
HORVU.MOREX.r2.3HG0220810	TCONS_00028566	tran	mRNA	X38_CK	X38_Cd	Dw	0.000377202	0.016254	-1.65775
HORVU.MOREX.r2.3HG0209410	TCONS_00027716	tran	mRNA	X38_CK	X38_Cd	Up	0.000378519	0.0162988	1.71685
HORVU.MOREX.r2.3HG0267220	TCONS_00031818	tran	mRNA	X38_CK	X38_Cd	Up	0.000382486	0.0164575	0.656557
HORVU.MOREX.r2.4HG0348750	HORVU.MOREX.r2.4HG0348750.1	tran	mRNA	X38_CK	X38_Cd	Up	0.000383113	0.0164725	1.60255
XLOC_021194	TCONS_00029966	tran	lncRNA	X38_CK	X38_Cd	Dw	0.000388063	0.0166731	-1.40341
HORVU.MOREX.r2.6HG0515700	TCONS_00073830	tran	mRNA	X38_CK	X38_Cd	Up	0.000393621	0.0168995	1.02462
HORVU.MOREX.r2.1HG0036040	HORVU.MOREX.r2.1HG0036040.1	tran	mRNA	X38_CK	X38_Cd	Up	0.000395762	0.0169742	1.7852
HORVU.MOREX.r2.3HG0229290	TCONS_00029146	tran	mRNA	X38_CK	X38_Cd	Up	0.000395941	0.0169742	0.771827
HORVU.MOREX.r2.5HG0399800	HORVU.MOREX.r2.5HG0399800.1	tran	mRNA	X38_CK	X38_Cd	Up	0.000397417	0.0170153	3.40443
HORVU.MOREX.r2.5HG0425520	HORVU.MOREX.r2.5HG0425520.1	tran	mRNA	X38_CK	X38_Cd	Up	0.00039748	0.0170153	1.11235
HORVU.MOREX.r2.6HG0448090	TCONS_00069155	tran	mRNA	X38_CK	X38_Cd	Dw	0.000398538	0.0170482	-4.75773
HORVU.MOREX.r2.7HG0620750	TCONS_00081206	tran	mRNA	X38_CK	X38_Cd	Up	0.000399256	0.0170665	0.573834
HORVU.MOREX.r2.1HG0077500	TCONS_00011061	tran	mRNA	X38_CK	X38_Cd	Up	0.000400734	0.0171047	0.849227
HORVU.MOREX.r2.2HG0105930	HORVU.MOREX.r2.2HG0105930.1	tran	mRNA	X38_CK	X38_Cd	Up	0.000400617	0.0171047	0.538801
HORVU.MOREX.r2.7HG0528920	HORVU.MOREX.r2.7HG0528920.1	tran	mRNA	X38_CK	X38_Cd	Up	0.000401993	0.017146	0.840197
HORVU.MOREX.r2.3HG0257760	HORVU.MOREX.r2.3HG0257760.1	tran	mRNA	X38_CK	X38_Cd	Up	0.000404807	0.0172534	0.548467
XLOC_004459	TCONS_00006166	tran	lncRNA	X38_CK	X38_Cd	Dw	0.000409856	0.0174559	-0.946383
HORVU.MOREX.r2.2HG0097500	TCONS_00019750	tran	mRNA	X38_CK	X38_Cd	Up	0.000412083	0.0175253	0.505882
HORVU.MOREX.r2.2HG0101820	HORVU.MOREX.r2.2HG0101820.1	tran	mRNA	X38_CK	X38_Cd	Up	0.00041189	0.0175253	0.433226
HORVU.MOREX.r2.6HG0449100	HORVU.MOREX.r2.6HG0449100.1	tran	lncRNA	X38_CK	X38_Cd	Dw	0.000412847	0.0175451	-1.43583
HORVU.MOREX.r2.3HG0250850	HORVU.MOREX.r2.3HG0250850.1	tran	mRNA	X38_CK	X38_Cd	Dw	0.000413592	0.0175641	-1.33985
HORVU.MOREX.r2.6HG0512970	TCONS_00073664	tran	mRNA	X38_CK	X38_Cd	Up	0.000414099	0.0175728	0.829067
HORVU.MOREX.r2.6HG0479710	TCONS_00065833	tran	mRNA	X38_CK	X38_Cd	Dw	0.000415381	0.0176145	-1.19544
HORVU.MOREX.r2.4HG0316000	TCONS_00047392	tran	mRNA	X38_CK	X38_Cd	Dw	0.00041573	0.0176166	-1.38346
HORVU.MOREX.r2.7HG0579980	TCONS_00078438	tran	mRNA	X38_CK	X38_Cd	Up	0.000416903	0.0176535	0.955472
HORVU.MOREX.r2.3HG0255840	TCONS_00037765	tran	mRNA	X38_CK	X38_Cd	Dw	0.000418751	0.0177181	-1.20165
HORVU.MOREX.r2.6HG0512270	TCONS_00073610	tran	mRNA	X38_CK	X38_Cd	Up	0.000419033	0.0177181	2.33103
HORVU.MOREX.r2.3HG0226600	TCONS_00035649	tran	mRNA	X38_CK	X38_Cd	Up	0.000421209	0.0177973	0.736845
HORVU.MOREX.r2.3HG0199680	HORVU.MOREX.r2.3HG0199680.1	tran	mRNA	X38_CK	X38_Cd	Up	0.000421561	0.0177993	2.01147
HORVU.MOREX.r2.2HG0107630	TCONS_00013128	tran	lncRNA	X38_CK	X38_Cd	Up	0.000424091	0.0178933	0.760822
HORVU.MOREX.r2.3HG0223460	HORVU.MOREX.r2.3HG0223460.1	tran	mRNA	X38_CK	X38_Cd	Up	0.000428334	0.0180593	1.36985
HORVU.MOREX.r2.3HG0274770	HORVU.MOREX.r2.3HG0274770.1	tran	mRNA	X38_CK	X38_Cd	Dw	0.00043098	0.0181448	-0.788656
HORVU.MOREX.r2.5HG0379750	TCONS_00051898	tran	mRNA	X38_CK	X38_Cd	Dw	0.00043098	0.0181448	-1.41942
HORVU.MOREX.r2.3HG0198580	TCONS_00033529	tran	mRNA	X38_CK	X38_Cd	Up	0.00043387	0.0182534	0.881525
HORVU.MOREX.r2.3HG0203920	TCONS_00033894	tran	mRNA	X38_CK	X38_Cd	Dw	0.000436488	0.0183327	-2.38437
HORVU.MOREX.r2.4HG0305430	TCONS_00041260	tran	mRNA	X38_CK	X38_Cd	Up	0.000436261	0.0183327	2.81073
HORVU.MOREX.r2.5HG0408770	HORVU.MOREX.r2.5HG0408770.1	tran	mRNA	X38_CK	X38_Cd	Up	0.000436991	0.0183327	0.881746
HORVU.MOREX.r2.7HG0547140	HORVU.MOREX.r2.7HG0547140.1	tran	mRNA	X38_CK	X38_Cd	Dw	0.000437006	0.0183327	-0.53351
XLOC_063349	TCONS_00089347	tran	lncRNA	X38_CK	X38_Cd	Dw	0.000437359	0.0183344	-1.73487
HORVU.MOREX.r2.1HG0035910	HORVU.MOREX.r2.1HG0035910.1	tran	mRNA	X38_CK	X38_Cd	Dw	0.000439421	0.0184077	-1.11737
HORVU.MOREX.r2.6HG0498790	TCONS_00067206	tran	mRNA	X38_CK	X38_Cd	Up	0.000440031	0.01842	1.1291
HORVU.MOREX.r2.3HG0254990	TCONS_00030950	tran	mRNA	X38_CK	X38_Cd	Up	0.000442608	0.0185147	0.917088
HORVU.MOREX.r2.1HG0020990	HORVU.MOREX.r2.1HG0020990.1	tran	mRNA	X38_CK	X38_Cd	Dw	0.000444396	0.0185762	-0.808258
HORVU.MOREX.r2.2HG0133360	TCONS_00022421	tran	mRNA	X38_CK	X38_Cd	Dw	0.000445423	0.0185899	-0.870694
HORVU.MOREX.r2.4HG0289460	HORVU.MOREX.r2.4HG0289460.1	tran	mRNA	X38_CK	X38_Cd	Up	0.000445492	0.0185899	1.71759
HORVU.MOREX.r2.6HG0466620	HORVU.MOREX.r2.6HG0466620.1	tran	mRNA	X38_CK	X38_Cd	Dw	0.000445674	0.0185899	-2.10769
HORVU.MOREX.r2.4HG0316550	HORVU.MOREX.r2.4HG0316550.1	tran	mRNA	X38_CK	X38_Cd	Dw	0.000448656	0.018701	-5.40037
HORVU.MOREX.r2.2HG0081060	HORVU.MOREX.r2.2HG0081060.1	tran	mRNA	X38_CK	X38_Cd	Up	0.000451558	0.0188086	0.83383
HORVU.MOREX.r2.6HG0476120	HORVU.MOREX.r2.6HG0476120.1	tran	mRNA	X38_CK	X38_Cd	Up	0.000451942	0.0188113	1.94067
HORVU.MOREX.r2.7HG0539310	HORVU.MOREX.r2.7HG0539310.1	tran	mRNA	X38_CK	X38_Cd	Up	0.000454219	0.0188926	3.08471
HORVU.MOREX.r2.6HG0522190	HORVU.MOREX.r2.6HG0522190.1	tran	mRNA	X38_CK	X38_Cd	Up	0.000455943	0.0189509	1.36298
HORVU.MOREX.r2.5HG0355230	TCONS_00050128	tran	mRNA	X38_CK	X38_Cd	Up	0.000457884	0.0190181	0.840694
HORVU.MOREX.r2.UnG0627430	TCONS_00089484	tran	mRNA	X38_CK	X38_Cd	Dw	0.000458284	0.0190212	-2.76104
HORVU.MOREX.r2.3HG0272780	TCONS_00038868	tran	mRNA	X38_CK	X38_Cd	Dw	0.000458759	0.0190275	-0.853785
HORVU.MOREX.r2.5HG0404190	HORVU.MOREX.r2.5HG0404190.1	tran	mRNA	X38_CK	X38_Cd	Up	0.000460965	0.0191054	1.19186
HORVU.MOREX.r2.2HG0091260	HORVU.MOREX.r2.2HG0091260.1	tran	mRNA	X38_CK	X38_Cd	Up	0.000461906	0.0191309	4.02996
HORVU.MOREX.r2.7HG0577330	TCONS_00084974	tran	lncRNA	X38_CK	X38_Cd	Dw	0.000463585	0.0191869	-6.94289
HORVU.MOREX.r2.1HG0065640	TCONS_00010223	tran	mRNA	X38_CK	X38_Cd	Dw	0.000467073	0.0193017	-8.19085
HORVU.MOREX.r2.2HG0108860	TCONS_00020594	tran	mRNA	X38_CK	X38_Cd	Dw	0.000466776	0.0193017	-6.42132
HORVU.MOREX.r2.4HG0320470	HORVU.MOREX.r2.4HG0320470.1	tran	mRNA	X38_CK	X38_Cd	Dw	0.000467345	0.0193017	-0.630169
HORVU.MOREX.r2.3HG0273870	TCONS_00032276	tran	mRNA	X38_CK	X38_Cd	Dw	0.000468857	0.0193505	-0.958215
HORVU.MOREX.r2.6HG0520670	HORVU.MOREX.r2.6HG0520670.1	tran	mRNA	X38_CK	X38_Cd	Dw	0.000471109	0.0194298	-7.08209
HORVU.MOREX.r2.2HG0106030	TCONS_00020415	tran	mRNA	X38_CK	X38_Cd	Up	0.000473021	0.0194796	6.40786
HORVU.MOREX.r2.2HG0148280	TCONS_00016099	tran	mRNA	X38_CK	X38_Cd	Up	0.000473285	0.0194796	7.31824
HORVU.MOREX.r2.3HG0185440	HORVU.MOREX.r2.3HG0185440.1	tran	mRNA	X38_CK	X38_Cd	Up	0.000473314	0.0194796	1.7566
HORVU.MOREX.r2.2HG0139980	HORVU.MOREX.r2.2HG0139980.1	tran	mRNA	X38_CK	X38_Cd	Dw	0.000473901	0.0194901	-1.322
HORVU.MOREX.r2.1HG0068200	TCONS_00010392	tran	mRNA	X38_CK	X38_Cd	Up	0.00047662	0.0195744	1.86059
HORVU.MOREX.r2.7HG0571990	HORVU.MOREX.r2.7HG0571990.1	tran	mRNA	X38_CK	X38_Cd	Up	0.000476488	0.0195744	1.01288
HORVU.MOREX.r2.4HG0325660	TCONS_00048004	tran	mRNA	X38_CK	X38_Cd	Up	0.000478898	0.0196542	0.534773
HORVU.MOREX.r2.5HG0421480	TCONS_00054674	tran	mRNA	X38_CK	X38_Cd	Dw	0.000479544	0.019667	-1.39296
HORVU.MOREX.r2.5HG0396840	HORVU.MOREX.r2.5HG0396840.1	tran	mRNA	X38_CK	X38_Cd	Up	0.000481315	0.0197258	1.33345
HORVU.MOREX.r2.4HG0327440	TCONS_00048127	tran	mRNA	X38_CK	X38_Cd	Up	0.000485295	0.0198751	0.537426
HORVU.MOREX.r2.1HG0060010	TCONS_00009850	tran	mRNA	X38_CK	X38_Cd	Up	0.000493073	0.0201795	0.60638
HORVU.MOREX.r2.5HG0398480	HORVU.MOREX.r2.5HG0398480.1	tran	mRNA	X38_CK	X38_Cd	Up	0.000493599	0.0201869	1.06239
HORVU.MOREX.r2.1HG0032520	HORVU.MOREX.r2.1HG0032520.1	tran	mRNA	X38_CK	X38_Cd	Up	0.000493993	0.020189	0.803525
HORVU.MOREX.r2.2HG0161230	HORVU.MOREX.r2.2HG0161230.1	tran	mRNA	X38_CK	X38_Cd	Dw	0.000495659	0.020243	-0.803784
HORVU.MOREX.r2.1HG0077030	HORVU.MOREX.r2.1HG0077030.1	tran	mRNA	X38_CK	X38_Cd	Up	0.000497079	0.0202728	0.901227
HORVU.MOREX.r2.2HG0097900	TCONS_00012482	tran	mRNA	X38_CK	X38_Cd	Up	0.00049688	0.0202728	1.14972
HORVU.MOREX.r2.7HG0548620	TCONS_00076120	tran	mRNA	X38_CK	X38_Cd	Up	0.000499143	0.0203428	0.442049
HORVU.MOREX.r2.2HG0098070	HORVU.MOREX.r2.2HG0098070.1	tran	mRNA	X38_CK	X38_Cd	Up	0.000501159	0.0204107	0.855861
HORVU.MOREX.r2.4HG0335800	TCONS_00043494	tran	mRNA	X38_CK	X38_Cd	Up	0.000505141	0.0205473	7.11244
HORVU.MOREX.r2.7HG0621050	HORVU.MOREX.r2.7HG0621050.1	tran	mRNA	X38_CK	X38_Cd	Dw	0.000505214	0.0205473	-1.82377
HORVU.MOREX.r2.4HG0313920	TCONS_00047229	tran	mRNA	X38_CK	X38_Cd	Up	0.000508174	0.0206534	1.35045
HORVU.MOREX.r2.4HG0279240	HORVU.MOREX.r2.4HG0279240.1	tran	mRNA	X38_CK	X38_Cd	Up	0.000511075	0.0207569	0.576375
HORVU.MOREX.r2.2HG0161570	HORVU.MOREX.r2.2HG0161570.1	tran	mRNA	X38_CK	X38_Cd	Up	0.000513397	0.0208224	0.535207
HORVU.MOREX.r2.7HG0553030	TCONS_00076404	tran	mRNA	X38_CK	X38_Cd	Up	0.000513385	0.0208224	0.598425
HORVU.MOREX.r2.1HG0049580	TCONS_00009127	tran	mRNA	X38_CK	X38_Cd	Up	0.000514064	0.0208351	1.10108
HORVU.MOREX.r2.7HG0592630	HORVU.MOREX.r2.7HG0592630.1	tran	mRNA	X38_CK	X38_Cd	Dw	0.000515795	0.0208908	-1.39424
HORVU.MOREX.r2.2HG0117410	TCONS_00013822	tran	mRNA	X38_CK	X38_Cd	Dw	0.000516941	0.0209083	-2.38005
HORVU.MOREX.r2.6HG0470280	HORVU.MOREX.r2.6HG0470280.1	tran	mRNA	X38_CK	X38_Cd	Up	0.000516695	0.0209083	1.28778
HORVU.MOREX.r2.2HG0116320	HORVU.MOREX.r2.2HG0116320.1	tran	mRNA	X38_CK	X38_Cd	Up	0.000517656	0.0209084	1.36809
HORVU.MOREX.r2.5HG0399880	HORVU.MOREX.r2.5HG0399880.1	tran	mRNA	X38_CK	X38_Cd	Dw	0.000517398	0.0209084	-0.69755
HORVU.MOREX.r2.4HG0289270	TCONS_00045359	tran	mRNA	X38_CK	X38_Cd	Up	0.000520053	0.0209907	1.22614
HORVU.MOREX.r2.2HG0167330	HORVU.MOREX.r2.2HG0167330.1	tran	mRNA	X38_CK	X38_Cd	Up	0.000521765	0.0210453	0.970829
HORVU.MOREX.r2.4HG0316920	HORVU.MOREX.r2.4HG0316920.1	tran	mRNA	X38_CK	X38_Cd	Up	0.000524269	0.0211136	1.05108
HORVU.MOREX.r2.7HG0544640	HORVU.MOREX.r2.7HG0544640.1	tran	mRNA	X38_CK	X38_Cd	Up	0.000523986	0.0211136	1.30507
HORVU.MOREX.r2.7HG0620180	TCONS_00088025	tran	mRNA	X38_CK	X38_Cd	Dw	0.000524536	0.0211136	-0.701243
HORVU.MOREX.r2.3HG0256080	HORVU.MOREX.r2.3HG0256080.1	tran	mRNA	X38_CK	X38_Cd	Dw	0.000525367	0.0211325	-0.70296
HORVU.MOREX.r2.1HG0060430	TCONS_00009885	tran	mRNA	X38_CK	X38_Cd	Dw	0.000530072	0.0213071	-1.01408
HORVU.MOREX.r2.2HG0120560	TCONS_00014053	tran	mRNA	X38_CK	X38_Cd	Dw	0.000531178	0.021337	-0.532871
HORVU.MOREX.r2.5HG0417850	HORVU.MOREX.r2.5HG0417850.1	tran	mRNA	X38_CK	X38_Cd	Up	0.000532138	0.0213609	0.706801
HORVU.MOREX.r2.3HG0265690	TCONS_00031710	tran	mRNA	X38_CK	X38_Cd	Up	0.000533418	0.0213976	1.25947
HORVU.MOREX.r2.2HG0097960	TCONS_00012501	tran	mRNA	X38_CK	X38_Cd	Up	0.000534754	0.0214225	0.702982
HORVU.MOREX.r2.2HG0160740	HORVU.MOREX.r2.2HG0160740.1	tran	mRNA	X38_CK	X38_Cd	Dw	0.000534767	0.0214225	-1.34819
HORVU.MOREX.r2.2HG0152490	HORVU.MOREX.r2.2HG0152490.1	tran	mRNA	X38_CK	X38_Cd	Dw	0.000537694	0.0215109	-1.40128
HORVU.MOREX.r2.6HG0453570	HORVU.MOREX.r2.6HG0453570.1	tran	mRNA	X38_CK	X38_Cd	Up	0.000537707	0.0215109	0.847369
HORVU.MOREX.r2.6HG0454610	TCONS_00063972	tran	mRNA	X38_CK	X38_Cd	Dw	0.000542053	0.0216699	-2.34759
XLOC_015352	TCONS_00021690	tran	lncRNA	X38_CK	X38_Cd	Dw	0.000543172	0.0216999	-0.773303
HORVU.MOREX.r2.5HG0410300	HORVU.MOREX.r2.5HG0410300.1	tran	mRNA	X38_CK	X38_Cd	Up	0.000544724	0.0217471	0.601343
HORVU.MOREX.r2.7HG0605080	TCONS_00080190	tran	mRNA	X38_CK	X38_Cd	Dw	0.000546959	0.0218214	-0.838091
HORVU.MOREX.r2.5HG0417740	HORVU.MOREX.r2.5HG0417740.1	tran	mRNA	X38_CK	X38_Cd	Dw	0.000548077	0.0218512	-3.27119
HORVU.MOREX.r2.3HG0187070	TCONS_00032772	tran	mRNA	X38_CK	X38_Cd	Dw	0.000550644	0.0219386	-1.65074
HORVU.MOREX.r2.2HG0153720	HORVU.MOREX.r2.2HG0153720.1	tran	mRNA	X38_CK	X38_Cd	Up	0.000554497	0.0220754	1.21692
XLOC_062898	TCONS_00088811	tran	lncRNA	X38_CK	X38_Cd	Dw	0.00055483	0.0220754	-1.07973
HORVU.MOREX.r2.7HG0554170	HORVU.MOREX.r2.7HG0554170.1	tran	mRNA	X38_CK	X38_Cd	Up	0.000558111	0.0221909	0.571579
HORVU.MOREX.r2.7HG0527390	HORVU.MOREX.r2.7HG0527390.1	tran	mRNA	X38_CK	X38_Cd	Up	0.000561165	0.0222972	0.703059
HORVU.MOREX.r2.4HG0286990	HORVU.MOREX.r2.4HG0286990.1	tran	mRNA	X38_CK	X38_Cd	Up	0.000562728	0.0223441	6.45436
HORVU.MOREX.r2.7HG0545650	TCONS_00082859	tran	mRNA	X38_CK	X38_Cd	Dw	0.00056361	0.022364	-6.96839
HORVU.MOREX.r2.7HG0619630	HORVU.MOREX.r2.7HG0619630.1	tran	mRNA	X38_CK	X38_Cd	Up	0.000567993	0.0225227	2.29193
HORVU.MOREX.r2.2HG0142630	TCONS_00015717	tran	mRNA	X38_CK	X38_Cd	Dw	0.000577118	0.0228536	-3.89153
HORVU.MOREX.r2.7HG0561340	HORVU.MOREX.r2.7HG0561340.1	tran	mRNA	X38_CK	X38_Cd	Dw	0.000576966	0.0228536	-0.81905
HORVU.MOREX.r2.3HG0228550	TCONS_00035779	tran	mRNA	X38_CK	X38_Cd	Dw	0.000580419	0.0228949	-0.905949
HORVU.MOREX.r2.3HG0238870	HORVU.MOREX.r2.3HG0238870.1	tran	mRNA	X38_CK	X38_Cd	Up	0.000579188	0.0228949	1.20012
HORVU.MOREX.r2.3HG0244170	TCONS_00030175	tran	mRNA	X38_CK	X38_Cd	Up	0.000580399	0.0228949	0.528757
HORVU.MOREX.r2.5HG0399170	HORVU.MOREX.r2.5HG0399170.1	tran	mRNA	X38_CK	X38_Cd	Up	0.000579884	0.0228949	1.73987
HORVU.MOREX.r2.5HG0419720	HORVU.MOREX.r2.5HG0419720.1	tran	mRNA	X38_CK	X38_Cd	Up	0.000580503	0.0228949	0.708528
HORVU.MOREX.r2.UnG0634740	TCONS_00090036	tran	lncRNA	X38_CK	X38_Cd	Dw	0.000578965	0.0228949	-0.947055
HORVU.MOREX.r2.7HG0621060	HORVU.MOREX.r2.7HG0621060.1	tran	mRNA	X38_CK	X38_Cd	Up	0.000582804	0.0229702	2.89968
HORVU.MOREX.r2.1HG0064610	TCONS_00004614	tran	lncRNA	X38_CK	X38_Cd	Dw	0.000584808	0.0230161	-0.90039
HORVU.MOREX.r2.4HG0279780	TCONS_00044708	tran	mRNA	X38_CK	X38_Cd	Up	0.000584648	0.0230161	0.383192
HORVU.MOREX.r2.7HG0622840	TCONS_00088204	tran	mRNA	X38_CK	X38_Cd	Dw	0.000585146	0.0230161	-1.24406
HORVU.MOREX.r2.4HG0326420	HORVU.MOREX.r2.4HG0326420.1	tran	mRNA	X38_CK	X38_Cd	Up	0.000585645	0.0230203	1.50663
HORVU.MOREX.r2.3HG0206040	HORVU.MOREX.r2.3HG0206040.1	tran	mRNA	X38_CK	X38_Cd	Up	0.000588756	0.0231155	1.10596
HORVU.MOREX.r2.5HG0372800	TCONS_00058270	tran	mRNA	X38_CK	X38_Cd	Up	0.000588855	0.0231155	0.764665
HORVU.MOREX.r2.7HG0607430	HORVU.MOREX.r2.7HG0607430.1	tran	mRNA	X38_CK	X38_Cd	Up	0.000589297	0.0231174	1.31547
HORVU.MOREX.r2.5HG0395310	TCONS_00059960	tran	mRNA	X38_CK	X38_Cd	Up	0.000589951	0.0231276	0.672587
HORVU.MOREX.r2.2HG0110730	HORVU.MOREX.r2.2HG0110730.1	tran	mRNA	X38_CK	X38_Cd	Up	0.00059511	0.0233062	0.788631
HORVU.MOREX.r2.3HG0206760	TCONS_00027542	tran	lncRNA	X38_CK	X38_Cd	Dw	0.000595701	0.0233062	-0.566222
HORVU.MOREX.r2.5HG0439240	TCONS_00062923	tran	mRNA	X38_CK	X38_Cd	Dw	0.000595467	0.0233062	-1.02075
HORVU.MOREX.r2.3HG0194580	TCONS_00026681	tran	mRNA	X38_CK	X38_Cd	Up	0.000597024	0.0233424	1.16525
HORVU.MOREX.r2.3HG0252930	TCONS_00030796	tran	mRNA	X38_CK	X38_Cd	Dw	0.000598323	0.0233776	-0.664555
HORVU.MOREX.r2.3HG0264030	TCONS_00031592	tran	mRNA	X38_CK	X38_Cd	Dw	0.000599563	0.0234105	-1.26146
HORVU.MOREX.r2.5HG0444570	TCONS_00063280	tran	mRNA	X38_CK	X38_Cd	Dw	0.000600564	0.023434	-1.33475
HORVU.MOREX.r2.1HG0076230	HORVU.MOREX.r2.1HG0076230.1	tran	mRNA	X38_CK	X38_Cd	Up	0.000601021	0.0234362	1.19263
XLOC_020348	TCONS_00028757	tran	lncRNA	X38_CK	X38_Cd	Dw	0.000601589	0.0234428	-1.98554
XLOC_004622	TCONS_00006395	tran	lncRNA	X38_CK	X38_Cd	Dw	0.000602891	0.0234779	-0.686575
HORVU.MOREX.r2.7HG0572390	TCONS_00084574	tran	mRNA	X38_CK	X38_Cd	Up	0.000606794	0.0236142	0.710439
HORVU.MOREX.r2.1HG0021040	HORVU.MOREX.r2.1HG0021040.1	tran	mRNA	X38_CK	X38_Cd	Up	0.000609986	0.0236913	4.62537
HORVU.MOREX.r2.4HG0332270	HORVU.MOREX.r2.4HG0332270.1	tran	mRNA	X38_CK	X38_Cd	Up	0.000609986	0.0236913	4.62537
HORVU.MOREX.r2.UnG0636330	HORVU.MOREX.r2.UnG0636330.1	tran	mRNA	X38_CK	X38_Cd	Up	0.000609986	0.0236913	4.62537
HORVU.MOREX.r2.2HG0080600	HORVU.MOREX.r2.2HG0080600.1	tran	mRNA	X38_CK	X38_Cd	Up	0.000614101	0.0238353	1.08816
HORVU.MOREX.r2.1HG0002210	HORVU.MOREX.r2.1HG0002210.1	tran	mRNA	X38_CK	X38_Cd	Up	0.000616763	0.0239228	0.832752
XLOC_041756	TCONS_00059108	tran	lncRNA	X38_CK	X38_Cd	Dw	0.000620624	0.0240567	-1.15153
HORVU.MOREX.r2.5HG0370120	HORVU.MOREX.r2.5HG0370120.1	tran	mRNA	X38_CK	X38_Cd	Up	0.00062202	0.0240948	0.5903
HORVU.MOREX.r2.2HG0153920	HORVU.MOREX.r2.2HG0153920.1	tran	mRNA	X38_CK	X38_Cd	Dw	0.000626378	0.0242319	-1.29237
HORVU.MOREX.r2.5HG0349990	TCONS_00056597	tran	mRNA	X38_CK	X38_Cd	Dw	0.000626384	0.0242319	-0.968579
HORVU.MOREX.r2.4HG0337890	HORVU.MOREX.r2.4HG0337890.1	tran	mRNA	X38_CK	X38_Cd	Dw	0.000629813	0.0243485	-1.49875
HORVU.MOREX.r2.3HG0253120	HORVU.MOREX.r2.3HG0253120.1	tran	mRNA	X38_CK	X38_Cd	Up	0.000634888	0.0245285	1.56862
HORVU.MOREX.r2.1HG0001510	HORVU.MOREX.r2.1HG0001510.1	tran	mRNA	X38_CK	X38_Cd	Dw	0.000635851	0.0245495	-2.63239
XLOC_044745	TCONS_00063298	tran	lncRNA	X38_CK	X38_Cd	Up	0.000638104	0.0246203	2.41572
HORVU.MOREX.r2.3HG0225110	HORVU.MOREX.r2.3HG0225110.1	tran	mRNA	X38_CK	X38_Cd	Up	0.000639963	0.0246758	1.10253
HORVU.MOREX.r2.3HG0186540	HORVU.MOREX.r2.3HG0186540.1	tran	mRNA	X38_CK	X38_Cd	Dw	0.000640733	0.0246776	-1.61864
HORVU.MOREX.r2.3HG0248780	HORVU.MOREX.r2.3HG0248780.1	tran	mRNA	X38_CK	X38_Cd	Up	0.00064085	0.0246776	0.768594
HORVU.MOREX.r2.5HG0429320	TCONS_00062309	tran	mRNA	X38_CK	X38_Cd	Up	0.000641691	0.0246938	1.03303
HORVU.MOREX.r2.2HG0138520	TCONS_00022778	tran	mRNA	X38_CK	X38_Cd	Dw	0.000642763	0.0247188	-2.68802
HORVU.MOREX.r2.1HG0078610	TCONS_00011130	tran	mRNA	X38_CK	X38_Cd	Up	0.000643597	0.0247346	0.523662
HORVU.MOREX.r2.1HG0019700	TCONS_00007011	tran	mRNA	X38_CK	X38_Cd	Up	0.000647393	0.0248642	0.745443
HORVU.MOREX.r2.7HG0602710	TCONS_00080040	tran	mRNA	X38_CK	X38_Cd	Up	0.000648263	0.0248813	0.543207
HORVU.MOREX.r2.4HG0331030	TCONS_00048376	tran	mRNA	X38_CK	X38_Cd	Up	0.00064956	0.0249148	0.630429
HORVU.MOREX.r2.3HG0254080	HORVU.MOREX.r2.3HG0254080.1	tran	mRNA	X38_CK	X38_Cd	Up	0.000650089	0.0249188	0.988882
HORVU.MOREX.r2.6HG0463280	TCONS_00070203	tran	mRNA	X38_CK	X38_Cd	Up	0.000652431	0.0249922	1.1526
XLOC_033518	TCONS_00047478	tran	lncRNA	X38_CK	X38_Cd	Dw	0.000653819	0.0250291	-1.07938
HORVU.MOREX.r2.1HG0021990	HORVU.MOREX.r2.1HG0021990.1	tran	mRNA	X38_CK	X38_Cd	Up	0.000656451	0.0251134	0.472058
HORVU.MOREX.r2.3HG0257820	HORVU.MOREX.r2.3HG0257820.1	tran	mRNA	X38_CK	X38_Cd	Dw	0.000656941	0.0251158	-1.11998
HORVU.MOREX.r2.4HG0281550	HORVU.MOREX.r2.4HG0281550.1	tran	mRNA	X38_CK	X38_Cd	Up	0.000667411	0.0254994	0.868292
HORVU.MOREX.r2.1HG0050980	TCONS_00003652	tran	mRNA	X38_CK	X38_Cd	Up	0.000668857	0.0255381	7.60669
HORVU.MOREX.r2.2HG0163430	HORVU.MOREX.r2.2HG0163430.1	tran	mRNA	X38_CK	X38_Cd	Dw	0.000669413	0.0255427	-2.63077
HORVU.MOREX.r2.7HG0596210	HORVU.MOREX.r2.7HG0596210.1	tran	mRNA	X38_CK	X38_Cd	Up	0.000672115	0.0256124	4.27992
XLOC_049501	TCONS_00069869	tran	lncRNA	X38_CK	X38_Cd	Dw	0.000671875	0.0256124	-5.52178
XLOC_023106	TCONS_00032661	tran	lncRNA	X38_CK	X38_Cd	Dw	0.000673866	0.0256625	-5.95398
HORVU.MOREX.r2.1HG0050170	HORVU.MOREX.r2.1HG0050170.1	tran	mRNA	X38_CK	X38_Cd	Up	0.000677382	0.0257797	1.0666
XLOC_048341	TCONS_00068268	tran	lncRNA	X38_CK	X38_Cd	Dw	0.000678306	0.025798	-0.854605
HORVU.MOREX.r2.7HG0541630	TCONS_00075633	tran	mRNA	X38_CK	X38_Cd	Dw	0.000679139	0.025813	-0.779883
HORVU.MOREX.r2.2HG0084730	HORVU.MOREX.r2.2HG0084730.1	tran	mRNA	X38_CK	X38_Cd	Dw	0.000681434	0.0258835	-2.80859
HORVU.MOREX.r2.UnG0632130	TCONS_00089884	tran	mRNA	X38_CK	X38_Cd	Dw	0.000687929	0.0261132	-1.24328
HORVU.MOREX.r2.7HG0533910	TCONS_00081987	tran	mRNA	X38_CK	X38_Cd	Dw	0.000691019	0.0262136	-1.54803
HORVU.MOREX.r2.2HG0162190	HORVU.MOREX.r2.2HG0162190.1	tran	mRNA	X38_CK	X38_Cd	Up	0.000697521	0.0264431	2.32551
HORVU.MOREX.r2.6HG0505510	HORVU.MOREX.r2.6HG0505510.1	tran	mRNA	X38_CK	X38_Cd	Up	0.000709872	0.026894	1.11235
HORVU.MOREX.r2.1HG0014010	HORVU.MOREX.r2.1HG0014010.1	tran	mRNA	X38_CK	X38_Cd	Up	0.000712257	0.0269669	0.836407
HORVU.MOREX.r2.1HG0062130	HORVU.MOREX.r2.1HG0062130.1	tran	mRNA	X38_CK	X38_Cd	Up	0.000717917	0.0271636	0.755899
HORVU.MOREX.r2.2HG0115530	TCONS_00013671	tran	mRNA	X38_CK	X38_Cd	Up	0.000721795	0.0272607	1.05812
HORVU.MOREX.r2.2HG0152510	TCONS_00023806	tran	mRNA	X38_CK	X38_Cd	Up	0.000720956	0.0272607	1.81215
HORVU.MOREX.r2.6HG0495590	HORVU.MOREX.r2.6HG0495590.1	tran	mRNA	X38_CK	X38_Cd	Dw	0.000721877	0.0272607	-9.83296
HORVU.MOREX.r2.2HG0083760	HORVU.MOREX.r2.2HG0083760.1	tran	mRNA	X38_CK	X38_Cd	Up	0.000723115	0.0272899	0.537606
HORVU.MOREX.r2.4HG0326440	TCONS_00048049	tran	mRNA	X38_CK	X38_Cd	Dw	0.000723865	0.0273007	-1.56583
HORVU.MOREX.r2.3HG0184480	HORVU.MOREX.r2.3HG0184480.1	tran	mRNA	X38_CK	X38_Cd	Dw	0.000725487	0.0273267	-1.01966
HORVU.MOREX.r2.5HG0417900	HORVU.MOREX.r2.5HG0417900.1	tran	mRNA	X38_CK	X38_Cd	Up	0.000725173	0.0273267	0.947403
HORVU.MOREX.r2.4HG0326980	TCONS_00042836	tran	mRNA	X38_CK	X38_Cd	Up	0.000726524	0.0273482	0.553696
HORVU.MOREX.r2.5HG0400900	TCONS_00060367	tran	mRNA	X38_CK	X38_Cd	Up	0.000728699	0.0274124	0.693637
HORVU.MOREX.r2.1HG0013150	HORVU.MOREX.r2.1HG0013150.1	tran	mRNA	X38_CK	X38_Cd	Up	0.000729983	0.0274432	2.89594
HORVU.MOREX.r2.7HG0569460	HORVU.MOREX.r2.7HG0569460.1	tran	mRNA	X38_CK	X38_Cd	Up	0.000731696	0.0274899	0.786394
HORVU.MOREX.r2.2HG0145920	HORVU.MOREX.r2.2HG0145920.1	tran	mRNA	X38_CK	X38_Cd	Up	0.000735185	0.0276033	6.35799
HORVU.MOREX.r2.1HG0045600	HORVU.MOREX.r2.1HG0045600.1	tran	mRNA	X38_CK	X38_Cd	Up	0.000741095	0.0278074	2.08542
HORVU.MOREX.r2.2HG0088540	HORVU.MOREX.r2.2HG0088540.1	tran	mRNA	X38_CK	X38_Cd	Up	0.000741931	0.027821	0.935999
HORVU.MOREX.r2.6HG0522930	TCONS_00068852	tran	mRNA	X38_CK	X38_Cd	Up	0.000748843	0.0280622	1.1148
HORVU.MOREX.r2.4HG0294300	HORVU.MOREX.r2.4HG0294300.1	tran	mRNA	X38_CK	X38_Cd	Dw	0.000749542	0.0280705	-1.53548
HORVU.MOREX.r2.5HG0447480	HORVU.MOREX.r2.5HG0447480.1	tran	mRNA	X38_CK	X38_Cd	Up	0.000750078	0.0280726	0.318092
HORVU.MOREX.r2.2HG0106310	TCONS_00020425	tran	lncRNA	X38_CK	X38_Cd	Up	0.000751901	0.0281229	6.25036
HORVU.MOREX.r2.5HG0392680	HORVU.MOREX.r2.5HG0392680.1	tran	mRNA	X38_CK	X38_Cd	Up	0.000758812	0.0283633	0.913314
HORVU.MOREX.r2.3HG0200070	HORVU.MOREX.r2.3HG0200070.1	tran	mRNA	X38_CK	X38_Cd	Dw	0.000760688	0.0283972	-1.11547
HORVU.MOREX.r2.3HG0231680	TCONS_00036017	tran	mRNA	X38_CK	X38_Cd	Up	0.000760342	0.0283972	0.544241
HORVU.MOREX.r2.2HG0083570	HORVU.MOREX.r2.2HG0083570.1	tran	mRNA	X38_CK	X38_Cd	Up	0.000762484	0.0284462	1.95433
HORVU.MOREX.r2.1HG0055760	HORVU.MOREX.r2.1HG0055760.1	tran	mRNA	X38_CK	X38_Cd	Up	0.000763612	0.0284521	0.571582
HORVU.MOREX.r2.6HG0450840	HORVU.MOREX.r2.6HG0450840.1	tran	mRNA	X38_CK	X38_Cd	Dw	0.000763222	0.0284521	-1.62483
HORVU.MOREX.r2.3HG0245730	TCONS_00030288	tran	mRNA	X38_CK	X38_Cd	Up	0.00076576	0.0284964	0.476142
HORVU.MOREX.r2.5HG0410360	TCONS_00061015	tran	mRNA	X38_CK	X38_Cd	Dw	0.000765773	0.0284964	-1.55999
HORVU.MOREX.r2.2HG0097170	TCONS_00019727	tran	mRNA	X38_CK	X38_Cd	Up	0.000766528	0.0284985	0.635043
HORVU.MOREX.r2.2HG0150540	HORVU.MOREX.r2.2HG0150540.1	tran	mRNA	X38_CK	X38_Cd	Up	0.000766802	0.0284985	1.02857
HORVU.MOREX.r2.7HG0531000	TCONS_00074933	tran	mRNA	X38_CK	X38_Cd	Up	0.000768044	0.0285266	0.575079
HORVU.MOREX.r2.1HG0011580	HORVU.MOREX.r2.1HG0011580.1	tran	mRNA	X38_CK	X38_Cd	Dw	0.000769895	0.0285756	-1.04146
HORVU.MOREX.r2.2HG0177930	TCONS_00025459	tran	mRNA	X38_CK	X38_Cd	Up	0.000770338	0.0285756	0.678333
HORVU.MOREX.r2.1HG0060430	TCONS_00009886	tran	mRNA	X38_CK	X38_Cd	Dw	0.000771329	0.0285762	-1.44766
HORVU.MOREX.r2.2HG0088520	HORVU.MOREX.r2.2HG0088520.1	tran	mRNA	X38_CK	X38_Cd	Up	0.000771297	0.0285762	3.10405
HORVU.MOREX.r2.3HG0199210	HORVU.MOREX.r2.3HG0199210.1	tran	mRNA	X38_CK	X38_Cd	Up	0.000774144	0.0286624	0.985402
HORVU.MOREX.r2.7HG0605000	HORVU.MOREX.r2.7HG0605000.1	tran	mRNA	X38_CK	X38_Cd	Up	0.000780027	0.028862	1.52338
HORVU.MOREX.r2.2HG0096750	HORVU.MOREX.r2.2HG0096750.1	tran	mRNA	X38_CK	X38_Cd	Up	0.000781345	0.0288743	0.92844
HORVU.MOREX.r2.6HG0475270	TCONS_00065483	tran	mRNA	X38_CK	X38_Cd	Up	0.000781306	0.0288743	0.530034
HORVU.MOREX.r2.3HG0188960	TCONS_00032893	tran	mRNA	X38_CK	X38_Cd	Dw	0.000788713	0.0291282	-1.13852
HORVU.MOREX.r2.2HG0143010	HORVU.MOREX.r2.2HG0143010.1	tran	mRNA	X38_CK	X38_Cd	Up	0.000789384	0.0291347	0.769075
HORVU.MOREX.r2.2HG0154950	HORVU.MOREX.r2.2HG0154950.1	tran	mRNA	X38_CK	X38_Cd	Dw	0.000791448	0.0291925	-0.591635
HORVU.MOREX.r2.2HG0087220	TCONS_00011818	tran	mRNA	X38_CK	X38_Cd	Up	0.000792272	0.0292045	1.29828
HORVU.MOREX.r2.2HG0150720	TCONS_00016242	tran	mRNA	X38_CK	X38_Cd	Up	0.00079459	0.0292715	0.760474
XLOC_006689	TCONS_00009438	tran	lncRNA	X38_CK	X38_Cd	Dw	0.000800095	0.0294558	-5.36102
HORVU.MOREX.r2.4HG0318370	HORVU.MOREX.r2.4HG0318370.1	tran	mRNA	X38_CK	X38_Cd	Up	0.000807727	0.0297182	1.08879
HORVU.MOREX.r2.6HG0516430	TCONS_00068422	tran	mRNA	X38_CK	X38_Cd	Up	0.000808933	0.0297252	0.639014
XLOC_057884	TCONS_00081774	tran	lncRNA	X38_CK	X38_Cd	Up	0.000808703	0.0297252	1.33809
HORVU.MOREX.r2.6HG0479710	TCONS_00065831	tran	mRNA	X38_CK	X38_Cd	Dw	0.000810249	0.029755	-0.895042
HORVU.MOREX.r2.2HG0105250	HORVU.MOREX.r2.2HG0105250.1	tran	mRNA	X38_CK	X38_Cd	Dw	0.000811503	0.0297823	-0.81774
HORVU.MOREX.r2.4HG0335810	HORVU.MOREX.r2.4HG0335810.1	tran	mRNA	X38_CK	X38_Cd	Up	0.000813373	0.0298303	1.28223
HORVU.MOREX.r2.7HG0618390	HORVU.MOREX.r2.7HG0618390.1	tran	mRNA	X38_CK	X38_Cd	Dw	0.000813826	0.0298303	-1.63267
XLOC_038340	TCONS_00054179	tran	lncRNA	X38_CK	X38_Cd	Dw	0.000817759	0.0299557	-1.05056
HORVU.MOREX.r2.2HG0140860	HORVU.MOREX.r2.2HG0140860.1	tran	mRNA	X38_CK	X38_Cd	Up	0.000819002	0.0299638	1.17051
HORVU.MOREX.r2.6HG0448090	TCONS_00069153	tran	mRNA	X38_CK	X38_Cd	Dw	0.000818507	0.0299638	-5.61692
HORVU.MOREX.r2.5HG0446020	HORVU.MOREX.r2.5HG0446020.1	tran	mRNA	X38_CK	X38_Cd	Dw	0.000819846	0.029976	-2.24184
HORVU.MOREX.r2.2HG0085150	TCONS_00011660	tran	mRNA	X38_CK	X38_Cd	Up	0.000824745	0.0301363	2.5942
HORVU.MOREX.r2.4HG0290870	TCONS_00045479	tran	mRNA	X38_CK	X38_Cd	Up	0.000827204	0.0302074	0.676995
HORVU.MOREX.r2.7HG0612510	TCONS_00087499	tran	mRNA	X38_CK	X38_Cd	Up	0.000830339	0.030303	0.890923
HORVU.MOREX.r2.2HG0147570	TCONS_00023445	tran	mRNA	X38_CK	X38_Cd	Up	0.000832306	0.0303559	0.660779
HORVU.MOREX.r2.1HG0061200	HORVU.MOREX.r2.1HG0061200.1	tran	mRNA	X38_CK	X38_Cd	Up	0.000835991	0.0304336	0.450818
HORVU.MOREX.r2.6HG0451510	TCONS_00063782	tran	mRNA	X38_CK	X38_Cd	Dw	0.000835993	0.0304336	-1.05772
HORVU.MOREX.r2.7HG0552490	TCONS_00083348	tran	lncRNA	X38_CK	X38_Cd	Dw	0.000835157	0.0304336	-3.89796
HORVU.MOREX.r2.2HG0104920	TCONS_00012937	tran	mRNA	X38_CK	X38_Cd	Dw	0.000841154	0.0306024	-0.518255
HORVU.MOREX.r2.4HG0286040	TCONS_00039923	tran	lncRNA	X38_CK	X38_Cd	Dw	0.000842139	0.0306075	-0.99607
HORVU.MOREX.r2.6HG0454630	TCONS_00063984	tran	mRNA	X38_CK	X38_Cd	Dw	0.000842336	0.0306075	-1.858
HORVU.MOREX.r2.4HG0321770	HORVU.MOREX.r2.4HG0321770.1	tran	mRNA	X38_CK	X38_Cd	Up	0.00084306	0.0306148	1.50326
HORVU.MOREX.r2.5HG0388990	TCONS_00052476	tran	mRNA	X38_CK	X38_Cd	Up	0.000848763	0.0308029	1.26252
HORVU.MOREX.r2.1HG0043610	TCONS_00008714	tran	mRNA	X38_CK	X38_Cd	Up	0.000852342	0.0308356	0.80051
HORVU.MOREX.r2.2HG0140850	TCONS_00022947	tran	mRNA	X38_CK	X38_Cd	Up	0.000852852	0.0308356	0.645748
HORVU.MOREX.r2.2HG0160120	TCONS_00016933	tran	mRNA	X38_CK	X38_Cd	Up	0.000851709	0.0308356	1.62674
HORVU.MOREX.r2.7HG0619470	HORVU.MOREX.r2.7HG0619470.1	tran	mRNA	X38_CK	X38_Cd	Up	0.000852088	0.0308356	1.77101
HORVU.MOREX.r2.7HG0622850	HORVU.MOREX.r2.7HG0622850.1	tran	mRNA	X38_CK	X38_Cd	Dw	0.000853347	0.0308356	-1.31593
XLOC_032733	TCONS_00046376	tran	mRNA	X38_CK	X38_Cd	Up	0.000851585	0.0308356	1.07379
XLOC_055641	TCONS_00078683	tran	lncRNA	X38_CK	X38_Cd	Dw	0.000852457	0.0308356	-2.81739
HORVU.MOREX.r2.4HG0327670	HORVU.MOREX.r2.4HG0327670.1	tran	mRNA	X38_CK	X38_Cd	Up	0.000856695	0.0309376	1.06227
HORVU.MOREX.r2.2HG0179050	HORVU.MOREX.r2.2HG0179050.1	tran	mRNA	X38_CK	X38_Cd	Dw	0.000858784	0.0309838	-2.9174
HORVU.MOREX.r2.5HG0428520	TCONS_00055185	tran	lncRNA	X38_CK	X38_Cd	Up	0.00085956	0.0309838	0.790197
XLOC_032142	TCONS_00045448	tran	lncRNA	X38_CK	X38_Cd	Dw	0.000859346	0.0309838	-4.42345
HORVU.MOREX.r2.2HG0140180	HORVU.MOREX.r2.2HG0140180.1	tran	mRNA	X38_CK	X38_Cd	Up	0.000860406	0.0309952	5.01906
HORVU.MOREX.r2.4HG0337180	TCONS_00048854	tran	mRNA	X38_CK	X38_Cd	Up	0.000865901	0.0311549	0.496505
HORVU.MOREX.r2.7HG0542080	HORVU.MOREX.r2.7HG0542080.1	tran	mRNA	X38_CK	X38_Cd	Up	0.000865486	0.0311549	1.39202
HORVU.MOREX.r2.5HG0437180	HORVU.MOREX.r2.5HG0437180.1	tran	mRNA	X38_CK	X38_Cd	Dw	0.000868612	0.0312333	-1.31479
HORVU.MOREX.r2.5HG0392520	HORVU.MOREX.r2.5HG0392520.1	tran	mRNA	X38_CK	X38_Cd	Dw	0.000871028	0.031301	-0.743361
HORVU.MOREX.r2.4HG0323920	HORVU.MOREX.r2.4HG0323920.1	tran	mRNA	X38_CK	X38_Cd	Up	0.00087201	0.0313171	6.2737
HORVU.MOREX.r2.2HG0145740	HORVU.MOREX.r2.2HG0145740.1	tran	mRNA	X38_CK	X38_Cd	Dw	0.000873214	0.031322	-1.14865
HORVU.MOREX.r2.5HG0387390	HORVU.MOREX.r2.5HG0387390.1	tran	mRNA	X38_CK	X38_Cd	Up	0.000873163	0.031322	0.675337
HORVU.MOREX.r2.3HG0257260	TCONS_00031104	tran	mRNA	X38_CK	X38_Cd	Dw	0.00087409	0.0313342	-1.15835
HORVU.MOREX.r2.5HG0410360	TCONS_00061018	tran	mRNA	X38_CK	X38_Cd	Dw	0.000876031	0.0313714	-1.2167
HORVU.MOREX.r2.7HG0622840	HORVU.MOREX.r2.7HG0622840.1	tran	mRNA	X38_CK	X38_Cd	Dw	0.000876199	0.0313714	-1.63214
HORVU.MOREX.r2.5HG0406860	HORVU.MOREX.r2.5HG0406860.1	tran	mRNA	X38_CK	X38_Cd	Up	0.000877703	0.0314061	0.574227
HORVU.MOREX.r2.6HG0518400	HORVU.MOREX.r2.6HG0518400.1	tran	mRNA	X38_CK	X38_Cd	Up	0.00088182	0.0315342	0.4033
HORVU.MOREX.r2.3HG0210890	HORVU.MOREX.r2.3HG0210890.1	tran	mRNA	X38_CK	X38_Cd	Up	0.000882682	0.0315458	1.92139
HORVU.MOREX.r2.7HG0573040	HORVU.MOREX.r2.7HG0573040.1	tran	mRNA	X38_CK	X38_Cd	Up	0.00088441	0.0315883	1.42578
HORVU.MOREX.r2.2HG0178910	TCONS_00025533	tran	mRNA	X38_CK	X38_Cd	Dw	0.000891366	0.0318087	-0.414906
HORVU.MOREX.r2.3HG0246330	TCONS_00030334	tran	mRNA	X38_CK	X38_Cd	Up	0.000891665	0.0318087	0.356265
HORVU.MOREX.r2.7HG0538750	HORVU.MOREX.r2.7HG0538750.1	tran	mRNA	X38_CK	X38_Cd	Up	0.00089534	0.0319204	1.383
HORVU.MOREX.r2.5HG0438530	HORVU.MOREX.r2.5HG0438530.1	tran	mRNA	X38_CK	X38_Cd	Dw	0.000899385	0.0320451	-0.958075
HORVU.MOREX.r2.2HG0160700	TCONS_00024302	tran	mRNA	X38_CK	X38_Cd	Up	0.000900933	0.0320808	1.36168
HORVU.MOREX.r2.4HG0330640	HORVU.MOREX.r2.4HG0330640.1	tran	mRNA	X38_CK	X38_Cd	Up	0.000912147	0.0324407	0.612174
HORVU.MOREX.r2.7HG0592440	TCONS_00079280	tran	mRNA	X38_CK	X38_Cd	Up	0.000911912	0.0324407	1.09074
HORVU.MOREX.r2.1HG0000030	HORVU.MOREX.r2.1HG0000030.1	tran	mRNA	X38_CK	X38_Cd	Dw	0.000916982	0.0325901	-1.40939
HORVU.MOREX.r2.1HG0071020	TCONS_00005043	tran	mRNA	X38_CK	X38_Cd	Up	0.000918491	0.0325901	0.508511
HORVU.MOREX.r2.5HG0367230	HORVU.MOREX.r2.5HG0367230.1	tran	mRNA	X38_CK	X38_Cd	Up	0.000919087	0.0325901	6.2942
HORVU.MOREX.r2.5HG0404770	TCONS_00060618	tran	mRNA	X38_CK	X38_Cd	Dw	0.000919128	0.0325901	-0.461607
HORVU.MOREX.r2.6HG0521070	HORVU.MOREX.r2.6HG0521070.1	tran	mRNA	X38_CK	X38_Cd	Dw	0.000917559	0.0325901	-3.98822
HORVU.MOREX.r2.2HG0107460	HORVU.MOREX.r2.2HG0107460.1	tran	mRNA	X38_CK	X38_Cd	Up	0.000921025	0.0326377	0.92448
XLOC_006678	TCONS_00009426	tran	lncRNA	X38_CK	X38_Cd	Dw	0.000922257	0.0326616	-0.793606
HORVU.MOREX.r2.4HG0279870	TCONS_00039444	tran	mRNA	X38_CK	X38_Cd	Up	0.000924598	0.032705	0.712436
HORVU.MOREX.r2.5HG0440830	TCONS_00063018	tran	mRNA	X38_CK	X38_Cd	Dw	0.000924376	0.032705	-6.99907
HORVU.MOREX.r2.2HG0083760	TCONS_00011560	tran	mRNA	X38_CK	X38_Cd	Up	0.000925919	0.032732	0.53818
HORVU.MOREX.r2.5HG0429640	HORVU.MOREX.r2.5HG0429640.1	tran	mRNA	X38_CK	X38_Cd	Up	0.0009277	0.0327752	0.854061
HORVU.MOREX.r2.3HG0257630	HORVU.MOREX.r2.3HG0257630.1	tran	mRNA	X38_CK	X38_Cd	Up	0.00093299	0.0329423	0.856212
HORVU.MOREX.r2.7HG0543790	HORVU.MOREX.r2.7HG0543790.1	tran	mRNA	X38_CK	X38_Cd	Up	0.000936045	0.0330302	1.09259
HORVU.MOREX.r2.7HG0559070	TCONS_00076833	tran	mRNA	X38_CK	X38_Cd	Dw	0.000937323	0.0330554	-1.57127
XLOC_061996	TCONS_00087503	tran	mRNA	X38_CK	X38_Cd	Up	0.000941695	0.0331897	0.93366
XLOC_032142	TCONS_00045449	tran	lncRNA	X38_CK	X38_Cd	Dw	0.000942415	0.0331951	-7.39486
XLOC_063816	TCONS_00089975	tran	lncRNA	X38_CK	X38_Cd	Dw	0.000944856	0.0332611	-0.956663
XLOC_035371	TCONS_00050077	tran	lncRNA	X38_CK	X38_Cd	Dw	0.000945988	0.033281	-0.67697
HORVU.MOREX.r2.3HG0262620	HORVU.MOREX.r2.3HG0262620.1	tran	mRNA	X38_CK	X38_Cd	Up	0.000947355	0.0333091	1.35064
HORVU.MOREX.r2.6HG0512040	HORVU.MOREX.r2.6HG0512040.1	tran	mRNA	X38_CK	X38_Cd	Up	0.000949396	0.0333608	1.49634
HORVU.MOREX.r2.7HG0599740	TCONS_00086572	tran	mRNA	X38_CK	X38_Cd	Dw	0.000955255	0.0335445	-0.715881
HORVU.MOREX.r2.7HG0610410	TCONS_00080533	tran	lncRNA	X38_CK	X38_Cd	Dw	0.000955768	0.0335445	-1.00961
HORVU.MOREX.r2.1HG0053540	TCONS_00009392	tran	mRNA	X38_CK	X38_Cd	Dw	0.000962556	0.0337424	-1.32275
HORVU.MOREX.r2.3HG0243010	HORVU.MOREX.r2.3HG0243010.1	tran	mRNA	X38_CK	X38_Cd	Up	0.000962051	0.0337424	0.894692
HORVU.MOREX.r2.7HG0619400	HORVU.MOREX.r2.7HG0619400.1	tran	mRNA	X38_CK	X38_Cd	Up	0.000964208	0.0337801	6.43815
HORVU.MOREX.r2.7HG0605560	HORVU.MOREX.r2.7HG0605560.1	tran	mRNA	X38_CK	X38_Cd	Dw	0.000965685	0.0338033	-1.65816
XLOC_061535	TCONS_00086857	tran	mRNA	X38_CK	X38_Cd	Dw	0.000966022	0.0338033	-1.31647
HORVU.MOREX.r2.7HG0579350	TCONS_00078395	tran	mRNA	X38_CK	X38_Cd	Dw	0.000966669	0.0338057	-7.03878
HORVU.MOREX.r2.7HG0620400	TCONS_00081173	tran	mRNA	X38_CK	X38_Cd	Up	0.000968669	0.0338555	6.81535
HORVU.MOREX.r2.1HG0000730	TCONS_00005590	tran	mRNA	X38_CK	X38_Cd	Up	0.000969885	0.0338778	1.1246
HORVU.MOREX.r2.3HG0241990	TCONS_00036766	tran	mRNA	X38_CK	X38_Cd	Up	0.000974345	0.0340133	0.728119
HORVU.MOREX.r2.3HG0246100	TCONS_00037044	tran	mRNA	X38_CK	X38_Cd	Up	0.000979909	0.0341872	0.738
HORVU.MOREX.r2.1HG0034470	HORVU.MOREX.r2.1HG0034470.1	tran	mRNA	X38_CK	X38_Cd	Dw	0.000983388	0.0342678	-0.865881
HORVU.MOREX.r2.3HG0247110	HORVU.MOREX.r2.3HG0247110.1	tran	mRNA	X38_CK	X38_Cd	Up	0.000983237	0.0342678	2.06724
HORVU.MOREX.r2.2HG0083410	HORVU.MOREX.r2.2HG0083410.1	tran	mRNA	X38_CK	X38_Cd	Up	0.000987706	0.0343775	1.56628
HORVU.MOREX.r2.5HG0408480	HORVU.MOREX.r2.5HG0408480.1	tran	mRNA	X38_CK	X38_Cd	Dw	0.000987525	0.0343775	-8.33733
HORVU.MOREX.r2.3HG0182140	HORVU.MOREX.r2.3HG0182140.1	tran	mRNA	X38_CK	X38_Cd	Dw	0.000996853	0.0346752	-0.877834
XLOC_063533	TCONS_00089626	tran	lncRNA	X38_CK	X38_Cd	Dw	0.00099887	0.0347248	-0.611996
HORVU.MOREX.r2.1HG0054360	HORVU.MOREX.r2.1HG0054360.1	tran	mRNA	X38_CK	X38_Cd	Up	0.00100026	0.0347527	0.601234
HORVU.MOREX.r2.2HG0161100	HORVU.MOREX.r2.2HG0161100.1	tran	lncRNA	X38_CK	X38_Cd	Up	0.00100374	0.0348478	1.68418
XLOC_060175	TCONS_00084929	tran	lncRNA	X38_CK	X38_Cd	Dw	0.00100419	0.0348478	-0.909142
HORVU.MOREX.r2.5HG0353240	TCONS_00056805	tran	mRNA	X38_CK	X38_Cd	Up	0.00101054	0.0350474	0.504175
XLOC_005286	TCONS_00007510	tran	lncRNA	X38_CK	X38_Cd	Dw	0.00101623	0.0352238	-1.49328
HORVU.MOREX.r2.UnG0631040	TCONS_00088840	tran	mRNA	X38_CK	X38_Cd	Dw	0.00102158	0.0353883	-4.75075
HORVU.MOREX.r2.6HG0495810	TCONS_00066996	tran	mRNA	X38_CK	X38_Cd	Up	0.00102361	0.0354359	0.930435
XLOC_038340	TCONS_00054180	tran	lncRNA	X38_CK	X38_Cd	Dw	0.00102416	0.0354359	-0.755486
HORVU.MOREX.r2.2HG0102780	TCONS_00020174	tran	lncRNA	X38_CK	X38_Cd	Up	0.00102557	0.0354637	6.47218
HORVU.MOREX.r2.2HG0174930	TCONS_00025238	tran	lncRNA	X38_CK	X38_Cd	Dw	0.0010268	0.0354856	-2.209
HORVU.MOREX.r2.2HG0169130	HORVU.MOREX.r2.2HG0169130.1	tran	mRNA	X38_CK	X38_Cd	Up	0.00102834	0.0354969	0.384532
HORVU.MOREX.r2.3HG0237420	TCONS_00029756	tran	mRNA	X38_CK	X38_Cd	Up	0.00102783	0.0354969	0.573157
HORVU.MOREX.r2.3HG0195590	HORVU.MOREX.r2.3HG0195590.1	tran	mRNA	X38_CK	X38_Cd	Up	0.0010365	0.0357574	1.21982
HORVU.MOREX.r2.2HG0105280	TCONS_00012956	tran	mRNA	X38_CK	X38_Cd	Up	0.00104589	0.03606	0.884669
XLOC_051830	TCONS_00073250	tran	lncRNA	X38_CK	X38_Cd	Dw	0.00104691	0.0360741	-2.02932
HORVU.MOREX.r2.7HG0596640	HORVU.MOREX.r2.7HG0596640.1	tran	mRNA	X38_CK	X38_Cd	Dw	0.00104938	0.0361378	-0.732278
HORVU.MOREX.r2.2HG0094920	TCONS_00019560	tran	mRNA	X38_CK	X38_Cd	Up	0.00105168	0.0361747	0.68185
HORVU.MOREX.r2.6HG0455190	HORVU.MOREX.r2.6HG0455190.1	tran	mRNA	X38_CK	X38_Cd	Up	0.00105159	0.0361747	1.92458
HORVU.MOREX.r2.5HG0370480	HORVU.MOREX.r2.5HG0370480.1	tran	mRNA	X38_CK	X38_Cd	Dw	0.00105244	0.0361796	-0.950058
HORVU.MOREX.r2.3HG0252990	TCONS_00037569	tran	mRNA	X38_CK	X38_Cd	Up	0.00105388	0.0362078	0.505338
HORVU.MOREX.r2.7HG0542180	HORVU.MOREX.r2.7HG0542180.1	tran	mRNA	X38_CK	X38_Cd	Up	0.0010553	0.0362355	1.25473
HORVU.MOREX.r2.5HG0414030	HORVU.MOREX.r2.5HG0414030.1	tran	mRNA	X38_CK	X38_Cd	Up	0.00105633	0.0362495	0.464407
HORVU.MOREX.r2.3HG0203330	TCONS_00033856	tran	mRNA	X38_CK	X38_Cd	Up	0.0010604	0.0363682	0.689581
HORVU.MOREX.r2.2HG0099600	HORVU.MOREX.r2.2HG0099600.1	tran	mRNA	X38_CK	X38_Cd	Up	0.00106173	0.0363924	1.29394
HORVU.MOREX.r2.5HG0385670	TCONS_00052274	tran	mRNA	X38_CK	X38_Cd	Up	0.00106303	0.0364157	0.965595
HORVU.MOREX.r2.7HG0532730	HORVU.MOREX.r2.7HG0532730.1	tran	mRNA	X38_CK	X38_Cd	Up	0.00106636	0.0365083	1.66558
HORVU.MOREX.r2.5HG0359500	TCONS_00050464	tran	mRNA	X38_CK	X38_Cd	Dw	0.00106922	0.0365848	-2.77907
HORVU.MOREX.r2.3HG0202450	TCONS_00027230	tran	mRNA	X38_CK	X38_Cd	Dw	0.00107989	0.0369284	-0.728683
XLOC_055069	TCONS_00077862	tran	lncRNA	X38_CK	X38_Cd	Up	0.00108409	0.0370506	0.559335
HORVU.MOREX.r2.3HG0201590	HORVU.MOREX.r2.3HG0201590.1	tran	mRNA	X38_CK	X38_Cd	Dw	0.00109275	0.0373247	-0.502952
HORVU.MOREX.r2.2HG0081840	TCONS_00011423	tran	mRNA	X38_CK	X38_Cd	Up	0.00109541	0.0373536	1.52884
HORVU.MOREX.r2.2HG0105970	TCONS_00020406	tran	lncRNA	X38_CK	X38_Cd	Dw	0.00109551	0.0373536	-3.87311
HORVU.MOREX.r2.2HG0141660	TCONS_00023013	tran	mRNA	X38_CK	X38_Cd	Up	0.00109541	0.0373536	0.709315
HORVU.MOREX.r2.5HG0407490	TCONS_00060787	tran	mRNA	X38_CK	X38_Cd	Up	0.00111633	0.0380196	1.07541
HORVU.MOREX.r2.6HG0449380	HORVU.MOREX.r2.6HG0449380.1	tran	mRNA	X38_CK	X38_Cd	Dw	0.00111622	0.0380196	-1.94599
HORVU.MOREX.r2.5HG0436200	TCONS_00062709	tran	mRNA	X38_CK	X38_Cd	Up	0.00111768	0.0380434	6.39014
HORVU.MOREX.r2.1HG0024240	TCONS_00007427	tran	mRNA	X38_CK	X38_Cd	Up	0.00111934	0.0380777	0.544759
HORVU.MOREX.r2.1HG0053540	TCONS_00009390	tran	mRNA	X38_CK	X38_Cd	Dw	0.00112025	0.0380865	-0.823688
XLOC_021029	TCONS_00029723	tran	lncRNA	X38_CK	X38_Cd	Dw	0.00112291	0.0381549	-1.23553
HORVU.MOREX.r2.3HG0260090	TCONS_00031332	tran	mRNA	X38_CK	X38_Cd	Dw	0.00112481	0.0381751	-0.367461
HORVU.MOREX.r2.7HG0556350	HORVU.MOREX.r2.7HG0556350.1	tran	mRNA	X38_CK	X38_Cd	Up	0.00112422	0.0381751	0.378914
HORVU.MOREX.r2.4HG0278120	TCONS_00044581	tran	mRNA	X38_CK	X38_Cd	Up	0.00112591	0.0381904	0.441688
HORVU.MOREX.r2.7HG0620100	TCONS_00081159	tran	mRNA	X38_CK	X38_Cd	Up	0.00113276	0.0384007	1.35447
HORVU.MOREX.r2.7HG0527410	TCONS_00081494	tran	mRNA	X38_CK	X38_Cd	Dw	0.00114277	0.0387175	-7.18706
HORVU.MOREX.r2.7HG0615970	HORVU.MOREX.r2.7HG0615970.1	tran	mRNA	X38_CK	X38_Cd	Up	0.00114596	0.0387583	1.52952
XLOC_037446	TCONS_00052943	tran	lncRNA	X38_CK	X38_Cd	Dw	0.00114571	0.0387583	-1.76831
XLOC_057998	TCONS_00081930	tran	lncRNA	X38_CK	X38_Cd	Up	0.0011451	0.0387583	0.407944
HORVU.MOREX.r2.2HG0115290	TCONS_00021067	tran	mRNA	X38_CK	X38_Cd	Up	0.0011513	0.038894	6.06218
HORVU.MOREX.r2.3HG0256990	TCONS_00037836	tran	mRNA	X38_CK	X38_Cd	Up	0.00115075	0.038894	0.622578
HORVU.MOREX.r2.2HG0103080	TCONS_00020197	tran	mRNA	X38_CK	X38_Cd	Up	0.0011543	0.0389487	0.682701
HORVU.MOREX.r2.6HG0498710	TCONS_00067198	tran	mRNA	X38_CK	X38_Cd	Up	0.00115462	0.0389487	0.83582
HORVU.MOREX.r2.7HG0621140	HORVU.MOREX.r2.7HG0621140.1	tran	mRNA	X38_CK	X38_Cd	Dw	0.00115491	0.0389487	-1.01486
HORVU.MOREX.r2.2HG0173000	HORVU.MOREX.r2.2HG0173000.1	tran	mRNA	X38_CK	X38_Cd	Dw	0.00115722	0.0390045	-2.14716
HORVU.MOREX.r2.1HG0054640	TCONS_00009487	tran	mRNA	X38_CK	X38_Cd	Up	0.00116301	0.0391769	0.514462
XLOC_055254	TCONS_00078128	tran	mRNA	X38_CK	X38_Cd	Up	0.00116657	0.0392743	0.66124
HORVU.MOREX.r2.3HG0193860	HORVU.MOREX.r2.3HG0193860.1	tran	mRNA	X38_CK	X38_Cd	Up	0.00117031	0.0393777	0.842292
XLOC_001334	TCONS_00001827	tran	lncRNA	X38_CK	X38_Cd	Dw	0.00117367	0.0394681	-1.04551
HORVU.MOREX.r2.4HG0319840	HORVU.MOREX.r2.4HG0319840.1	tran	mRNA	X38_CK	X38_Cd	Up	0.00117834	0.0396024	1.24314
HORVU.MOREX.r2.4HG0301490	TCONS_00046367	tran	mRNA	X38_CK	X38_Cd	Up	0.00118636	0.039849	1.69013
HORVU.MOREX.r2.2HG0110310	HORVU.MOREX.r2.2HG0110310.1	tran	mRNA	X38_CK	X38_Cd	Up	0.00119235	0.0400275	0.551689
HORVU.MOREX.r2.7HG0597690	HORVU.MOREX.r2.7HG0597690.1	tran	mRNA	X38_CK	X38_Cd	Dw	0.00119978	0.0402536	-1.36095
HORVU.MOREX.r2.7HG0528100	TCONS_00074736	tran	mRNA	X38_CK	X38_Cd	Dw	0.00120066	0.0402603	-4.30909
HORVU.MOREX.r2.6HG0502840	HORVU.MOREX.r2.6HG0502840.1	tran	mRNA	X38_CK	X38_Cd	Up	0.00120238	0.040295	1.03274
HORVU.MOREX.r2.1HG0066920	TCONS_00010314	tran	mRNA	X38_CK	X38_Cd	Up	0.00120755	0.0404452	0.82148
HORVU.MOREX.r2.4HG0279230	HORVU.MOREX.r2.4HG0279230.1	tran	mRNA	X38_CK	X38_Cd	Up	0.00121252	0.0405829	1.15429
HORVU.MOREX.r2.5HG0372800	HORVU.MOREX.r2.5HG0372800.1	tran	mRNA	X38_CK	X38_Cd	Up	0.00121305	0.0405829	0.786806
HORVU.MOREX.r2.7HG0535650	TCONS_00075256	tran	lncRNA	X38_CK	X38_Cd	Dw	0.00121734	0.0407033	-3.1828
HORVU.MOREX.r2.6HG0507940	TCONS_00073330	tran	mRNA	X38_CK	X38_Cd	Up	0.00121949	0.0407519	0.538988
HORVU.MOREX.r2.5HG0394280	HORVU.MOREX.r2.5HG0394280.1	tran	mRNA	X38_CK	X38_Cd	Up	0.00122127	0.0407649	2.0149
HORVU.MOREX.r2.5HG0426820	HORVU.MOREX.r2.5HG0426820.1	tran	mRNA	X38_CK	X38_Cd	Dw	0.00122086	0.0407649	-2.31663
HORVU.MOREX.r2.7HG0619610	HORVU.MOREX.r2.7HG0619610.1	tran	mRNA	X38_CK	X38_Cd	Up	0.0012224	0.0407795	6.36735
HORVU.MOREX.r2.6HG0479190	HORVU.MOREX.r2.6HG0479190.1	tran	mRNA	X38_CK	X38_Cd	Dw	0.00122337	0.0407885	-2.74735
HORVU.MOREX.r2.4HG0281790	HORVU.MOREX.r2.4HG0281790.1	tran	mRNA	X38_CK	X38_Cd	Dw	0.0012245	0.0407985	-10.33
HORVU.MOREX.r2.7HG0599500	TCONS_00079780	tran	mRNA	X38_CK	X38_Cd	Up	0.00122506	0.0407985	1.00113
XLOC_060649	TCONS_00085589	tran	lncRNA	X38_CK	X38_Cd	Dw	0.00122601	0.0408069	-2.09443
HORVU.MOREX.r2.7HG0618420	TCONS_00081048	tran	mRNA	X38_CK	X38_Cd	Up	0.00122825	0.0408584	0.664817
HORVU.MOREX.r2.2HG0124820	TCONS_00014389	tran	lncRNA	X38_CK	X38_Cd	Dw	0.00122968	0.0408828	-2.55072
HORVU.MOREX.r2.5HG0350840	TCONS_00049793	tran	mRNA	X38_CK	X38_Cd	Dw	0.00123092	0.0409006	-1.25223
HORVU.MOREX.r2.5HG0428670	TCONS_00062252	tran	mRNA	X38_CK	X38_Cd	Up	0.00123702	0.0410802	2.11466
HORVU.MOREX.r2.7HG0540550	HORVU.MOREX.r2.7HG0540550.1	tran	mRNA	X38_CK	X38_Cd	Up	0.00124012	0.0411493	1.29428
HORVU.MOREX.r2.7HG0598480	TCONS_00086480	tran	mRNA	X38_CK	X38_Cd	Up	0.00124051	0.0411493	1.05772
HORVU.MOREX.r2.1HG0007530	HORVU.MOREX.r2.1HG0007530.1	tran	mRNA	X38_CK	X38_Cd	Dw	0.00124397	0.0412409	-6.00388
HORVU.MOREX.r2.4HG0283660	TCONS_00044964	tran	mRNA	X38_CK	X38_Cd	Up	0.00124615	0.0412898	0.849064
HORVU.MOREX.r2.4HG0349160	TCONS_00044423	tran	mRNA	X38_CK	X38_Cd	Dw	0.00124733	0.0413055	-1.47179
XLOC_053669	TCONS_00075906	tran	lncRNA	X38_CK	X38_Cd	Dw	0.00124922	0.0413449	-0.905016
HORVU.MOREX.r2.4HG0283090	TCONS_00044920	tran	mRNA	X38_CK	X38_Cd	Up	0.00125182	0.0414076	2.11519
HORVU.MOREX.r2.6HG0468620	TCONS_00070613	tran	mRNA	X38_CK	X38_Cd	Up	0.0012595	0.0416381	1.51259
HORVU.MOREX.r2.5HG0371280	TCONS_00051312	tran	lncRNA	X38_CK	X38_Cd	Dw	0.00126068	0.0416536	-0.652601
HORVU.MOREX.r2.3HG0253370	HORVU.MOREX.r2.3HG0253370.1	tran	mRNA	X38_CK	X38_Cd	Up	0.00127146	0.0419388	0.806066
HORVU.MOREX.r2.6HG0476090	HORVU.MOREX.r2.6HG0476090.1	tran	mRNA	X38_CK	X38_Cd	Up	0.00127069	0.0419388	2.92366
HORVU.MOREX.r2.7HG0544120	HORVU.MOREX.r2.7HG0544120.1	tran	mRNA	X38_CK	X38_Cd	Up	0.00127093	0.0419388	1.48269
HORVU.MOREX.r2.1HG0038670	TCONS_00008393	tran	mRNA	X38_CK	X38_Cd	Up	0.00128499	0.0423612	0.648428
HORVU.MOREX.r2.3HG0272670	TCONS_00038848	tran	mRNA	X38_CK	X38_Cd	Up	0.0012918	0.042562	0.730757
HORVU.MOREX.r2.2HG0179310	HORVU.MOREX.r2.2HG0179310.1	tran	mRNA	X38_CK	X38_Cd	Up	0.00129421	0.0426059	0.570425
HORVU.MOREX.r2.4HG0317050	TCONS_00042121	tran	mRNA	X38_CK	X38_Cd	Up	0.00129532	0.0426059	5.98623
HORVU.MOREX.r2.7HG0608520	TCONS_00080427	tran	mRNA	X38_CK	X38_Cd	Up	0.0012949	0.0426059	5.69506
HORVU.MOREX.r2.3HG0204200	HORVU.MOREX.r2.3HG0204200.1	tran	mRNA	X38_CK	X38_Cd	Up	0.00129952	0.0426963	1.33076
XLOC_047067	TCONS_00066555	tran	lncRNA	X38_CK	X38_Cd	Dw	0.00129906	0.0426963	-0.697458
HORVU.MOREX.r2.7HG0533490	TCONS_00075108	tran	mRNA	X38_CK	X38_Cd	Up	0.00130053	0.0427055	0.991208
HORVU.MOREX.r2.3HG0225480	TCONS_00028868	tran	mRNA	X38_CK	X38_Cd	Up	0.00130615	0.0428184	0.785826
HORVU.MOREX.r2.6HG0463280	TCONS_00070204	tran	mRNA	X38_CK	X38_Cd	Up	0.00130535	0.0428184	0.906462
HORVU.MOREX.r2.7HG0609350	TCONS_00087268	tran	mRNA	X38_CK	X38_Cd	Up	0.00130552	0.0428184	0.70823
XLOC_000089	TCONS_00000134	tran	lncRNA	X38_CK	X38_Cd	Dw	0.00130939	0.0429004	-2.01881
HORVU.MOREX.r2.3HG0184070	TCONS_00032575	tran	mRNA	X38_CK	X38_Cd	Up	0.00131637	0.0430836	1.40011
HORVU.MOREX.r2.7HG0552530	HORVU.MOREX.r2.7HG0552530.1	tran	mRNA	X38_CK	X38_Cd	Up	0.00131645	0.0430836	0.673563
XLOC_046715	TCONS_00066075	tran	lncRNA	X38_CK	X38_Cd	Dw	0.00132349	0.0432898	-1.59408
HORVU.MOREX.r2.5HG0366520	HORVU.MOREX.r2.5HG0366520.1	tran	mRNA	X38_CK	X38_Cd	Up	0.00133334	0.0435715	0.601264
HORVU.MOREX.r2.5HG0400820	HORVU.MOREX.r2.5HG0400820.1	tran	mRNA	X38_CK	X38_Cd	Up	0.00133359	0.0435715	0.541955
HORVU.MOREX.r2.7HG0532240	HORVU.MOREX.r2.7HG0532240.1	tran	mRNA	X38_CK	X38_Cd	Dw	0.00133631	0.0436361	-1.4697
HORVU.MOREX.r2.6HG0448040	TCONS_00069142	tran	mRNA	X38_CK	X38_Cd	Up	0.00134013	0.043688	1.31086
HORVU.MOREX.r2.6HG0448040	TCONS_00069145	tran	mRNA	X38_CK	X38_Cd	Up	0.00134013	0.043688	1.31086
HORVU.MOREX.r2.6HG0448040	TCONS_00069147	tran	mRNA	X38_CK	X38_Cd	Up	0.00134013	0.043688	1.31086
HORVU.MOREX.r2.4HG0329900	HORVU.MOREX.r2.4HG0329900.1	tran	mRNA	X38_CK	X38_Cd	Up	0.00134117	0.0436975	0.447754
HORVU.MOREX.r2.5HG0398630	HORVU.MOREX.r2.5HG0398630.1	tran	mRNA	X38_CK	X38_Cd	Dw	0.00134196	0.043699	-0.71206
XLOC_044690	TCONS_00063218	tran	lncRNA	X38_CK	X38_Cd	Dw	0.00134698	0.0438382	-1.03014
HORVU.MOREX.r2.2HG0097910	TCONS_00019791	tran	mRNA	X38_CK	X38_Cd	Dw	0.00135183	0.0439474	-1.65544
HORVU.MOREX.r2.3HG0251860	TCONS_00037490	tran	mRNA	X38_CK	X38_Cd	Up	0.00135152	0.0439474	0.54465
HORVU.MOREX.r2.2HG0105400	HORVU.MOREX.r2.2HG0105400.1	tran	mRNA	X38_CK	X38_Cd	Up	0.00135588	0.0440545	1.32395
HORVU.MOREX.r2.7HG0620250	HORVU.MOREX.r2.7HG0620250.1	tran	lncRNA	X38_CK	X38_Cd	Dw	0.00135834	0.0441101	-1.01588
HORVU.MOREX.r2.3HG0250790	HORVU.MOREX.r2.3HG0250790.1	tran	mRNA	X38_CK	X38_Cd	Up	0.00136185	0.0441996	2.85298
HORVU.MOREX.r2.1HG0059960	HORVU.MOREX.r2.1HG0059960.1	tran	mRNA	X38_CK	X38_Cd	Up	0.00136448	0.0442358	2.05479
HORVU.MOREX.r2.7HG0532590	HORVU.MOREX.r2.7HG0532590.1	tran	mRNA	X38_CK	X38_Cd	Up	0.00136393	0.0442358	0.787968
XLOC_024208	TCONS_00034172	tran	lncRNA	X38_CK	X38_Cd	Dw	0.00136907	0.0443603	-1.13253
HORVU.MOREX.r2.2HG0083230	TCONS_00018719	tran	mRNA	X38_CK	X38_Cd	Up	0.00137202	0.0444312	0.791374
HORVU.MOREX.r2.3HG0195990	HORVU.MOREX.r2.3HG0195990.1	tran	mRNA	X38_CK	X38_Cd	Up	0.00138259	0.0447486	1.33868
HORVU.MOREX.r2.3HG0242420	HORVU.MOREX.r2.3HG0242420.1	tran	mRNA	X38_CK	X38_Cd	Up	0.0013836	0.0447567	0.696787
HORVU.MOREX.r2.7HG0602340	HORVU.MOREX.r2.7HG0602340.1	tran	mRNA	X38_CK	X38_Cd	Up	0.00138795	0.0448729	1.47425
HORVU.MOREX.r2.7HG0554710	HORVU.MOREX.r2.7HG0554710.1	tran	mRNA	X38_CK	X38_Cd	Dw	0.00139151	0.0449629	-0.673083
HORVU.MOREX.r2.4HG0335470	HORVU.MOREX.r2.4HG0335470.1	tran	mRNA	X38_CK	X38_Cd	Dw	0.00139761	0.0451352	-1.28393
HORVU.MOREX.r2.4HG0315330	TCONS_00041985	tran	mRNA	X38_CK	X38_Cd	Dw	0.00140216	0.0452571	-0.907863
HORVU.MOREX.r2.3HG0228420	HORVU.MOREX.r2.3HG0228420.1	tran	mRNA	X38_CK	X38_Cd	Up	0.00140608	0.0453588	0.761666
HORVU.MOREX.r2.2HG0150150	HORVU.MOREX.r2.2HG0150150.1	tran	mRNA	X38_CK	X38_Cd	Up	0.00140712	0.0453639	0.86924
HORVU.MOREX.r2.3HG0250750	HORVU.MOREX.r2.3HG0250750.1	tran	mRNA	X38_CK	X38_Cd	Up	0.00140778	0.0453639	0.610042
HORVU.MOREX.r2.6HG0465350	TCONS_00064774	tran	mRNA	X38_CK	X38_Cd	Up	0.00141171	0.0454655	1.82393
HORVU.MOREX.r2.3HG0241610	HORVU.MOREX.r2.3HG0241610.1	tran	mRNA	X38_CK	X38_Cd	Dw	0.00141545	0.0455608	-0.476154
HORVU.MOREX.r2.1HG0068090	HORVU.MOREX.r2.1HG0068090.1	tran	mRNA	X38_CK	X38_Cd	Up	0.00141819	0.0456242	1.82814
HORVU.MOREX.r2.2HG0134740	TCONS_00022524	tran	mRNA	X38_CK	X38_Cd	Up	0.00143788	0.0462321	1.71618
HORVU.MOREX.r2.2HG0145130	HORVU.MOREX.r2.2HG0145130.1	tran	mRNA	X38_CK	X38_Cd	Up	0.00143898	0.046242	2.97087
HORVU.MOREX.r2.7HG0621880	TCONS_00081294	tran	mRNA	X38_CK	X38_Cd	Dw	0.00144231	0.0463237	-0.772317
XLOC_013136	TCONS_00018463	tran	lncRNA	X38_CK	X38_Cd	Dw	0.00144437	0.0463645	-1.95218
HORVU.MOREX.r2.1HG0001970	HORVU.MOREX.r2.1HG0001970.1	tran	mRNA	X38_CK	X38_Cd	Dw	0.00145307	0.0466183	-1.61249
HORVU.MOREX.r2.4HG0279310	TCONS_00039410	tran	mRNA	X38_CK	X38_Cd	Dw	0.00145542	0.046668	-0.860046
HORVU.MOREX.r2.7HG0611950	HORVU.MOREX.r2.7HG0611950.1	tran	mRNA	X38_CK	X38_Cd	Up	0.00146062	0.0468093	2.41118
HORVU.MOREX.r2.4HG0294290	TCONS_00045717	tran	mRNA	X38_CK	X38_Cd	Up	0.0014631	0.0468633	0.665833
HORVU.MOREX.r2.1HG0046960	HORVU.MOREX.r2.1HG0046960.1	tran	mRNA	X38_CK	X38_Cd	Dw	0.00147123	0.0470721	-0.919803
XLOC_029970	TCONS_00042365	tran	lncRNA	X38_CK	X38_Cd	Up	0.00147095	0.0470721	1.53898
HORVU.MOREX.r2.6HG0499980	TCONS_00067283	tran	mRNA	X38_CK	X38_Cd	Up	0.00147447	0.0471501	0.893839
XLOC_035122	TCONS_00049716	tran	lncRNA	X38_CK	X38_Cd	Dw	0.00148389	0.0474253	-1.11573
HORVU.MOREX.r2.2HG0140300	HORVU.MOREX.r2.2HG0140300.1	tran	mRNA	X38_CK	X38_Cd	Dw	0.00148705	0.0475004	-0.631289
HORVU.MOREX.r2.4HG0348830	HORVU.MOREX.r2.4HG0348830.1	tran	mRNA	X38_CK	X38_Cd	Dw	0.00148822	0.047512	-0.816232
HORVU.MOREX.r2.3HG0226690	HORVU.MOREX.r2.3HG0226690.1	tran	mRNA	X38_CK	X38_Cd	Dw	0.00149201	0.047607	-1.12377
HORVU.MOREX.r2.2HG0149200	HORVU.MOREX.r2.2HG0149200.1	tran	mRNA	X38_CK	X38_Cd	Up	0.00149513	0.0476807	0.802812
HORVU.MOREX.r2.5HG0359930	TCONS_00057293	tran	mRNA	X38_CK	X38_Cd	Dw	0.00150076	0.0477681	-1.11852
HORVU.MOREX.r2.6HG0476810	TCONS_00065613	tran	mRNA	X38_CK	X38_Cd	Up	0.00149981	0.0477681	0.705294
XLOC_036221	TCONS_00051284	tran	lncRNA	X38_CK	X38_Cd	Dw	0.00150113	0.0477681	-2.1512
XLOC_036755	TCONS_00052037	tran	lncRNA	X38_CK	X38_Cd	Dw	0.00150077	0.0477681	-0.897816
HORVU.MOREX.r2.4HG0342240	HORVU.MOREX.r2.4HG0342240.1	tran	mRNA	X38_CK	X38_Cd	Up	0.00150576	0.0478894	1.36
HORVU.MOREX.r2.3HG0249280	TCONS_00037282	tran	mRNA	X38_CK	X38_Cd	Dw	0.00150735	0.047914	-0.866917
HORVU.MOREX.r2.5HG0423090	TCONS_00054803	tran	mRNA	X38_CK	X38_Cd	Dw	0.00150989	0.047969	-0.912185
HORVU.MOREX.r2.2HG0177360	TCONS_00018107	tran	mRNA	X38_CK	X38_Cd	Up	0.0015117	0.0480005	3.73853
HORVU.MOREX.r2.4HG0316000	TCONS_00047391	tran	mRNA	X38_CK	X38_Cd	Up	0.00151843	0.0481618	1.73232
HORVU.MOREX.r2.6HG0471220	HORVU.MOREX.r2.6HG0471220.1	tran	mRNA	X38_CK	X38_Cd	Up	0.00151778	0.0481618	0.569337
HORVU.MOREX.r2.4HG0283700	HORVU.MOREX.r2.4HG0283700.1	tran	mRNA	X38_CK	X38_Cd	Up	0.00151926	0.0481621	1.7589
HORVU.MOREX.r2.1HG0059130	HORVU.MOREX.r2.1HG0059130.1	tran	mRNA	X38_CK	X38_Cd	Dw	0.00152457	0.0482784	-0.855635
HORVU.MOREX.r2.5HG0386040	HORVU.MOREX.r2.5HG0386040.1	tran	mRNA	X38_CK	X38_Cd	Dw	0.00152415	0.0482784	-0.610061
HORVU.MOREX.r2.2HG0085930	TCONS_00011722	tran	mRNA	X38_CK	X38_Cd	Up	0.00152951	0.0483865	0.709584
HORVU.MOREX.r2.2HG0169830	TCONS_00024919	tran	mRNA	X38_CK	X38_Cd	Dw	0.00152964	0.0483865	-0.868955
HORVU.MOREX.r2.1HG0039130	TCONS_00008426	tran	lncRNA	X38_CK	X38_Cd	Up	0.00153172	0.0484264	0.453432
HORVU.MOREX.r2.2HG0180270	TCONS_00025621	tran	mRNA	X38_CK	X38_Cd	Dw	0.00153438	0.0484733	-0.63361
XLOC_033229	TCONS_00047062	tran	lncRNA	X38_CK	X38_Cd	Dw	0.00153486	0.0484733	-4.43806
HORVU.MOREX.r2.2HG0155240	TCONS_00016537	tran	mRNA	X38_CK	X38_Cd	Up	0.00153747	0.0484775	0.851776
HORVU.MOREX.r2.6HG0526510	TCONS_00074611	tran	mRNA	X38_CK	X38_Cd	Dw	0.00153674	0.0484775	-1.6638
XLOC_060184	TCONS_00084949	tran	lncRNA	X38_CK	X38_Cd	Up	0.00153743	0.0484775	3.68209
HORVU.MOREX.r2.1HG0044390	TCONS_00008788	tran	mRNA	X38_CK	X38_Cd	Up	0.00153891	0.0484967	1.24063
HORVU.MOREX.r2.4HG0281210	HORVU.MOREX.r2.4HG0281210.1	tran	mRNA	X38_CK	X38_Cd	Up	0.00154134	0.0485279	0.656155
HORVU.MOREX.r2.7HG0535630	HORVU.MOREX.r2.7HG0535630.1	tran	mRNA	X38_CK	X38_Cd	Dw	0.00154155	0.0485279	-3.82239
HORVU.MOREX.r2.1HG0077330	HORVU.MOREX.r2.1HG0077330.1	tran	mRNA	X38_CK	X38_Cd	Up	0.00154763	0.0486469	1.28431
HORVU.MOREX.r2.2HG0111970	TCONS_00013416	tran	mRNA	X38_CK	X38_Cd	Up	0.00154865	0.0486469	0.694313
HORVU.MOREX.r2.5HG0420450	TCONS_00061687	tran	mRNA	X38_CK	X38_Cd	Up	0.00154851	0.0486469	6.12937
HORVU.MOREX.r2.6HG0505370	HORVU.MOREX.r2.6HG0505370.1	tran	mRNA	X38_CK	X38_Cd	Dw	0.00154846	0.0486469	-1.74922
HORVU.MOREX.r2.2HG0102730	HORVU.MOREX.r2.2HG0102730.1	tran	mRNA	X38_CK	X38_Cd	Dw	0.00155182	0.0487202	-1.79318
HORVU.MOREX.r2.4HG0346550	TCONS_00044263	tran	mRNA	X38_CK	X38_Cd	Up	0.00155328	0.0487402	0.672348
HORVU.MOREX.r2.6HG0459260	TCONS_00064326	tran	mRNA	X38_CK	X38_Cd	Dw	0.00155415	0.0487414	-5.28071
HORVU.MOREX.r2.5HG0436300	HORVU.MOREX.r2.5HG0436300.1	tran	mRNA	X38_CK	X38_Cd	Up	0.00155536	0.0487533	2.16361
HORVU.MOREX.r2.5HG0429040	TCONS_00062286	tran	mRNA	X38_CK	X38_Cd	Dw	0.00155715	0.0487831	-1.07259
XLOC_060307	TCONS_00085114	tran	lncRNA	X38_CK	X38_Cd	Up	0.00156284	0.0489352	6.35308
HORVU.MOREX.r2.3HG0238260	HORVU.MOREX.r2.3HG0238260.1	tran	mRNA	X38_CK	X38_Cd	Up	0.00156674	0.0490312	1.58158
HORVU.MOREX.r2.2HG0162330	HORVU.MOREX.r2.2HG0162330.1	tran	mRNA	X38_CK	X38_Cd	Up	0.00157054	0.0490593	1.41944
HORVU.MOREX.r2.3HG0233260	HORVU.MOREX.r2.3HG0233260.1	tran	mRNA	X38_CK	X38_Cd	Up	0.00156934	0.0490593	1.2938
HORVU.MOREX.r2.5HG0435580	TCONS_00055687	tran	mRNA	X38_CK	X38_Cd	Dw	0.00156854	0.0490593	-1.03834
HORVU.MOREX.r2.7HG0529350	HORVU.MOREX.r2.7HG0529350.1	tran	mRNA	X38_CK	X38_Cd	Up	0.00157098	0.0490593	0.768536
XLOC_041681	TCONS_00059012	tran	lncRNA	X38_CK	X38_Cd	Dw	0.00157633	0.0492	-1.8791
HORVU.MOREX.r2.3HG0196610	HORVU.MOREX.r2.3HG0196610.1	tran	mRNA	X38_CK	X38_Cd	Up	0.00158102	0.0493184	0.304137
HORVU.MOREX.r2.7HG0592750	HORVU.MOREX.r2.7HG0592750.1	tran	mRNA	X38_CK	X38_Cd	Dw	0.0015818	0.0493184	-2.88227
HORVU.MOREX.r2.2HG0086260	HORVU.MOREX.r2.2HG0086260.1	tran	mRNA	X38_CK	X38_Cd	Dw	0.00158975	0.0494984	-1.02415
HORVU.MOREX.r2.7HG0578010	HORVU.MOREX.r2.7HG0578010.1	tran	mRNA	X38_CK	X38_Cd	Up	0.00158958	0.0494984	0.672447
HORVU.MOREX.r2.7HG0610070	TCONS_00087314	tran	mRNA	X38_CK	X38_Cd	Dw	0.00159011	0.0494984	-0.6809
HORVU.MOREX.r2.2HG0115270	HORVU.MOREX.r2.2HG0115270.1	tran	mRNA	X38_CK	X38_Cd	Up	0.00159586	0.0496498	0.546808
HORVU.MOREX.r2.7HG0538260	HORVU.MOREX.r2.7HG0538260.1	tran	mRNA	X38_CK	X38_Cd	Up	0.00159666	0.0496498	1.76822
HORVU.MOREX.r2.3HG0229170	TCONS_00029141	tran	mRNA	X38_CK	X38_Cd	Up	0.00160391	0.0498453	0.614616
HORVU.MOREX.r2.3HG0231960	HORVU.MOREX.r2.3HG0231960.1	tran	mRNA	X38_CK	X38_Cd	Up	0.00160465	0.0498453	1.27198
HORVU.MOREX.r2.5HG0364270	TCONS_00057665	tran	mRNA	X38_CK	X38_Cd	Up	0.00160712	0.0498956	0.654532
HORVU.MOREX.r2.2HG0168980	HORVU.MOREX.r2.2HG0168980.1	tran	mRNA	X38_CK	X38_Cd	Up	0.00160833	0.0499068	1.52004
HORVU.MOREX.r2.1HG0048540	HORVU.MOREX.r2.1HG0048540.1	tran	mRNA	X38_CK	X38_Cd	Up	0.00161663	0.05012	0.551981
HORVU.MOREX.r2.2HG0083020	HORVU.MOREX.r2.2HG0083020.1	tran	mRNA	X38_CK	X38_Cd	Up	0.00161862	0.05012	0.543456
HORVU.MOREX.r2.5HG0444750	TCONS_00056340	tran	mRNA	X38_CK	X38_Cd	Dw	0.0016173	0.05012	-1.14934
XLOC_017567	TCONS_00024808	tran	lncRNA	X38_CK	X38_Cd	Dw	0.00161855	0.05012	-1.39229
HORVU.MOREX.r2.2HG0145580	HORVU.MOREX.r2.2HG0145580.1	tran	mRNA	X38_CK	X38_Cd	Dw	0.00162103	0.0501681	-1.60277
HORVU.MOREX.r2.2HG0147820	TCONS_00016063	tran	mRNA	X38_CK	X38_Cd	Dw	0.00163102	0.0504505	-6.75664
HORVU.MOREX.r2.3HG0197060	HORVU.MOREX.r2.3HG0197060.1	tran	mRNA	X38_CK	X38_Cd	Up	0.00163377	0.0505092	0.71557
XLOC_057135	TCONS_00080724	tran	lncRNA	X38_CK	X38_Cd	Dw	0.00163568	0.0505415	-1.42719
HORVU.MOREX.r2.7HG0559930	TCONS_00076922	tran	mRNA	X38_CK	X38_Cd	Dw	0.00163677	0.0505484	-0.739477
HORVU.MOREX.r2.5HG0444030	HORVU.MOREX.r2.5HG0444030.1	tran	mRNA	X38_CK	X38_Cd	Up	0.00163849	0.050575	0.983807
HORVU.MOREX.r2.6HG0477610	TCONS_00071231	tran	lncRNA	X38_CK	X38_Cd	Dw	0.00164927	0.050881	-0.885991
XLOC_000818	TCONS_00001144	tran	lncRNA	X38_CK	X38_Cd	Up	0.0016523	0.0509475	2.87561
HORVU.MOREX.r2.3HG0262990	HORVU.MOREX.r2.3HG0262990.1	tran	mRNA	X38_CK	X38_Cd	Dw	0.00166201	0.0512201	-0.626934
HORVU.MOREX.r2.3HG0249370	HORVU.MOREX.r2.3HG0249370.1	tran	mRNA	X38_CK	X38_Cd	Up	0.00166384	0.0512345	0.865968
HORVU.MOREX.r2.4HG0290260	HORVU.MOREX.r2.4HG0290260.1	tran	mRNA	X38_CK	X38_Cd	Dw	0.00166422	0.0512345	-2.33861
HORVU.MOREX.r2.3HG0220570	HORVU.MOREX.r2.3HG0220570.1	tran	mRNA	X38_CK	X38_Cd	Up	0.0016689	0.0513516	0.482615
XLOC_046843	TCONS_00066256	tran	mRNA	X38_CK	X38_Cd	Dw	0.0016726	0.0514385	-0.781865
HORVU.MOREX.r2.2HG0137960	HORVU.MOREX.r2.2HG0137960.1	tran	mRNA	X38_CK	X38_Cd	Up	0.00167769	0.0515166	1.15071
HORVU.MOREX.r2.4HG0295800	TCONS_00045847	tran	mRNA	X38_CK	X38_Cd	Dw	0.00167818	0.0515166	-1.27615
HORVU.MOREX.r2.5HG0418330	TCONS_00054452	tran	mRNA	X38_CK	X38_Cd	Dw	0.00167703	0.0515166	-2.70216
HORVU.MOREX.r2.7HG0619320	HORVU.MOREX.r2.7HG0619320.1	tran	mRNA	X38_CK	X38_Cd	Up	0.00167866	0.0515166	1.37647
HORVU.MOREX.r2.2HG0101280	HORVU.MOREX.r2.2HG0101280.1	tran	mRNA	X38_CK	X38_Cd	Dw	0.00167954	0.0515166	-3.89503
HORVU.MOREX.r2.1HG0039790	HORVU.MOREX.r2.1HG0039790.1	tran	mRNA	X38_CK	X38_Cd	Up	0.00168992	0.0518079	0.698784
HORVU.MOREX.r2.1HG0058220	HORVU.MOREX.r2.1HG0058220.1	tran	mRNA	X38_CK	X38_Cd	Up	0.00169563	0.0519559	1.3733
HORVU.MOREX.r2.1HG0020620	TCONS_00007081	tran	mRNA	X38_CK	X38_Cd	Up	0.00171721	0.0525673	0.374239
HORVU.MOREX.r2.2HG0150150	TCONS_00023652	tran	mRNA	X38_CK	X38_Cd	Up	0.00171917	0.0525673	1.24761
HORVU.MOREX.r2.5HG0369760	TCONS_00051206	tran	mRNA	X38_CK	X38_Cd	Up	0.00171883	0.0525673	0.57117
HORVU.MOREX.r2.7HG0589870	HORVU.MOREX.r2.7HG0589870.1	tran	mRNA	X38_CK	X38_Cd	Up	0.00171817	0.0525673	0.774974
HORVU.MOREX.r2.1HG0078620	HORVU.MOREX.r2.1HG0078620.1	tran	mRNA	X38_CK	X38_Cd	Up	0.00172371	0.0526788	0.96329
HORVU.MOREX.r2.3HG0253930	HORVU.MOREX.r2.3HG0253930.1	tran	mRNA	X38_CK	X38_Cd	Dw	0.00172557	0.0526806	-1.25692
XLOC_030781	TCONS_00043518	tran	lncRNA	X38_CK	X38_Cd	Dw	0.00172509	0.0526806	-0.831069
HORVU.MOREX.r2.2HG0138720	TCONS_00022808	tran	mRNA	X38_CK	X38_Cd	Dw	0.00172841	0.0526949	-1.47546
HORVU.MOREX.r2.5HG0415500	TCONS_00054254	tran	mRNA	X38_CK	X38_Cd	Up	0.00172873	0.0526949	0.903647
XLOC_017881	TCONS_00025236	tran	lncRNA	X38_CK	X38_Cd	Dw	0.00172812	0.0526949	-2.63417
HORVU.MOREX.r2.3HG0212150	TCONS_00034550	tran	mRNA	X38_CK	X38_Cd	Up	0.00173112	0.0527402	0.588426
HORVU.MOREX.r2.2HG0083750	TCONS_00011562	tran	mRNA	X38_CK	X38_Cd	Up	0.00174132	0.0530235	0.822949
HORVU.MOREX.r2.2HG0111130	TCONS_00020742	tran	mRNA	X38_CK	X38_Cd	Up	0.00174718	0.0531743	0.961541
HORVU.MOREX.r2.3HG0193940	HORVU.MOREX.r2.3HG0193940.1	tran	mRNA	X38_CK	X38_Cd	Up	0.00174938	0.0532137	1.97311
HORVU.MOREX.r2.5HG0359550	HORVU.MOREX.r2.5HG0359550.1	tran	mRNA	X38_CK	X38_Cd	Dw	0.00175352	0.053312	-2.02918
HORVU.MOREX.r2.6HG0475410	TCONS_00065506	tran	lncRNA	X38_CK	X38_Cd	Dw	0.00175506	0.0533312	-1.18982
HORVU.MOREX.r2.1HG0073100	HORVU.MOREX.r2.1HG0073100.1	tran	mRNA	X38_CK	X38_Cd	Up	0.00175744	0.0533758	1.03772
HORVU.MOREX.r2.7HG0610260	HORVU.MOREX.r2.7HG0610260.1	tran	mRNA	X38_CK	X38_Cd	Up	0.00176007	0.0534279	1.21499
HORVU.MOREX.r2.6HG0501280	HORVU.MOREX.r2.6HG0501280.1	tran	mRNA	X38_CK	X38_Cd	Up	0.00176155	0.0534453	3.10274
HORVU.MOREX.r2.6HG0520590	TCONS_00074164	tran	mRNA	X38_CK	X38_Cd	Up	0.00176666	0.0535727	0.480216
HORVU.MOREX.r2.5HG0360700	TCONS_00057354	tran	mRNA	X38_CK	X38_Cd	Dw	0.00176878	0.053609	-1.0647
HORVU.MOREX.r2.1HG0035290	TCONS_00002536	tran	mRNA	X38_CK	X38_Cd	Up	0.00177077	0.0536417	3.35135
HORVU.MOREX.r2.2HG0105020	HORVU.MOREX.r2.2HG0105020.1	tran	mRNA	X38_CK	X38_Cd	Up	0.00177215	0.0536558	2.44653
HORVU.MOREX.r2.6HG0520490	HORVU.MOREX.r2.6HG0520490.1	tran	mRNA	X38_CK	X38_Cd	Dw	0.00177737	0.0537742	-0.741676
HORVU.MOREX.r2.7HG0619340	HORVU.MOREX.r2.7HG0619340.1	tran	mRNA	X38_CK	X38_Cd	Up	0.0017779	0.0537742	1.34477
HORVU.MOREX.r2.7HG0586360	TCONS_00078855	tran	mRNA	X38_CK	X38_Cd	Up	0.00178872	0.0540739	6.18761
HORVU.MOREX.r2.6HG0455690	TCONS_00069665	tran	mRNA	X38_CK	X38_Cd	Dw	0.00179457	0.0542225	-0.903321
HORVU.MOREX.r2.1HG0020800	TCONS_00001454	tran	mRNA	X38_CK	X38_Cd	Up	0.00179733	0.0542501	0.783748
HORVU.MOREX.r2.6HG0455150	TCONS_00064042	tran	mRNA	X38_CK	X38_Cd	Dw	0.00179668	0.0542501	-0.746627
HORVU.MOREX.r2.7HG0611550	HORVU.MOREX.r2.7HG0611550.1	tran	mRNA	X38_CK	X38_Cd	Up	0.00180229	0.0543718	3.142
HORVU.MOREX.r2.5HG0443850	TCONS_00056270	tran	mRNA	X38_CK	X38_Cd	Dw	0.00180428	0.0544039	-1.17906
HORVU.MOREX.r2.4HG0304750	HORVU.MOREX.r2.4HG0304750.1	tran	mRNA	X38_CK	X38_Cd	Up	0.0018077	0.0544792	3.7668
HORVU.MOREX.r2.7HG0563180	TCONS_00077177	tran	mRNA	X38_CK	X38_Cd	Up	0.00180864	0.0544794	0.630298
HORVU.MOREX.r2.1HG0027460	HORVU.MOREX.r2.1HG0027460.1	tran	mRNA	X38_CK	X38_Cd	Up	0.00181543	0.0545438	0.513935
HORVU.MOREX.r2.3HG0186570	HORVU.MOREX.r2.3HG0186570.1	tran	mRNA	X38_CK	X38_Cd	Up	0.00181481	0.0545438	2.04571
HORVU.MOREX.r2.3HG0255920	HORVU.MOREX.r2.3HG0255920.1	tran	mRNA	X38_CK	X38_Cd	Up	0.00181211	0.0545438	1.18975
HORVU.MOREX.r2.4HG0318960	HORVU.MOREX.r2.4HG0318960.1	tran	mRNA	X38_CK	X38_Cd	Up	0.00181311	0.0545438	0.890883
HORVU.MOREX.r2.5HG0439250	TCONS_00062927	tran	mRNA	X38_CK	X38_Cd	Dw	0.0018142	0.0545438	-2.27322
HORVU.MOREX.r2.6HG0498830	TCONS_00067209	tran	mRNA	X38_CK	X38_Cd	Up	0.00181675	0.0545554	1.08329
HORVU.MOREX.r2.1HG0048930	HORVU.MOREX.r2.1HG0048930.1	tran	mRNA	X38_CK	X38_Cd	Dw	0.00182558	0.0547927	-1.93562
HORVU.MOREX.r2.2HG0089330	HORVU.MOREX.r2.2HG0089330.1	tran	mRNA	X38_CK	X38_Cd	Up	0.00182865	0.0548567	0.435453
HORVU.MOREX.r2.5HG0413660	TCONS_00054136	tran	mRNA	X38_CK	X38_Cd	Up	0.00183479	0.0550129	0.963097
HORVU.MOREX.r2.1HG0013420	HORVU.MOREX.r2.1HG0013420.1	tran	mRNA	X38_CK	X38_Cd	Dw	0.00184448	0.0552514	-1.43672
HORVU.MOREX.r2.1HG0053440	TCONS_00003814	tran	mRNA	X38_CK	X38_Cd	Up	0.00184463	0.0552514	0.576533
HORVU.MOREX.r2.1HG0041860	HORVU.MOREX.r2.1HG0041860.1	tran	mRNA	X38_CK	X38_Cd	Up	0.00185529	0.0554492	1.24138
HORVU.MOREX.r2.2HG0115290	TCONS_00021065	tran	mRNA	X38_CK	X38_Cd	Up	0.00185248	0.0554492	5.25469
HORVU.MOREX.r2.2HG0130750	HORVU.MOREX.r2.2HG0130750.1	tran	mRNA	X38_CK	X38_Cd	Up	0.00185362	0.0554492	0.630209
HORVU.MOREX.r2.3HG0264690	TCONS_00038335	tran	mRNA	X38_CK	X38_Cd	Dw	0.00185466	0.0554492	-4.47315
HORVU.MOREX.r2.4HG0318710	TCONS_00047586	tran	mRNA	X38_CK	X38_Cd	Dw	0.00185597	0.0554492	-1.44993
HORVU.MOREX.r2.5HG0428780	HORVU.MOREX.r2.5HG0428780.1	tran	mRNA	X38_CK	X38_Cd	Dw	0.00185719	0.0554575	-3.1324
HORVU.MOREX.r2.7HG0534770	TCONS_00082055	tran	mRNA	X38_CK	X38_Cd	Up	0.00185973	0.0555052	0.547255
HORVU.MOREX.r2.1HG0000980	HORVU.MOREX.r2.1HG0000980.1	tran	mRNA	X38_CK	X38_Cd	Up	0.0018641	0.0556073	1.83379
HORVU.MOREX.r2.5HG0372840	HORVU.MOREX.r2.5HG0372840.1	tran	mRNA	X38_CK	X38_Cd	Up	0.0018669	0.0556626	0.443758
HORVU.MOREX.r2.5HG0382820	HORVU.MOREX.r2.5HG0382820.1	tran	mRNA	X38_CK	X38_Cd	Up	0.00186787	0.055663	0.768818
HORVU.MOREX.r2.2HG0152360	HORVU.MOREX.r2.2HG0152360.1	tran	mRNA	X38_CK	X38_Cd	Up	0.00187284	0.0557755	2.17658
XLOC_061534	TCONS_00086855	tran	lncRNA	X38_CK	X38_Cd	Dw	0.00187355	0.0557755	-1.63021
HORVU.MOREX.r2.4HG0285000	TCONS_00039824	tran	mRNA	X38_CK	X38_Cd	Up	0.00189003	0.0562377	2.15338
HORVU.MOREX.r2.5HG0376380	TCONS_00058568	tran	mRNA	X38_CK	X38_Cd	Up	0.00190156	0.0565521	0.549648
HORVU.MOREX.r2.5HG0380050	TCONS_00058831	tran	mRNA	X38_CK	X38_Cd	Up	0.00190394	0.0565941	0.450993
HORVU.MOREX.r2.4HG0333900	TCONS_00048616	tran	mRNA	X38_CK	X38_Cd	Up	0.00191222	0.0568116	0.604387
HORVU.MOREX.r2.7HG0585760	HORVU.MOREX.r2.7HG0585760.1	tran	mRNA	X38_CK	X38_Cd	Up	0.00192044	0.056998	0.549449
HORVU.MOREX.r2.7HG0622370	TCONS_00081333	tran	mRNA	X38_CK	X38_Cd	Dw	0.00192028	0.056998	-1.08206
HORVU.MOREX.r2.4HG0284560	TCONS_00045021	tran	mRNA	X38_CK	X38_Cd	Up	0.00192231	0.0570247	1.60325
HORVU.MOREX.r2.5HG0386870	HORVU.MOREX.r2.5HG0386870.1	tran	mRNA	X38_CK	X38_Cd	Up	0.00192427	0.057054	0.68409
HORVU.MOREX.r2.2HG0079930	TCONS_00018473	tran	mRNA	X38_CK	X38_Cd	Up	0.00192537	0.0570576	0.351579
HORVU.MOREX.r2.3HG0212270	HORVU.MOREX.r2.3HG0212270.1	tran	mRNA	X38_CK	X38_Cd	Up	0.00193173	0.0572172	0.565153
HORVU.MOREX.r2.7HG0527330	TCONS_00081488	tran	mRNA	X38_CK	X38_Cd	Dw	0.00193309	0.0572287	-0.574424
HORVU.MOREX.r2.6HG0464740	TCONS_00064717	tran	mRNA	X38_CK	X38_Cd	Up	0.00193744	0.0573283	0.79917
HORVU.MOREX.r2.5HG0418980	TCONS_00061598	tran	mRNA	X38_CK	X38_Cd	Up	0.0019397	0.0573664	0.88991
HORVU.MOREX.r2.3HG0245500	HORVU.MOREX.r2.3HG0245500.1	tran	mRNA	X38_CK	X38_Cd	Dw	0.00194491	0.0574916	-1.03839
HORVU.MOREX.r2.5HG0398010	HORVU.MOREX.r2.5HG0398010.1	tran	mRNA	X38_CK	X38_Cd	Up	0.00194988	0.0576093	1.19834
HORVU.MOREX.r2.7HG0563650	HORVU.MOREX.r2.7HG0563650.1	tran	mRNA	X38_CK	X38_Cd	Up	0.00196013	0.057883	0.804254
HORVU.MOREX.r2.2HG0092380	TCONS_00012163	tran	mRNA	X38_CK	X38_Cd	Dw	0.00196112	0.0578831	-5.42624
HORVU.MOREX.r2.2HG0165330	TCONS_00017274	tran	mRNA	X38_CK	X38_Cd	Up	0.00196697	0.0580266	0.363091
XLOC_016199	TCONS_00022923	tran	lncRNA	X38_CK	X38_Cd	Up	0.0019691	0.0580603	6.58416
HORVU.MOREX.r2.4HG0337860	HORVU.MOREX.r2.4HG0337860.1	tran	mRNA	X38_CK	X38_Cd	Up	0.00197124	0.058094	1.62091
HORVU.MOREX.r2.7HG0549470	TCONS_00076180	tran	mRNA	X38_CK	X38_Cd	Up	0.00197364	0.0581355	0.652395
HORVU.MOREX.r2.6HG0458280	TCONS_00069849	tran	mRNA	X38_CK	X38_Cd	Up	0.00197705	0.0582068	0.953135
HORVU.MOREX.r2.7HG0544860	HORVU.MOREX.r2.7HG0544860.1	tran	mRNA	X38_CK	X38_Cd	Dw	0.0019789	0.0582322	-1.1489
HORVU.MOREX.r2.7HG0624040	TCONS_00088302	tran	mRNA	X38_CK	X38_Cd	Dw	0.00198628	0.05842	-0.972754
HORVU.MOREX.r2.3HG0247500	TCONS_00030412	tran	mRNA	X38_CK	X38_Cd	Up	0.00198794	0.0584396	0.462215
HORVU.MOREX.r2.7HG0532380	TCONS_00075031	tran	mRNA	X38_CK	X38_Cd	Dw	0.0019916	0.0585179	-2.38651
HORVU.MOREX.r2.7HG0613070	HORVU.MOREX.r2.7HG0613070.1	tran	lncRNA	X38_CK	X38_Cd	Dw	0.0020082	0.0589759	-0.662263
HORVU.MOREX.r2.2HG0126360	HORVU.MOREX.r2.2HG0126360.1	tran	mRNA	X38_CK	X38_Cd	Up	0.00201262	0.0590632	0.684962
[truncated: 56,649 more rows]
